# Supplementary material for: Cu-catalyzed mild and efficient oxidation of THβCs using air: application in practical total syntheses of perlolyrine and flazin
Source: PubMed Central journal article supplement (PMC9078326; doi:10.1039/c7ra13434g), 2018-02-12
Supplement: RA-008-C7RA13434G-s001.pdf [file RA-008-C7RA13434G-s001.pdf]

# Supporting Information

## **Cu-Catalyzed Mild and Efficient Oxidation of TH $\beta$ Cs Using Air: Application in Practical Total Syntheses of Perlolyrine and Flazin**

Bo Zheng, Tien Ha Trieu, Tian-Zhuo Meng, Xia Lu, Jing Dong, Qiang Zhang, and Xiao-Xin Shi\*

Shanghai Key Laboratory of Chemical Biology, School of Pharmacy, East China University of Science and  
Technology, 130 Mei-Long Road, Shanghai 200237, P. R. China.

E-mail: xxshi@ecust.edu.cn

### **Table of Contents**

1. Characterization Data of  $\beta$ -Carbolines **2a-2x** (S2)
2.  $^1\text{H}$  and  $^{13}\text{C}$  NMR Spectra of All Compounds (S11)

## 1. Characterization Data of $\beta$ -Carbolines 2a-2x:

### 1-Phenyl-9H-pyrido[3,4-b]indole 2a:

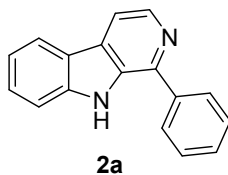

Pale yellow solid, mp 240-241 °C.  $^1\text{H}$  NMR (DMSO- $d_6$ , 400 MHz)  $\delta$  11.54 (s, 1H, NH in indole), 8.48 (d,  $J = 5.2$  Hz, 1H), 8.27 (d,  $J = 7.9$  Hz, 1H), 8.13 (d,  $J = 5.2$  Hz, 1H), 8.05 (d,  $J = 7.8$  Hz, 2H), 7.47-7.72 (m, 5H), 7.28 (t,  $J = 7.6$  Hz, 1H).  $^{13}\text{C}$  NMR (DMSO- $d_6$ , 100 MHz)  $\delta$  142.51, 141.44, 138.75, 138.69, 133.34, 129.49, 129.03 (2C), 128.80, 128.71 (2C), 128.46, 121.88, 121.16, 119.80, 114.17, 112.75. HRMS (ESI)  $m/z$  calcd for  $\text{C}_{17}\text{H}_{13}\text{N}_2$   $[\text{M}+\text{H}]^+$ : 245.1079, found: 245.1075. IR (KBr film) 3061, 2954, 2877, 1623, 1560, 1496, 1415, 1322, 1234, 737, 698  $\text{cm}^{-1}$ .

### 1-(4-Nitrophenyl)-9H-pyrido[3,4-b]indole 2b:

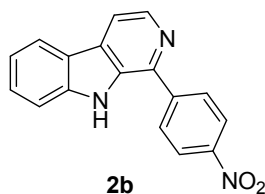

Pale yellow solid, mp. 242-243 °C.  $^1\text{H}$  NMR (DMSO- $d_6$ , 400 MHz)  $\delta$  11.74 (s, 1H, NH in indole), 8.53 (d,  $J = 5.1$  Hz, 1H), 8.44 (d,  $J = 8.5$  Hz, 2H), 8.28-8.35 (m, 3H), 8.23 (d,  $J = 5.1$  Hz, 1H), 7.66 (d,  $J = 8.0$  Hz, 1H), 7.59 (dd,  $J_1 = 8.0$  Hz,  $J_2 = 7.9$  Hz, 1H), 7.30 (dd,  $J_1 = 7.8$  Hz,  $J_2 = 7.9$  Hz, 1H).  $^{13}\text{C}$  NMR (DMSO- $d_6$ , 100 MHz)  $\delta$  147.02, 144.54, 141.20, 139.37, 138.63, 133.35, 129.86, 129.50 (2C), 128.53, 123.74 (2C), 121.70, 120.65, 119.77, 115.09, 112.35. HRMS (ESI)  $m/z$  calcd for  $\text{C}_{17}\text{H}_{12}\text{N}_3\text{O}_2$   $[\text{M}+\text{H}]^+$ : 290.0930, found: 290.0942. IR (KBr film) 3368, 3060, 2922, 2847, 1624, 1599, 1510, 1455, 1425, 1348, 1226, 1103, 855, 831, 757, 740, 531  $\text{cm}^{-1}$ .

### 1-(2-Nitrophenyl)-9H-pyrido[3,4-b]indole 2c:

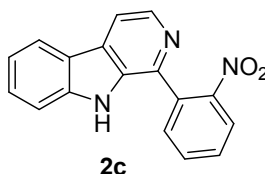

Pale yellow solid, mp. 241-242 °C.  $^1\text{H}$  NMR ( $\text{CDCl}_3$ , 400 MHz)  $\delta$  8.47 (s, 1H, NH in indole), 8.45 (d,  $J = 5.2$  Hz, 1H), 8.13 (d,  $J = 8.0$  Hz, 1H), 8.02 (d,  $J = 8.1$  Hz, 1H), 7.95 (d,  $J = 5.2$  Hz, 1H), 7.72 (d,  $J = 8.0$  Hz, 1H), 7.68 (dd,  $J_1 = 8.1$  Hz,  $J_2 = 8.0$  Hz, 1H), 7.57 (dd,  $J_1 = 8.1$  Hz,  $J_2 = 8.0$  Hz, 1H), 7.52 (dd,  $J_1 = 8.1$  Hz,  $J_2 = 8.0$  Hz, 1H), 7.38 (d,  $J = 8.1$  Hz, 1H), 7.30 (dd,  $J_1 = 8.1$  Hz,  $J_2 = 8.0$  Hz, 1H).  $^{13}\text{C}$  NMR (DMSO-

$d_6$ , 100 MHz)  $\delta$  149.16, 141.04, 139.34, 138.08, 133.51, 133.17, 132.59, 131.58, 129.76, 128.97, 128.43, 124.70, 121.81, 120.79, 119.65, 114.59, 112.21. HRMS (ESI)  $m/z$  calcd for  $C_{17}H_{12}N_3O_2$   $[M+H]^+$ : 290.0930, found: 290.0938. IR (KBr film) 3359, 3068, 2923, 2855, 1626, 1566, 1524, 1420, 1320, 1235, 738  $cm^{-1}$ .

### 1-(4-Methoxyphenyl)-9H-pyrido[3,4-b]indole 2d:

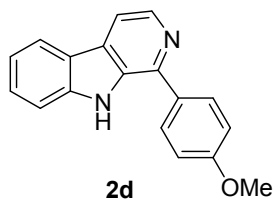

White solid, mp 158-159°C.  $^1H$  NMR (DMSO- $d_6$ , 400 MHz)  $\delta$  11.48 (s, 1H, NH in indole), 8.43 (d,  $J = 5.2$  Hz, 1H), 8.23 (d,  $J = 7.9$  Hz, 1H), 8.05 (d,  $J = 5.2$  Hz, 1H), 8.02 (d,  $J = 8.2$  Hz, 2H), 7.67 (d,  $J = 8.1$  Hz, 1H), 7.55 (dd,  $J_1 = 8.1$  Hz,  $J_2 = 8.0$  Hz, 1H), 7.25 (dd,  $J_1 = 7.9$  Hz,  $J_2 = 8.0$  Hz, 1H), 7.17 (d,  $J = 8.2$  Hz, 2H), 3.87 (s, 3H).  $^{13}C$  NMR (DMSO- $d_6$ , 100 MHz)  $\delta$  160.06, 142.60, 141.53, 138.72, 133.24, 131.39, 130.14 (2C), 129.46, 128.46, 121.97, 121.37, 119.88, 114.57 (2C), 113.74, 112.88, 55.73. HRMS (ESI)  $m/z$  calcd for  $C_{18}H_{15}N_2O$   $[M+H]^+$ : 275.1184, found: 275.1180. IR (KBr film) 3141, 3064, 2980, 1626, 1610, 1514, 1470, 1430, 1322, 1254, 1238, 1175, 1038, 742  $cm^{-1}$ .

### 1-(3-(Trifluoromethyl)-phenyl)-9H-pyrido[3,4-b]indole 2e:

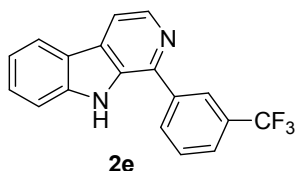

White solid, mp. 140-141°C.  $^1H$  NMR ( $CDCl_3$ , 400 MHz)  $\delta$  8.76 (s, 1H, NH in indole), 8.58 (d,  $J = 5.2$  Hz, 1H), 8.21 (s, 1H), 8.17 (d,  $J = 7.9$  Hz, 1H), 8.10 (d,  $J = 7.7$  Hz, 1H), 7.98 (d,  $J = 5.2$  Hz, 1H), 7.70 (d,  $J = 7.8$  Hz, 1H), 7.64 (dd,  $J_1 = 7.9$  Hz,  $J_2 = 7.8$  Hz, 1H), 7.57 (dd,  $J_1 = 7.8$  Hz,  $J_2 = 7.7$  Hz, 1H), 7.51 (d,  $J = 8.0$  Hz, 1H), 7.33 (dd,  $J_1 = 7.8$  Hz,  $J_2 = 8.0$  Hz, 1H).  $^{13}C$  NMR ( $CDCl_3$ , 100 MHz)  $\delta$  141.18, 140.82, 139.18, 139.10, 133.64, 131.33, 131.28 (q,  $^2J_{CF} = 32.5$  Hz), 130.45, 129.37, 128.76, 125.30 (q,  $^3J_{CF} = 4.1$  Hz), 124.98 (q,  $^3J_{CF} = 4.1$  Hz), 123.95 (q,  $^1J_{CF} = 272.6$  Hz), 121.79, 121.68, 120.40, 114.49, 111.77. HRMS (ESI)  $m/z$  calcd for  $C_{18}H_{12}F_3N_2$   $[M+H]^+$ : 313.0953, found: 313.0950. IR (KBr film) 3127, 3062, 2955, 2876, 1626, 1566, 1499, 1456, 1338, 1276, 1234, 1167, 1125, 1071, 807, 744, 699  $cm^{-1}$ .

### 1-(3,4-Dimethoxyphenyl)-9H-pyrido[3,4-b]indole 2f:

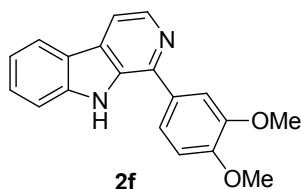

White solid, mp 106-107°C. <sup>1</sup>H NMR (CDCl<sub>3</sub>, 400 MHz) δ 9.07 (s, 1H, NH in indole), 8.53 (d, *J* = 5.2 Hz, 1H), 8.15 (d, *J* = 8.0 Hz, 1H), 7.91 (d, *J* = 5.2 Hz, 1H), 7.43-7.57 (m, 5H), 7.30 (dd, *J*<sub>1</sub> = 7.9 Hz, *J*<sub>2</sub> = 8.0 Hz, 1H), 6.89 (d, *J* = 8.0 Hz, 1H), 3.88 (s, 3H), 3.85 (s, 3H). <sup>13</sup>C NMR (DMSO-*d*<sub>6</sub>, 100 MHz) δ 149.76, 149.38, 142.77, 141.51, 138.65, 133.31, 131.58, 129.44, 128.48, 122.00, 121.37, 121.24, 119.89, 113.81, 112.90, 112.29, 112.23, 56.14, 55.89. HRMS (ESI) *m/z* calcd for C<sub>19</sub>H<sub>17</sub>N<sub>2</sub>O<sub>2</sub> [M+H]<sup>+</sup>: 305.1290, found: 305.1282. IR (KBr film) 3363, 2935, 1626, 1516, 1457, 1409, 1319, 1260, 1144, 1025, 747 cm<sup>-1</sup>.

### 1-(Naphthalen-1-yl)-9H-pyrido[3,4-*b*]indole **2g**:

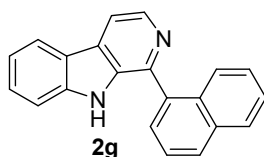

White solid, mp. 114-115 °C. <sup>1</sup>H NMR (DMSO-*d*<sub>6</sub>, 400 MHz) δ 11.16 (s, 1H, NH in indole), 8.52 (d, *J* = 5.2 Hz, 1H), 8.30 (d, *J* = 7.9 Hz, 1H), 8.21 (d, *J* = 5.2 Hz, 1H), 8.12 (d, *J* = 7.8 Hz, 1H), 8.07 (d, *J* = 8.0 Hz, 1H), 7.68-7.77 (m, 3H), 7.48-7.58 (m, 3H), 7.44 (dd, *J*<sub>1</sub> = 7.8 Hz, *J*<sub>2</sub> = 7.9 Hz, 1H), 7.26 (dd, *J*<sub>1</sub> = 7.9 Hz, *J*<sub>2</sub> = 8.0 Hz, 1H). <sup>13</sup>C NMR (DMSO-*d*<sub>6</sub>, 100 MHz) δ 143.22, 141.40, 138.47, 136.09, 135.15, 134.11, 131.69, 129.15, 128.98, 128.77, 128.60, 127.98, 126.82, 126.52, 126.13, 126.04, 122.19, 121.34, 119.86, 114.48, 112.72. HRMS (ESI) *m/z* calcd for C<sub>21</sub>H<sub>15</sub>N<sub>2</sub> [M+H]<sup>+</sup>: 295.1235, found: 295.1242. IR (KBr film) 3409, 3130, 3054, 2924, 2853, 1624, 1563, 1454, 1419, 1319, 1235, 777, 744 cm<sup>-1</sup>.

### 1-(Thiophen-2-yl)-9H-pyrido[3,4-*b*]indole **2h**:

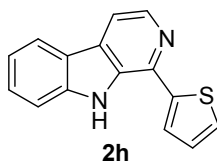

Pale yellow solid, mp. 165-166 °C. <sup>1</sup>H NMR (CDCl<sub>3</sub>, 400 MHz) δ 8.90 (s, 1H, NH in indole), 8.48 (d, *J* = 5.2 Hz, 1H), 8.11 (d, *J* = 7.9 Hz, 1H), 7.86 (d, *J* = 5.2 Hz, 1H), 7.74 (d, *J* = 3.6 Hz, 1H), 7.50-7.58 (m, 2H), 7.46 (d, *J* = 5.0 Hz, 1H), 7.30 (dd, *J*<sub>1</sub> = 7.8 Hz, *J*<sub>2</sub> = 7.9 Hz, 1H), 7.18 (dd, *J*<sub>1</sub> = 5.0 Hz, *J*<sub>2</sub> = 3.6 Hz, 1H). <sup>13</sup>C NMR (CDCl<sub>3</sub>, 100 MHz) δ 142.83, 140.64, 139.18, 137.10, 132.27, 130.40, 128.64, 128.04, 127.20, 125.17, 121.80, 121.71, 120.49, 113.81, 111.83. HRMS (ESI) *m/z* calcd for C<sub>15</sub>H<sub>11</sub>N<sub>2</sub>S [M+H]<sup>+</sup>: 251.0643, found: 251.0642. IR (KBr film) 3204, 3057, 2924, 2853, 1623, 1562, 1495, 1453, 1421, 1319, 1232, 743, 702 cm<sup>-1</sup>.

### 1-(Pyridin-2-yl)-9H-pyrido[3,4-b]indole 2i:

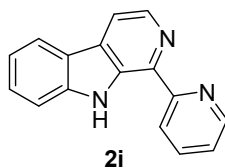

Pale yellow solid, mp 179-180 °C. <sup>1</sup>H NMR (CDCl<sub>3</sub>, 400 MHz) δ 11.33 (s, 1H, NH in indole), 8.78 (d, *J* = 5.0 Hz, 1H), 8.75 (d, *J* = 8.0 Hz, 1H), 8.55 (d, *J* = 5.1 Hz, 1H), 8.16 (d, *J* = 7.9 Hz, 1H), 8.00 (d, *J* = 5.1 Hz, 1H), 7.89 (dd, *J*<sub>1</sub> = 7.9 Hz, *J*<sub>2</sub> = 8.0 Hz, 1H), 7.55-7.63 (m, 2H), 7.27-7.36 (m, 2H). <sup>13</sup>C NMR (CDCl<sub>3</sub>, 100 MHz) δ 157.98, 148.26, 140.63, 138.14, 138.09, 136.85, 134.77, 130.48, 128.44, 122.92, 121.69, 121.30, 121.15, 119.80, 115.47, 111.88. HRMS (ESI) *m/z* calcd for C<sub>16</sub>H<sub>12</sub>N<sub>3</sub> [M+H]<sup>+</sup>: 246.1031, found: 246.1032. IR (KBr film) 3397, 3296, 3060, 2922, 1627, 1590, 1566, 1438, 1448, 1417, 1318, 1236, 1149, 799, 743 cm<sup>-1</sup>.

### 1-Methyl-9H-pyrido[3,4-b]indole 2j:

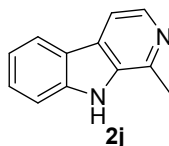

Pale yellow solid, mp 221-222 °C. <sup>1</sup>H NMR (CDCl<sub>3</sub>, 400 MHz) δ 9.66 (s, 1H, NH in indole), 8.38 (d, *J* = 5.4 Hz, 1H), 8.12 (d, *J* = 7.9 Hz, 1H), 7.84 (d, *J* = 5.4 Hz, 1H), 7.46-7.54 (m, 2H), 7.25-7.30 (m, 1H), 2.83 (s, 3H). <sup>13</sup>C NMR (CDCl<sub>3</sub>, 100 MHz) δ 141.82, 140.24, 138.51, 134.68, 128.34, 128.23, 122.02, 121.84, 120.07, 112.96, 111.62, 20.31. HRMS (ESI) *m/z* calcd for C<sub>12</sub>H<sub>11</sub>N<sub>2</sub> [M+H]<sup>+</sup>: 183.0922, found: 183.0926. IR (KBr film) 3128, 3063, 2954, 2854, 1625, 1565, 1507, 1255, 1237, 741 cm<sup>-1</sup>.

### 1-Ethyl-9H-pyrido[3,4-b]indole 2k:

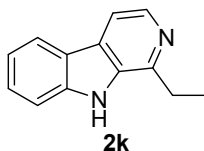

White solid, mp 195-196 °C. <sup>1</sup>H NMR (DMSO-*d*<sub>6</sub>, 400 MHz) δ 11.62 (s, 1H, NH in indole), 8.27 (d, *J* = 5.3 Hz, 1H), 8.16 (d, *J* = 7.9 Hz, 1H), 7.90 (d, *J* = 5.3 Hz, 1H), 7.62 (d, *J* = 8.2 Hz, 1H), 7.53 (dd, *J*<sub>1</sub> = 8.2 Hz, *J*<sub>2</sub> = 8.0 Hz, 1H), 7.21 (dd, *J*<sub>1</sub> = 7.9 Hz, *J*<sub>2</sub> = 8.0 Hz, 1H), 3.17 (q, *J* = 7.5 Hz, 2H), 1.39 (t, *J* = 7.5 Hz, 3H). <sup>13</sup>C NMR (DMSO-*d*<sub>6</sub>, 100 MHz) δ 147.36, 140.86, 138.00, 134.26, 128.20, 127.59, 122.03, 121.61, 119.57, 113.05, 112.38, 27.14, 13.13. HRMS (ESI) *m/z* calcd for C<sub>13</sub>H<sub>13</sub>N<sub>2</sub> [M+H]<sup>+</sup>: 197.1079, found: 197.1082. IR (KBr film) 3171, 2926, 2855, 1626, 1458, 1430, 1401, 1324, 1240, 1155, 745 cm<sup>-1</sup>.

### 3-Methyl-1-phenyl-9H-pyrido[3,4-*b*]indole 2l:

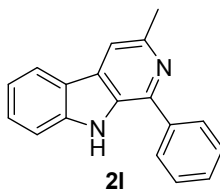

Pale yellow solid, mp. 128-129 °C. <sup>1</sup>H NMR (CDCl<sub>3</sub>, 400 MHz) δ 8.51 (s, 1H, *NH* in indole), 8.08 (d, *J* = 7.9 Hz, 1H), 7.88 (d, *J* = 7.2 Hz, 2H), 7.74 (s, 1H), 7.45-7.55 (m, 3H), 7.36-7.42 (m, 2H), 7.23 (t, *J* = 7.2 Hz, 1H), 2.76 (s, 3H). <sup>13</sup>C NMR (CDCl<sub>3</sub>, 100 MHz) δ 147.85, 141.98, 140.83, 138.60, 131.91, 130.87, 129.15 (2C), 128.66, 128.38, 128.23 (2C), 121.76, 119.96, 112.71, 111.49, 24.39. HRMS (ESI) *m/z* calcd for C<sub>18</sub>H<sub>15</sub>N<sub>2</sub> [M+H]<sup>+</sup>: 259.1235, found: 259.1242. IR (KBr film) 3132, 3064, 2916, 1625, 1561, 1496, 1452, 1440, 1320, 1241, 742, 703 cm<sup>-1</sup>.

### 1-(4-Methoxyphenyl)-3-methyl-9H-pyrido[3,4-*b*]indole 2m:

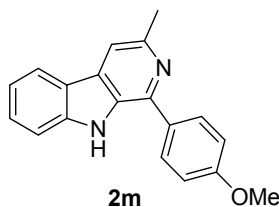

Pale yellow solid, mp. 131-132 °C. <sup>1</sup>H NMR (CDCl<sub>3</sub>, 400 MHz) δ 8.82 (s, 1H, *NH* in indole), 8.05 (d, *J* = 7.9 Hz, 1H), 7.76 (d, *J* = 8.2 Hz, 2H), 7.68 (s, 1H), 7.46 (dd, *J*<sub>1</sub> = 7.9 Hz, *J*<sub>2</sub> = 8.0 Hz, 1H), 7.38 (d, *J* = 8.1 Hz, 1H), 7.22 (dd, *J*<sub>1</sub> = 8.0 Hz, *J*<sub>2</sub> = 8.1 Hz, 1H), 6.90 (d, *J* = 8.2 Hz, 2H), 3.72 (s, 3H), 2.73 (s, 3H). <sup>13</sup>C NMR (CDCl<sub>3</sub>, 100 MHz) δ 159.85, 147.56, 141.97, 140.96, 131.87, 131.15, 130.69, 129.46 (2C), 128.19, 121.80, 121.67, 119.78, 114.34 (2C), 112.21, 111.55, 55.29, 24.31. HRMS (EI) *m/z* calcd for C<sub>19</sub>H<sub>17</sub>N<sub>2</sub>O [M+H]<sup>+</sup>: 289.1341, found: 289.1340. IR (KBr film) 3126, 3055, 2918, 1624, 1611, 1563, 1513, 1251, 1237, 744, 586 cm<sup>-1</sup>.

### 3-Methyl-1-(thiophen-2-yl)-9H-pyrido[3,4-*b*]indole 2n:

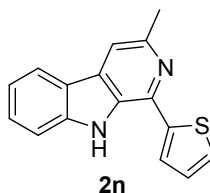

Pale yellow solid, mp. 161-162 °C. <sup>1</sup>H NMR (CDCl<sub>3</sub>, 400 MHz) δ 8.54 (s, 1H, *NH* in indole), 8.08 (d, *J* = 7.9 Hz, 1H), 7.72 (s, 1H), 7.71 (d, *J* = 4.8 Hz, 1H), 7.45-7.55 (m, 3H), 7.29 (d, *J* = 7.8 Hz, 1H), 7.20 (dd, *J*<sub>1</sub> = 4.8 Hz, *J*<sub>2</sub> = 3.7 Hz, 1H), 2.75 (s, 3H). <sup>13</sup>C NMR (CDCl<sub>3</sub>, 100 MHz) δ 147.89, 142.84, 140.94, 135.89, 131.44, 130.76, 128.52, 127.98, 126.95, 125.11, 121.79, 121.71, 120.27, 112.82, 111.69, 24.29.

HRMS (ESI)  $m/z$  calcd for  $C_{16}H_{13}N_2S$   $[M+H]^+$ : 265.0799, found: 265.0796. IR (KBr film) 3344, 3062, 2911, 1624, 1558, 1493, 1438, 1323, 1236, 740, 711  $cm^{-1}$ .

**Methyl 1-phenyl-9H-pyrido[3,4-*b*]indole-3-carboxylate 2o:**

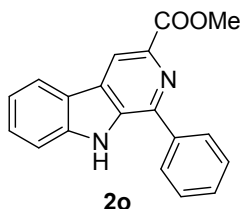

White solid, mp 256-257 °C.  $^1H$  NMR (DMSO- $d_6$ , 400 MHz)  $\delta$  11.92 (s, 1H, *NH* in indole), 8.92 (s, 1H), 8.42 (d,  $J = 8.0$  Hz, 1H), 8.05 (d,  $J = 7.9$  Hz, 2H), 7.70 (d,  $J = 8.0$  Hz, 1H), 7.52-7.66 (m, 4H), 7.33 (dd,  $J_1 = 8.0$  Hz,  $J_2 = 7.9$  Hz, 1H), 3.94 (s, 3H).  $^{13}C$  NMR (DMSO- $d_6$ , 100 MHz)  $\delta$  166.57, 142.56, 142.21, 138.08, 136.98, 135.29, 129.65, 129.38, 129.20 (2C), 129.11 (2C), 129.03, 122.39, 121.64, 120.75, 117.13, 113.35, 52.48. HRMS (ESI)  $m/z$  calcd for  $C_{19}H_{15}N_2O_2$   $[M+H]^+$ : 303.1134, found: 303.1136. IR (KBr film) 3319, 2952, 1723, 1626, 1352, 1253, 1217, 1103, 1049, 740  $cm^{-1}$ .

**Methyl 1-(4-methoxyphenyl)-9H-pyrido[3,4-*b*]indole-3-carboxylate 2p:**

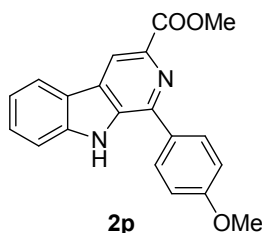

White solid, mp 229-230 °C.  $^1H$  NMR (DMSO- $d_6$ , 400 MHz)  $\delta$  11.89 (s, 1H, *NH* in indole), 8.88 (s, 1H), 8.41 (d,  $J = 7.6$  Hz, 1H), 7.99 (d,  $J = 8.6$  Hz, 2H), 7.70 (d,  $J = 7.9$  Hz, 1H), 7.60 (dd,  $J_1 = 7.9$  Hz,  $J_2 = 7.8$  Hz, 1H), 7.32 (dd,  $J_1 = 7.6$  Hz,  $J_2 = 7.8$  Hz, 1H), 7.20 (d,  $J = 8.6$  Hz, 2H), 3.93 (s, 3H), 3.88 (s, 3H).  $^{13}C$  NMR (DMSO- $d_6$ , 100 MHz)  $\delta$  166.59, 160.41, 142.46, 141.90, 137.07, 134.84, 130.46, 130.43 (2C), 129.44, 128.99, 122.38, 121.66, 120.79, 116.64, 114.63 (2C), 113.24, 55.80, 52.46. HRMS (ESI)  $m/z$  calcd for  $C_{20}H_{17}N_2O_3$   $[M+H]^+$ : 333.1239, found: 333.1241. IR (KBr film) 3254, 2951, 2837, 1714, 1611, 1514, 1434, 1353, 1251, 1177, 1116, 1032, 746  $cm^{-1}$ .

**Ethyl 1-(3,4-dimethoxyphenyl)-9H-pyrido[3,4-*b*]indole-3-carboxylate 2q:**

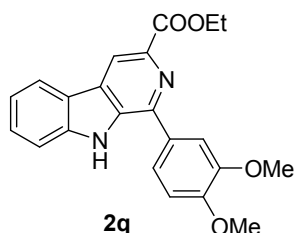

White solid, mp 217-218 °C. <sup>1</sup>H NMR (DMSO-*d*<sub>6</sub>, 400 MHz) δ 11.89 (s, 1H, *NH* in indole), 8.87 (s, 1H), 8.41 (d, *J* = 7.9 Hz, 1H), 7.70 (d, *J* = 8.1 Hz, 1H), 7.54-7.64 (m, 3H), 7.32 (dd, *J*<sub>1</sub> = 7.9 Hz, *J*<sub>2</sub> = 8.0 Hz, 1H), 7.21 (d, *J* = 7.9 Hz, 1H), 4.41 (q, *J* = 7.1 Hz, 2H), 3.91 (s, 3H), 3.89 (s, 3H), 1.39 (t, *J* = 7.1 Hz, 3H). <sup>13</sup>C NMR (DMSO-*d*<sub>6</sub>, 100 MHz) δ 166.04, 150.10, 149.30, 142.73, 141.89, 137.28, 134.94, 130.69, 129.35, 128.95, 122.37, 121.70, 121.71, 120.76, 116.59, 113.24, 112.55, 112.31, 61.06, 56.16, 55.95, 14.83. HRMS (ESI) *m/z* calcd for C<sub>22</sub>H<sub>21</sub>N<sub>2</sub>O<sub>4</sub> [M+H]<sup>+</sup>: 377.1501, found: 377.1502. IR (KBr film) 3423, 2937, 1709, 1626, 1516, 1371, 1348, 1257, 1143, 1025, 746 cm<sup>-1</sup>.

**Ethyl 1-(3-(trifluoromethyl)phenyl)-9*H*-pyrido[3,4-*b*]indole-3-carboxylate 2r:**

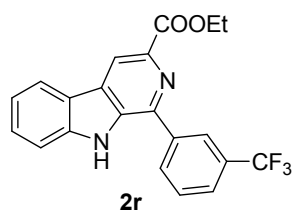

White solid, mp 209-210 °C. <sup>1</sup>H NMR (DMSO-*d*<sub>6</sub>, 400 MHz) δ 12.06 (s, 1H, *NH* in indole), 8.96 (s, 1H), 8.45 (d, *J* = 7.9 Hz, 1H), 8.32 (d, *J* = 7.6 Hz, 1H), 8.27 (s, 1H), 7.86-7.94 (m, 2H), 7.70 (d, *J* = 8.0 Hz, 1H), 7.63 (dd, *J*<sub>1</sub> = 7.8 Hz, *J*<sub>2</sub> = 7.9 Hz, 1H), 7.35 (dd, *J*<sub>1</sub> = 7.9 Hz, *J*<sub>2</sub> = 8.0 Hz, 1H), 4.42 (q, *J* = 7.1 Hz, 2H), 1.39 (t, *J* = 7.1 Hz, 3H). <sup>13</sup>C NMR (DMSO-*d*<sub>6</sub>, 100 MHz) δ 165.77, 142.03, 140.77, 138.92, 137.47, 135.10, 132.99, 130.34, 130.07 (q, <sup>2</sup>*J*<sub>CF</sub> = 31.0 Hz), 130.05, 129.31, 126.00 (q, <sup>3</sup>*J*<sub>CF</sub> = 4.1 Hz), 125.61 (q, <sup>3</sup>*J*<sub>CF</sub> = 4.1 Hz), 124.68 (q, <sup>1</sup>*J*<sub>CF</sub> = 271.0 Hz), 122.51, 121.56, 120.97, 117.55, 113.17, 61.17, 14.78. HRMS (ESI) *m/z* calcd for C<sub>21</sub>H<sub>16</sub>F<sub>3</sub>N<sub>2</sub>O<sub>2</sub> [M+H]<sup>+</sup>: 385.1164, found: 385.1160. IR (KBr film) 3260, 3058, 2988, 2908, 1724, 1624, 1567, 1454, 1373, 1330, 1255, 1160, 1120, 1095, 742, 541 cm<sup>-1</sup>.

**Ethyl 1-(naphthalen-1-yl)-9*H*-pyrido[3,4-*b*]indole-3-carboxylate 2s:**

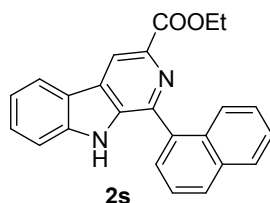

White solid, mp 275-276 °C. <sup>1</sup>H NMR (DMSO-*d*<sub>6</sub>, 400 MHz) δ 11.63 (s, 1H, *NH* in indole), 9.03 (s, 1H), 8.47 (d, *J* = 7.9 Hz, 1H), 8.16 (d, *J* = 7.8 Hz, 1H), 8.10 (d, *J* = 8.0 Hz, 1H), 7.72-7.78 (m, 2H), 7.53-7.60 (m, 4H), 7.44 (dd, *J*<sub>1</sub> = 7.8 Hz, *J*<sub>2</sub> = 7.9 Hz, 1H), 7.32 (dd, *J*<sub>1</sub> = 7.9 Hz, *J*<sub>2</sub> = 8.0 Hz, 1H), 4.39 (q, *J* = 7.1 Hz, 2H), 1.35 (t, *J* = 7.1 Hz, 3H). <sup>13</sup>C NMR (DMSO-*d*<sub>6</sub>, 100 MHz) δ 166.12, 143.02, 141.89, 137.13, 136.84, 135.31, 134.02, 131.70, 129.50, 129.10, 128.95, 128.83, 128.16, 127.05, 126.62, 126.13, 125.80, 122.59, 121.67, 120.76, 117.44, 113.12, 61.12, 14.85. HRMS (ESI) *m/z* calcd for C<sub>24</sub>H<sub>19</sub>N<sub>2</sub>O<sub>2</sub> [M+H]<sup>+</sup>: 367.1447, found: 367.1445. IR (KBr film) 3408, 3234, 2982, 1712, 1626, 1502, 1345, 1226, 752 cm<sup>-1</sup>.



**Ethyl 1-(thiophen-2-yl)-9H-pyrido[3,4-b]indole-3-carboxylate 2t:**

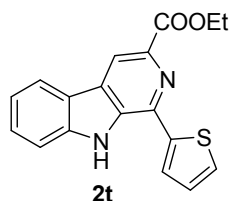

White solid, mp 162-163 °C. <sup>1</sup>H NMR (DMSO-*d*<sub>6</sub>, 400 MHz) δ 11.90 (s, 1H, NH in indole), 8.85 (s, 1H), 8.42 (d, *J* = 7.9 Hz, 1H), 8.15 (d, *J* = 3.6 Hz, 1H), 7.75-7.81 (m, 2H), 7.63 (dd, *J*<sub>1</sub> = 7.9 Hz, *J*<sub>2</sub> = 8.0 Hz, 1H), 7.32-7.38 (m, 2H), 4.41 (q, *J* = 7.1 Hz, 2H), 1.40 (t, *J* = 7.1 Hz, 3H). <sup>13</sup>C NMR (DMSO-*d*<sub>6</sub>, 100 MHz) δ 165.55, 142.91, 142.01, 137.05, 136.80, 132.89, 130.20, 129.29, 129.28, 128.87, 127.09, 122.38, 121.54, 121.14, 116.81, 113.38, 61.18, 14.82. HRMS (ESI) *m/z* calcd for C<sub>18</sub>H<sub>15</sub>N<sub>2</sub>O<sub>2</sub>S [M+H]<sup>+</sup>: 323.0854, found: 323.0853. IR (KBr film) 3345, 3094, 2987, 2925, 1708, 1672, 1624, 1563, 1368, 1330, 1254, 1097, 1024, 740, 524 cm<sup>-1</sup>.

**Ethyl 1-methyl-9H-pyrido[3,4-b]indole-3-carboxylate 2u:**

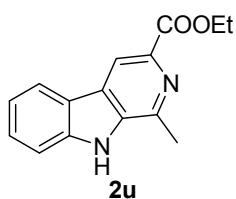

White solid, mp 217-218 °C. <sup>1</sup>H NMR (DMSO-*d*<sub>6</sub>, 400 MHz) δ 12.04 (s, 1H, NH in indole), 8.77 (s, 1H), 8.36 (d, *J* = 7.9 Hz, 1H), 7.67 (d, *J* = 8.1 Hz, 1H), 7.60 (dd, *J*<sub>1</sub> = 7.9 Hz, *J*<sub>2</sub> = 8.0 Hz, 1H), 7.31 (dd, *J*<sub>1</sub> = 8.0 Hz, *J*<sub>2</sub> = 8.1 Hz, 1H), 4.38 (q, *J* = 7.1 Hz, 2H), 2.83 (s, 3H), 1.38 (t, *J* = 7.1 Hz, 3H). <sup>13</sup>C NMR (DMSO-*d*<sub>6</sub>, 100 MHz) δ 166.13, 142.59, 141.21, 136.68, 136.61, 128.75, 127.22, 122.48, 121.82, 120.54, 116.30, 112.75, 60.89, 20.83, 14.84. HRMS (ESI) *m/z* calcd for C<sub>15</sub>H<sub>15</sub>N<sub>2</sub>O<sub>2</sub> [M+H]<sup>+</sup>: 255.1134, found: 255.1142. IR (KBr film) 3317, 3041, 2978, 1709, 1624, 1596, 1568, 1500, 1345, 1256, 1239, 741 cm<sup>-1</sup>.

**Ethyl 1-ethyl-9H-pyrido[3,4-b]indole-3-carboxylate 2v:**

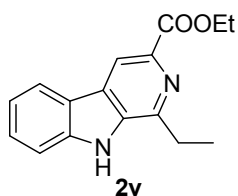

White solid, mp 210-211 °C. <sup>1</sup>H NMR (DMSO-*d*<sub>6</sub>, 400 MHz) δ 12.02 (s, 1H, NH in indole), 8.76 (s, 1H), 8.35 (d, *J* = 7.9 Hz, 1H), 7.65 (d, *J* = 8.1 Hz, 1H), 7.58 (dd, *J*<sub>1</sub> = 7.9 Hz, *J*<sub>2</sub> = 8.0 Hz, 1H), 7.29 (dd, *J*<sub>1</sub> = 8.1 Hz, *J*<sub>2</sub> = 8.0 Hz, 1H), 4.37 (q, *J* = 7.1 Hz, 2H), 3.17 (q, *J* = 7.5 Hz, 2H), 1.37 (t, *J* = 7.1 Hz, 3H), 1.36 (t, *J* = 7.5 Hz, 3H). <sup>13</sup>C NMR (DMSO-*d*<sub>6</sub>, 100 MHz) δ 166.14, 147.40, 141.23, 136.80, 135.85, 128.75,

127.53, 122.42, 121.83, 120.51, 116.34, 112.77, 60.88, 27.27, 14.85, 13.19. HRMS (ESI)  $m/z$  calcd for  $C_{16}H_{17}N_2O_2$   $[M+H]^+$ : 269.1290, found: 269.1295. IR (KBr film) 3328, 2994, 2929, 1704, 1565, 1498, 1366, 1346, 1258, 1235, 1046, 749  $cm^{-1}$ .

**Ethyl 6-ethoxy-1-phenyl-9H-pyrido[3,4-b]indole-3-carboxylate 2w:**

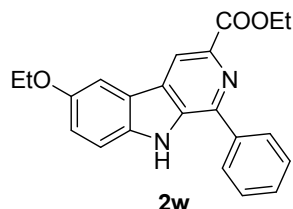

Pale yellow solid, m.p.: 228-229 °C.  $^1H$  NMR (400 MHz,  $DMSO-d_6$ )  $\delta$  11.75 (s, 1H, *NH* in indole), 8.92 (s, 1H), 8.06–7.96 (m, 3H), 7.64 (d,  $J = 7.4$  Hz, 2H), 7.61–7.53 (m, 2H), 7.22 (d,  $J = 8.9$  Hz, 1H), 4.41 (q,  $J = 7.1$  Hz, 2H), 4.15 (q,  $J = 6.9$  Hz, 2H), 1.40 (t,  $J = 6.9$  Hz, 3H), 1.39 (t,  $J = 7.1$  Hz, 3H).  $^{13}C$  NMR (100 MHz,  $DMSO-d_6$ )  $\delta$  165.62, 153.35, 142.09, 137.69, 136.34, 136.21, 134.96, 129.00, 128.96, 128.81, 128.59, 121.65, 119.29, 116.94, 113.63, 104.29, 63.61, 60.61, 14.83, 14.45. IR (KBr film) 3448, 3227, 2980, 1712 (C=O), 1525, 1462, 1306, 1206, 1151, 1103, 1027, 725, 696  $cm^{-1}$ . HRMS (ESI)  $m/z$  calcd for  $C_{22}H_{21}N_2O_3$   $[M+H]^+$ : 361.1552; found: 361.1549.

**Ethyl 1-(3,4-dimethoxyphenyl)-6-methoxy-4,9-dihydro-3H-pyrido[3,4-b]indole-3-carboxylate 2x:**

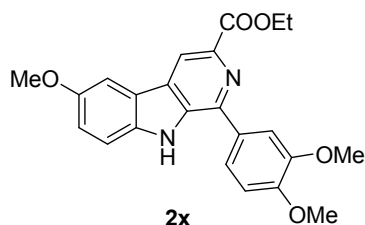

Pale yellow solid, m.p.: 207-208 °C.  $^1H$  NMR (400 MHz,  $DMSO-d_6$ )  $\delta$  11.72 (s, 1H, *NH* in indole), 8.88 (s, 1H), 8.00 (s, 1H), 7.69–7.42 (m, 3H), 7.23 (d,  $J = 8.9$  Hz, 1H), 7.20 (d,  $J = 8.9$  Hz, 1H), 4.40 (q,  $J = 7.1$  Hz, 2H), 3.90 (s, 3H), 3.89 (s, 3H), 3.88 (s, 3H), 1.39 (t,  $J = 7.1$  Hz, 3H).  $^{13}C$  NMR (100 MHz,  $DMSO-d_6$ )  $\delta$  165.66, 154.14, 149.63, 148.84, 142.32, 136.22, 136.21, 134.90, 130.32, 128.75, 121.73, 121.20, 118.80, 116.48, 113.67, 112.02, 111.82, 103.50, 60.60, 55.71, 55.66, 55.51, 14.44. IR (KBr film) 3449, 3262, 2937, 1704 (C=O), 1514, 1495, 1463, 1303, 1266, 1240, 1219, 1104, 1033, 778, 759  $cm^{-1}$ . HRMS (ESI)  $m/z$  calcd for  $C_{23}H_{23}N_2O_5$   $[M+H]^+$ : 407.1607; found: 407.1609.

## 2. <sup>1</sup>H and <sup>13</sup>C NMR Spectra of All Compounds:

<sup>1</sup>H NMR (DMSO-*d*<sub>6</sub>, 400 MHz) spectrum of compound **2a**:

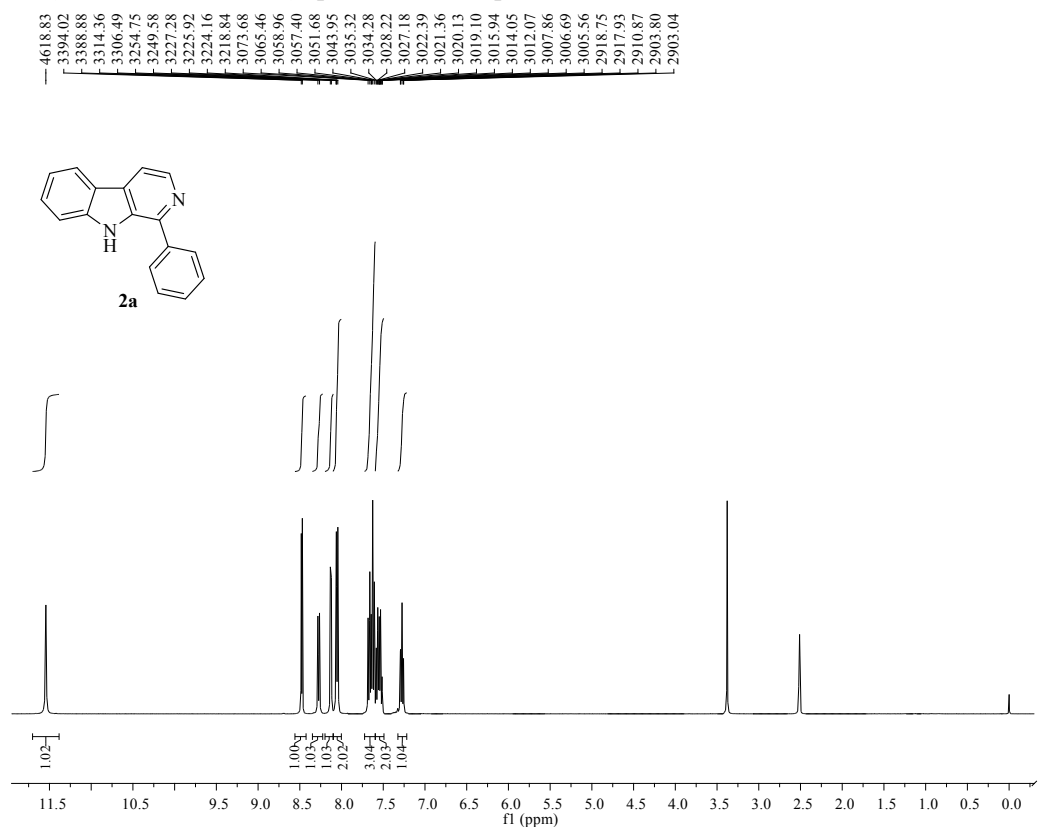

```

NAME      sxx-zjh-23
EXPNO    10
PROCNO   1
Date_    20120513
Time     11.01
INSTRUM  spect
PROBHD   5 mm PABBO BB-
PULPROG  zg30
TD        65536
SOLVENT  DMSO
NS        16
DS         0
SWH       8223.685 Hz
FIDRES   0.125483 Hz
AQ        3.9846387 sec
RG         128
DW        60.800 usec
DE         6.50 usec
TE        295.0 K
D1        1.00000000 sec
TD0       1
    
```

```

===== CHANNEL f1 =====
NUC1      1H
P1        14.90 usec
PL1       -1.00 dB
PL1W      13.37643433 W
SFO1      400.1324710 MHz
SI         32768
SF        400.1299987 MHz
WDW       EM
SSB        0
LB         0.30 Hz
GB         0
PC         1.00
    
```

<sup>13</sup>C NMR (DMSO-*d*<sub>6</sub>, 100 MHz) spectrum of compound **2a**:

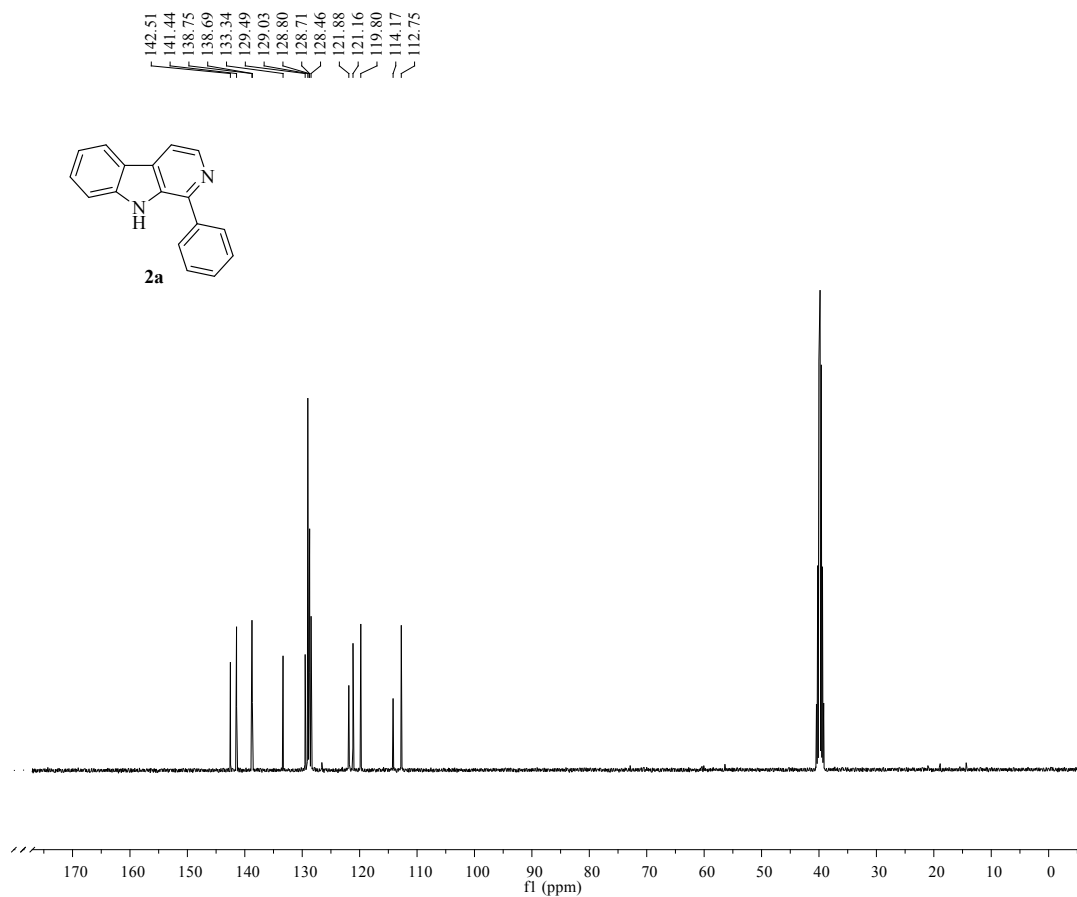

```

NAME      sxx-zjh-23
EXPNO    10
PROCNO   1
Date_    20120520
Time     13.47
INSTRUM  spect
PROBHD   5 mm PABBO BB-
PULPROG  zgpg30
TD        65536
SOLVENT  DMSO
NS        400
DS         0
SWH       24038.461 Hz
FIDRES   0.366798 Hz
AQ        1.3631988 sec
RG         203
DW        20.800 usec
DE         6.50 usec
TE        295.0 K
D1        2.00000000 sec
D11       0.03000000 sec
TD0       1
    
```

```

===== CHANNEL f1 =====
NUC1      13C
P1         9.00 usec
PL1       -2.00 dB
PL1W      57.32743073 W
SFO1      100.6228298 MHz

===== CHANNEL f2 =====
CPDPRG2  waltz16
NUC2      1H
PCPD2     90.00 usec
PL2       -1.00 dB
PL12      14.90 dB
PL13      17.90 dB
PL2W      13.37643433 W
PL12W     0.34382734 W
PL13W     0.17232187 W
SFO2      400.1316005 MHz
SI         32768
SF        100.6127690 MHz
WDW       EM
SSB        0
LB         1.00 Hz
GB         0
PC         1.00
    
```

<sup>1</sup>H NMR (DMSO-*d*<sub>6</sub>, 400 MHz) spectrum of compound **2b**:

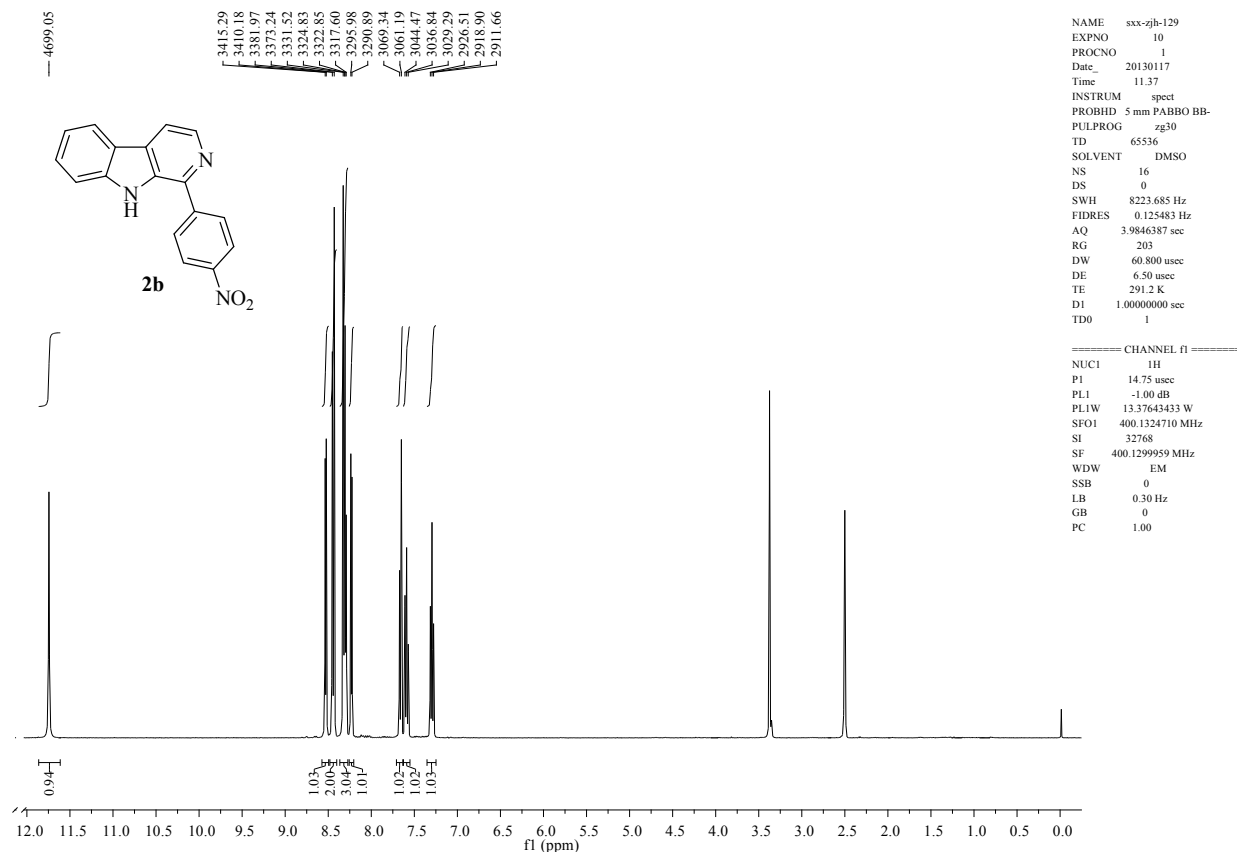

<sup>13</sup>C NMR (DMSO-*d*<sub>6</sub>, 100 MHz) spectrum of compound **2b**:

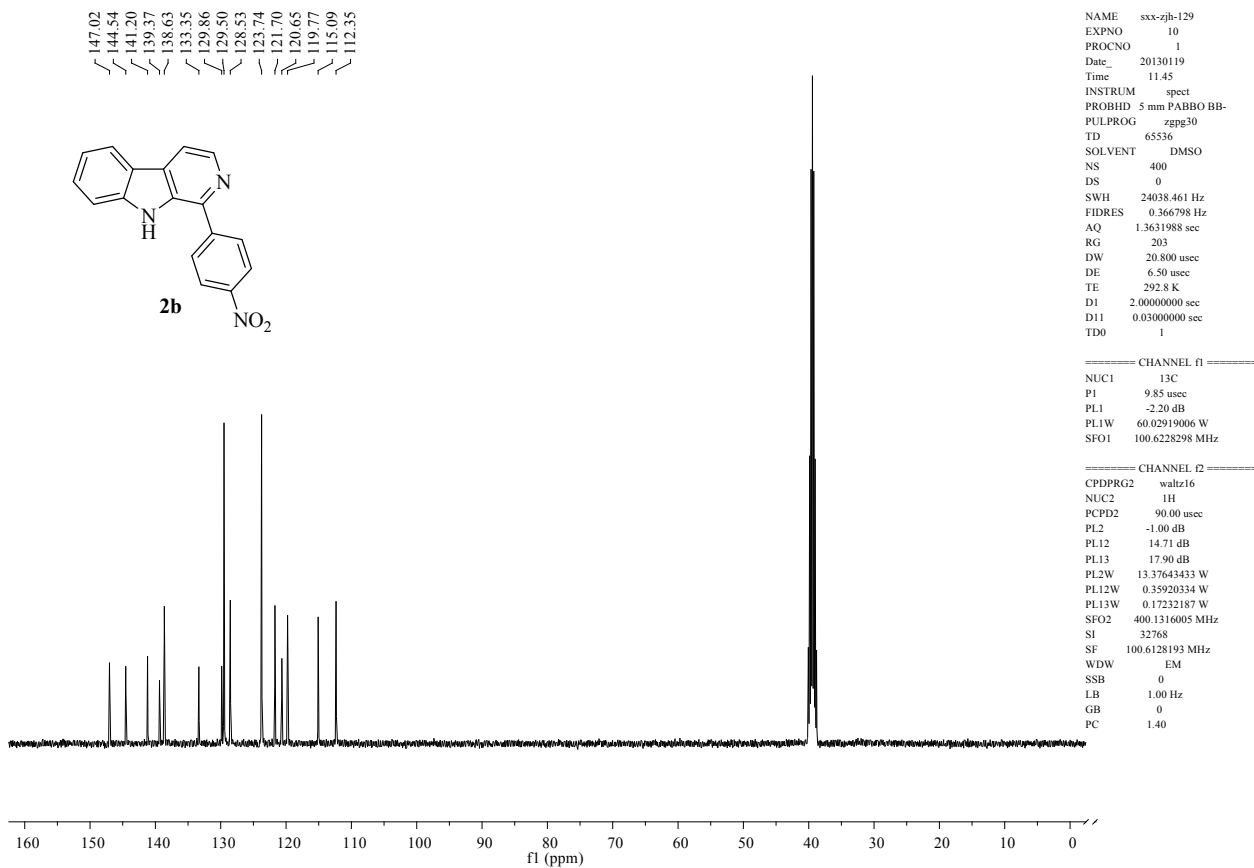

<sup>1</sup>H NMR (CDCl<sub>3</sub>, 400 MHz) spectrum of compound **2c**:

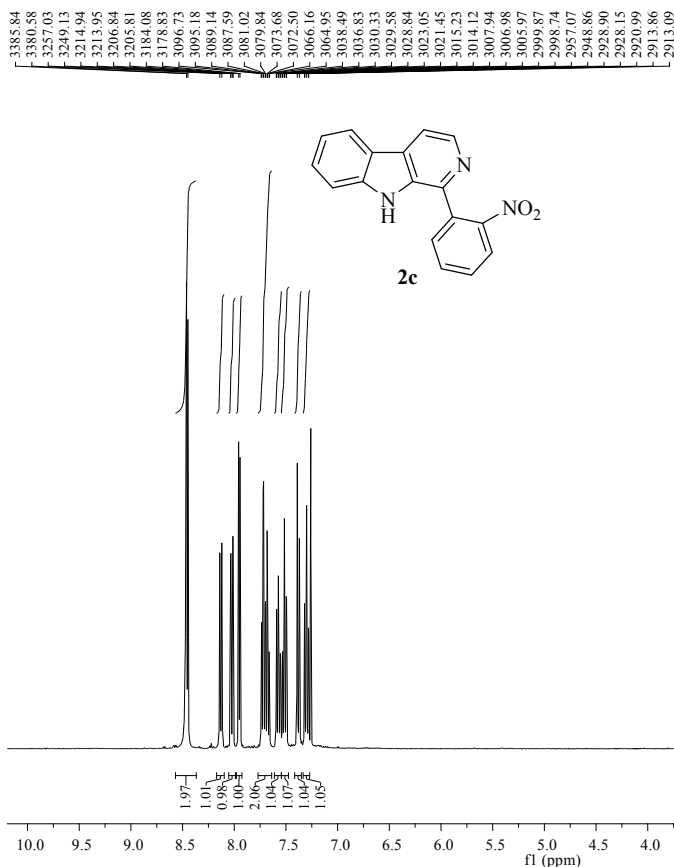

```

NAME SXX-ZJH-135
EXPNO 1
PROCNO 1
Date_ 20130419
Time 7.47
INSTRUM spect
PROBHD 5 mm PABBO BB-
PULPROG zg30
TD 65536
SOLVENT CDCl3
NS 16
DS 2
SWH 8223.685 Hz
FIDRES 0.125483 Hz
AQ 3.9846387 sec
RG 406
DW 60.800 usec
DE 6.50 usec
TE 298.2 K
D1 1.00000000 sec
TD0 1
  
```

```

===== CHANNEL f1 =====
NUC1 1H
P1 13.30 usec
PL1 -2.00 dB
PL1W 15.28731537 W
SFO1 400.1324710 MHz
SI 32768
SF 400.1300112 MHz
WDW EM
SSB 0
LB 0.30 Hz
GB 0
PC 1.00
  
```

<sup>13</sup>C NMR (DMSO-*d*<sub>6</sub>, 100 MHz) spectrum of compound **2c**:

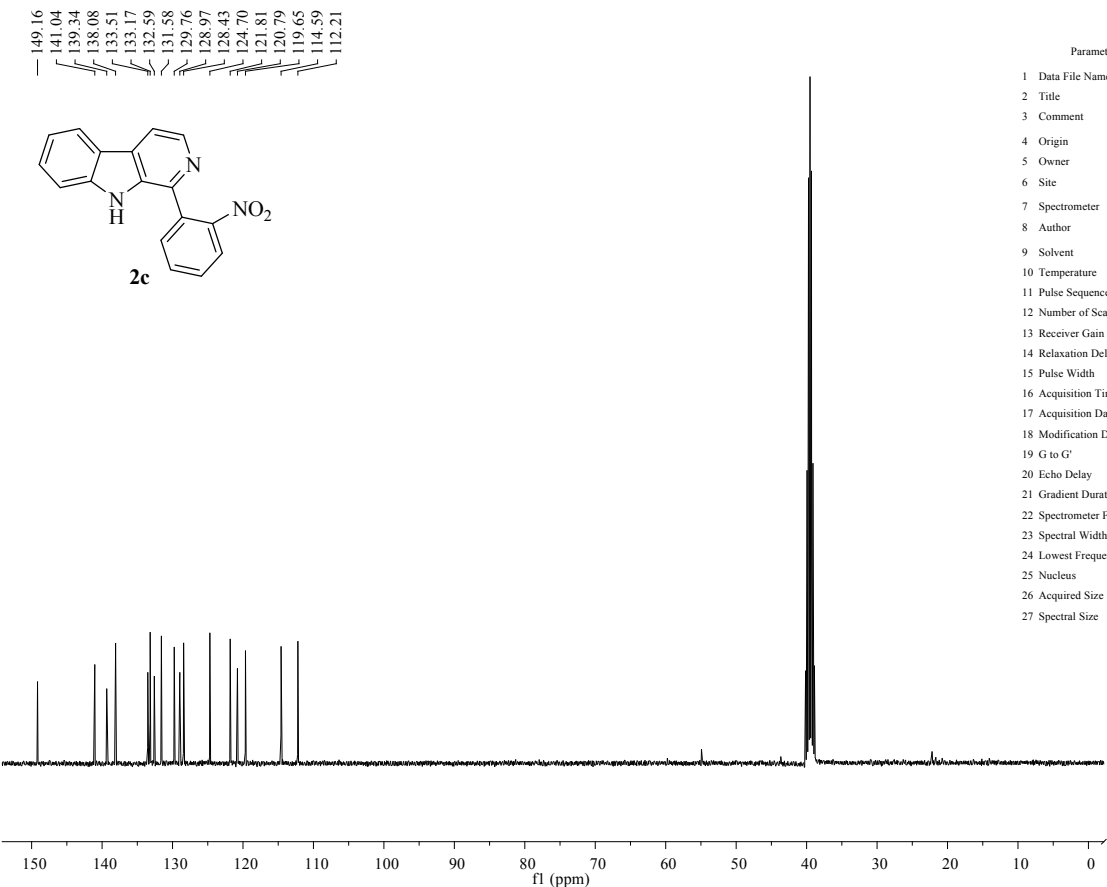

| Parameter                 | Value               |
|---------------------------|---------------------|
| 1 Data File Name          | SXX-ZJH-135         |
| 2 Title                   | SXX-ZJH-135         |
| 3 Comment                 |                     |
| 4 Origin                  | Bruker BioSpin GmbH |
| 5 Owner                   | nmr                 |
| 6 Site                    |                     |
| 7 Spectrometer            | spect               |
| 8 Author                  |                     |
| 9 Solvent                 | DMSO                |
| 10 Temperature            | 296.9               |
| 11 Pulse Sequence         | zgpg30              |
| 12 Number of Scans        | 512                 |
| 13 Receiver Gain          | 362                 |
| 14 Relaxation Delay       | 2.0000              |
| 15 Pulse Width            | 9.4000              |
| 16 Acquisition Time       | 1.3631              |
| 17 Acquisition Date       | 2013-04-23T21:05:59 |
| 18 Modification Date      | 2013-04-23T21:06:00 |
| 19 G to G'                | 1.00000000          |
| 20 Echo Delay             | 0.0000              |
| 21 Gradient Duration      | 0.0000              |
| 22 Spectrometer Frequency | 100.62              |
| 23 Spectral Width         | 24038.5             |
| 24 Lowest Frequency       | -2004.3             |
| 25 Nucleus                | 13C                 |
| 26 Acquired Size          | 32768               |
| 27 Spectral Size          | 65536               |

<sup>1</sup>H NMR (DMSO-*d*<sub>6</sub>, 400 MHz) spectrum of compound **2d**:

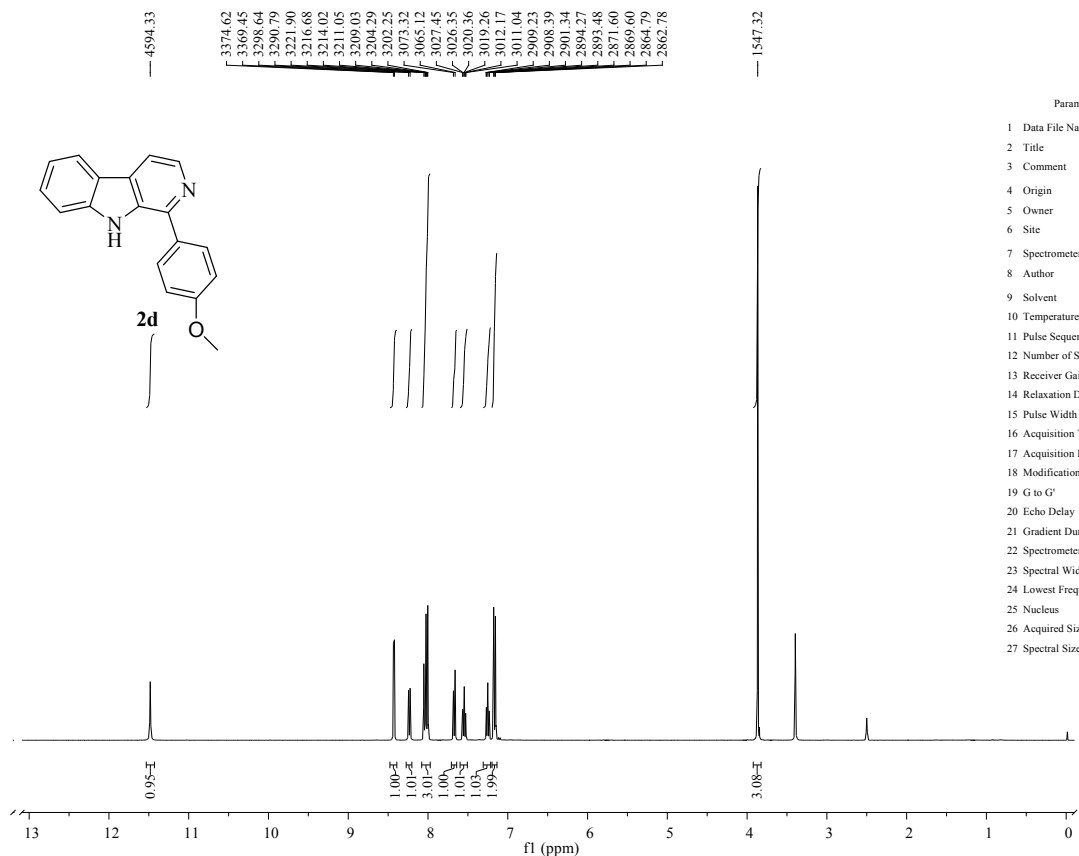

| Parameter                 | Value               |
|---------------------------|---------------------|
| 1 Data File Name          | SXX-ZJH-157-H       |
| 2 Title                   | SXX-ZJH-157-H       |
| 3 Comment                 |                     |
| 4 Origin                  | Bruker BioSpin GmbH |
| 5 Owner                   | nmr                 |
| 6 Site                    |                     |
| 7 Spectrometer            | spect               |
| 8 Author                  |                     |
| 9 Solvent                 | DMSO                |
| 10 Temperature            | 298.3               |
| 11 Pulse Sequence         | zg30                |
| 12 Number of Scans        | 16                  |
| 13 Receiver Gain          | 161                 |
| 14 Relaxation Delay       | 1.0000              |
| 15 Pulse Width            | 13.3000             |
| 16 Acquisition Time       | 3.9846              |
| 17 Acquisition Date       | 2013-05-01T23:01:42 |
| 18 Modification Date      | 2013-05-01T23:01:00 |
| 19 G to G'                | 1.00000000          |
| 20 Echo Delay             | 0.0000              |
| 21 Gradient Duration      | 0.0000              |
| 22 Spectrometer Frequency | 400.13              |
| 23 Spectral Width         | 8223.7              |
| 24 Lowest Frequency       | -1642.9             |
| 25 Nucleus                | 1H                  |
| 26 Acquired Size          | 32768               |
| 27 Spectral Size          | 65536               |

<sup>13</sup>C NMR (DMSO-*d*<sub>6</sub>, 100 MHz) spectrum of compound **2d**:

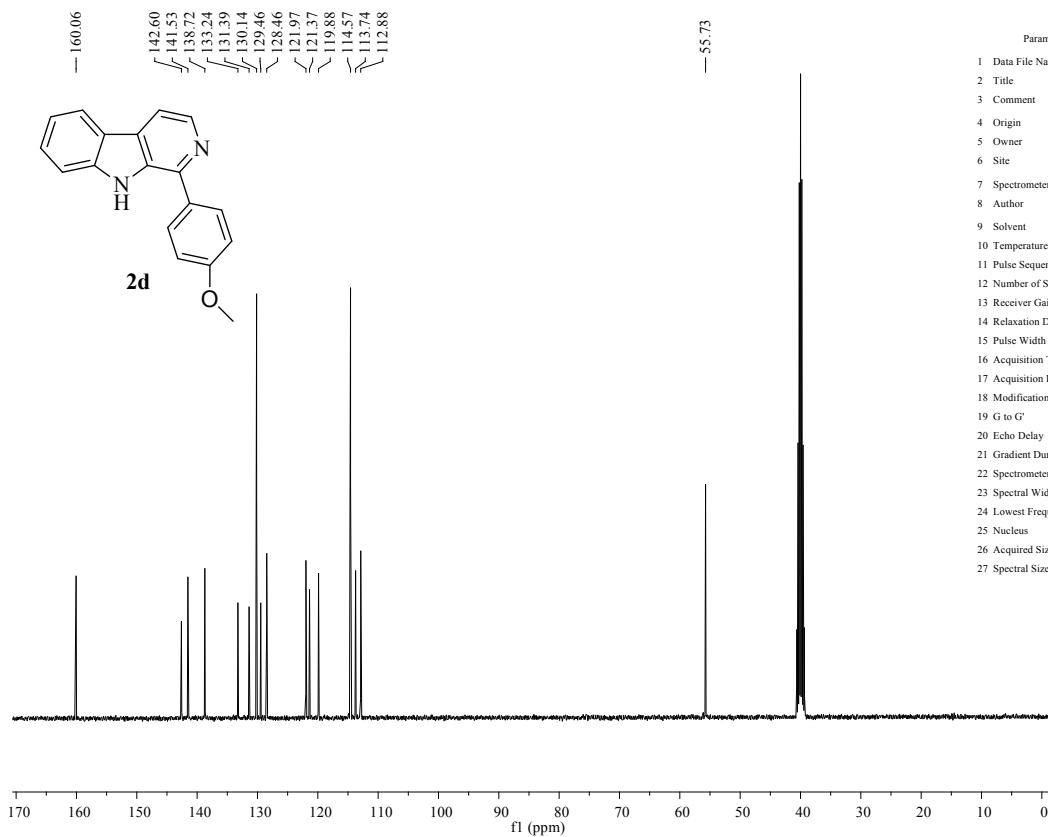

| Parameter                 | Value               |
|---------------------------|---------------------|
| 1 Data File Name          | SXX-ZJH-157-C       |
| 2 Title                   | SXX-ZJH-157-C       |
| 3 Comment                 |                     |
| 4 Origin                  | Bruker BioSpin GmbH |
| 5 Owner                   | nmr                 |
| 6 Site                    |                     |
| 7 Spectrometer            | spect               |
| 8 Author                  |                     |
| 9 Solvent                 | DMSO                |
| 10 Temperature            | 299.2               |
| 11 Pulse Sequence         | zgpg30              |
| 12 Number of Scans        | 500                 |
| 13 Receiver Gain          | 322                 |
| 14 Relaxation Delay       | 2.0000              |
| 15 Pulse Width            | 9.4000              |
| 16 Acquisition Time       | 1.3631              |
| 17 Acquisition Date       | 2013-05-01T23:32:58 |
| 18 Modification Date      | 2013-05-01T23:32:00 |
| 19 G to G'                | 1.00000000          |
| 20 Echo Delay             | 0.0000              |
| 21 Gradient Duration      | 0.0000              |
| 22 Spectrometer Frequency | 100.61              |
| 23 Spectral Width         | 24038.5             |
| 24 Lowest Frequency       | -1958.4             |
| 25 Nucleus                | 13C                 |
| 26 Acquired Size          | 32768               |
| 27 Spectral Size          | 65536               |

<sup>1</sup>H NMR (CDCl<sub>3</sub>, 400 MHz) spectrum of compound **2e**:

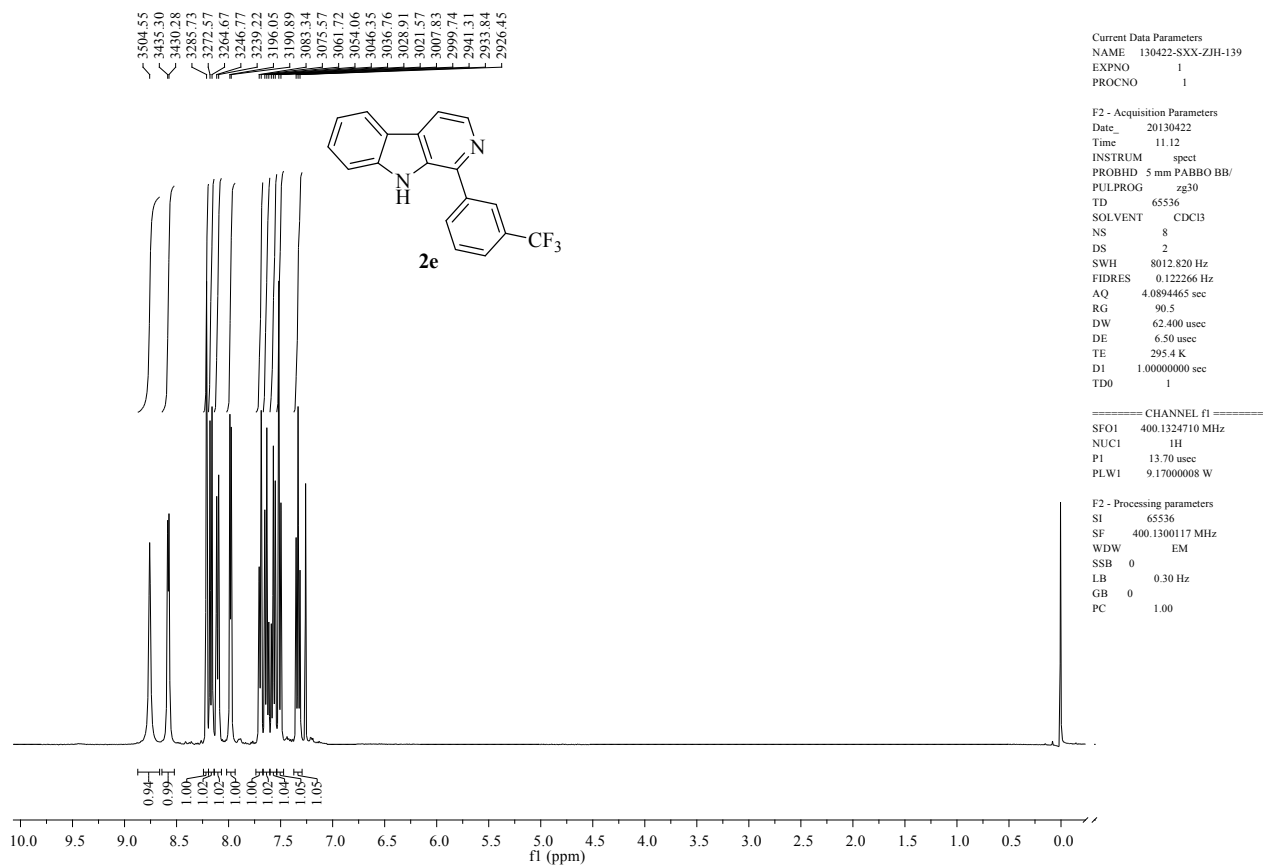

<sup>13</sup>C NMR (CDCl<sub>3</sub>, 100 MHz) spectrum of compound **2e**:

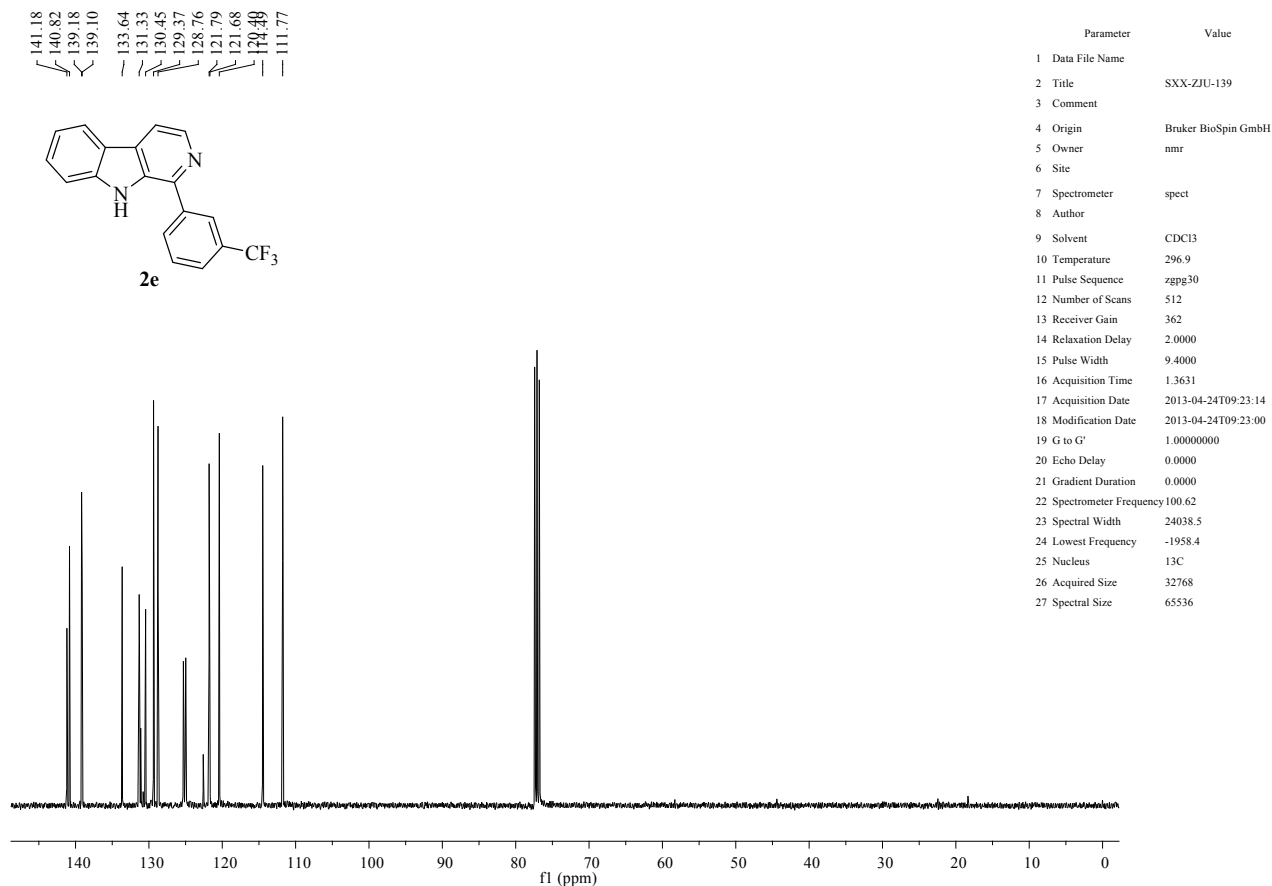

<sup>1</sup>H NMR (CDCl<sub>3</sub>, 400 MHz) spectrum of compound **2f**:

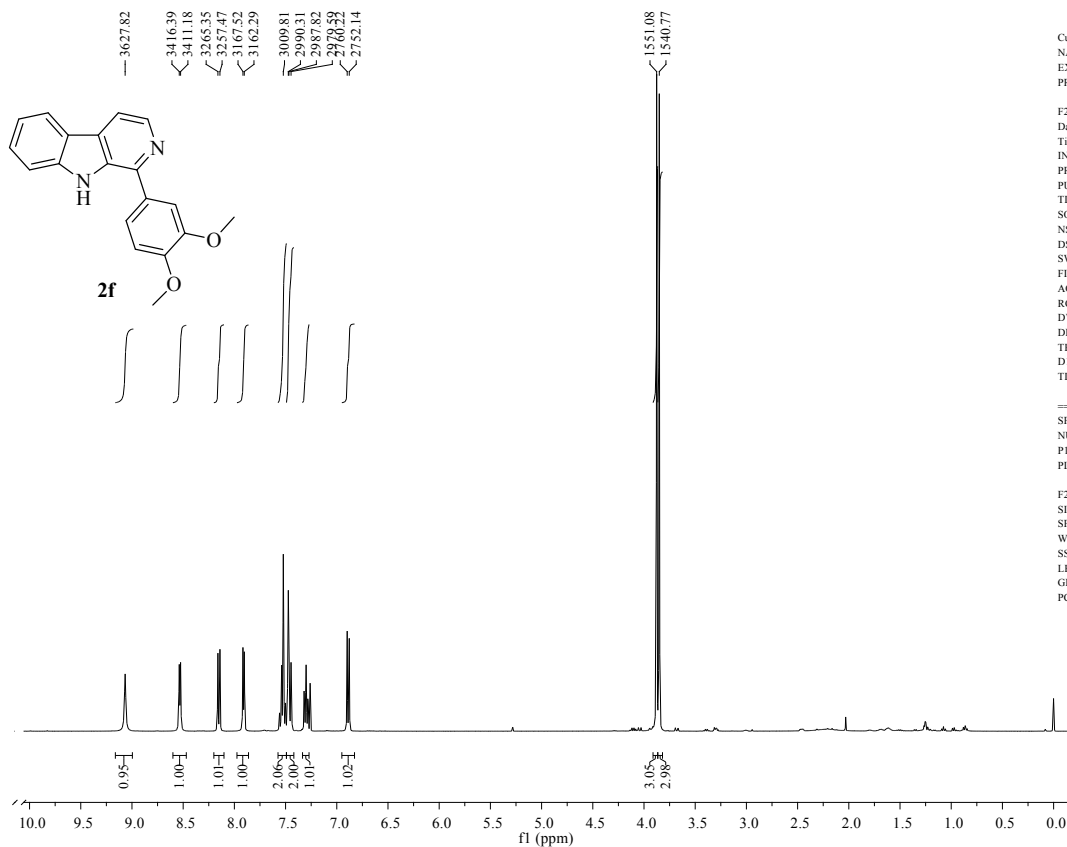

Current Data Parameters  
 NAME 130419-SXX-ZJH-136  
 EXPNO 1  
 PROCNO 1

F2 - Acquisition Parameters  
 Date\_ 20130419  
 Time 11.17  
 INSTRUM spect  
 PROBHD 5 mm PABBO BB/  
 PULPROG zg30  
 TD 65536  
 SOLVENT CDCl3  
 NS 8  
 DS 2  
 SWH 8012.820 Hz  
 FIDRES 0.122266 Hz  
 AQ 4.0894465 sec  
 RG 64  
 DW 62.400 usec  
 DE 6.50 usec  
 TE 296.0 K  
 D1 1.0000000 sec  
 TD0 1

==== CHANNEL f1 =====  
 SFO1 400.1324710 MHz  
 NUC1 1H  
 P1 13.70 usec  
 PLW1 9.17000008 W

F2 - Processing parameters  
 SI 65536  
 SF 400.1300101 MHz  
 WDW EM  
 SSB 0  
 LB 0.30 Hz  
 GB 0  
 PC 1.00

<sup>13</sup>C NMR (DMSO-*d*<sub>6</sub>, 100 MHz) spectrum of compound **2f**:

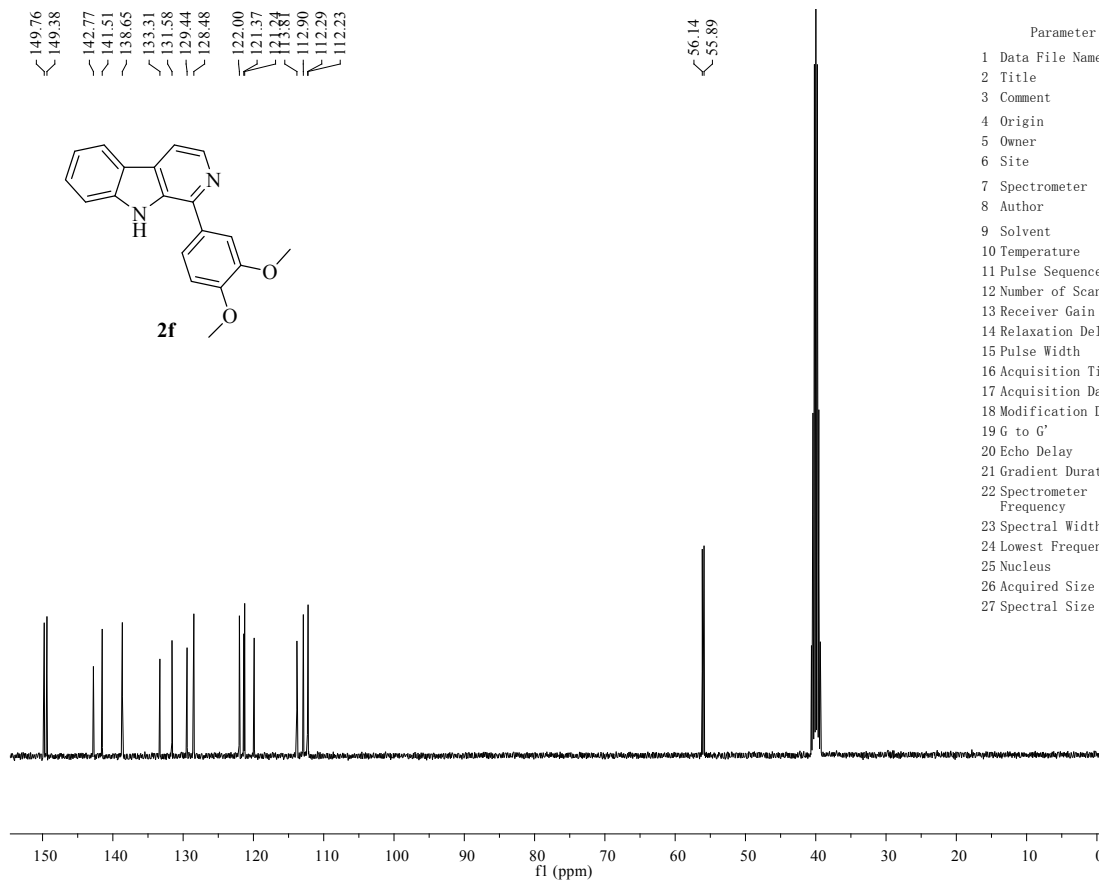

| Parameter            | Value               |
|----------------------|---------------------|
| 1 Data File Name     | SXX-ZJH-136         |
| 2 Title              | SXX-ZJH-136         |
| 3 Comment            |                     |
| 4 Origin             | Bruker BioSpin GmbH |
| 5 Owner              | nmr                 |
| 6 Site               |                     |
| 7 Spectrometer       | spect               |
| 8 Author             |                     |
| 9 Solvent            | DMSO                |
| 10 Temperature       | 298.9               |
| 11 Pulse Sequence    | zgpg30              |
| 12 Number of Scans   | 512                 |
| 13 Receiver Gain     | 322                 |
| 14 Relaxation Delay  | 2.0000              |
| 15 Pulse Width       | 9.4000              |
| 16 Acquisition Time  | 1.3631              |
| 17 Acquisition Date  | 2013-04-26T17:01:19 |
| 18 Modification Date | 2013-04-26T17:01:00 |
| 19 G to G'           | 1.00000000          |
| 20 Echo Delay        | 0.0000              |
| 21 Gradient Duration | 0.0000              |
| 22 Spectrometer      | 100.61              |
| Frequency            |                     |
| 23 Spectral Width    | 24038.5             |
| 24 Lowest Frequency  | -1958.4             |
| 25 Nucleus           | 13C                 |
| 26 Acquired Size     | 32768               |
| 27 Spectral Size     | 65536               |



<sup>1</sup>H NMR (DMSO-*d*<sub>6</sub>, 400 MHz) spectrum of compound **2g**:

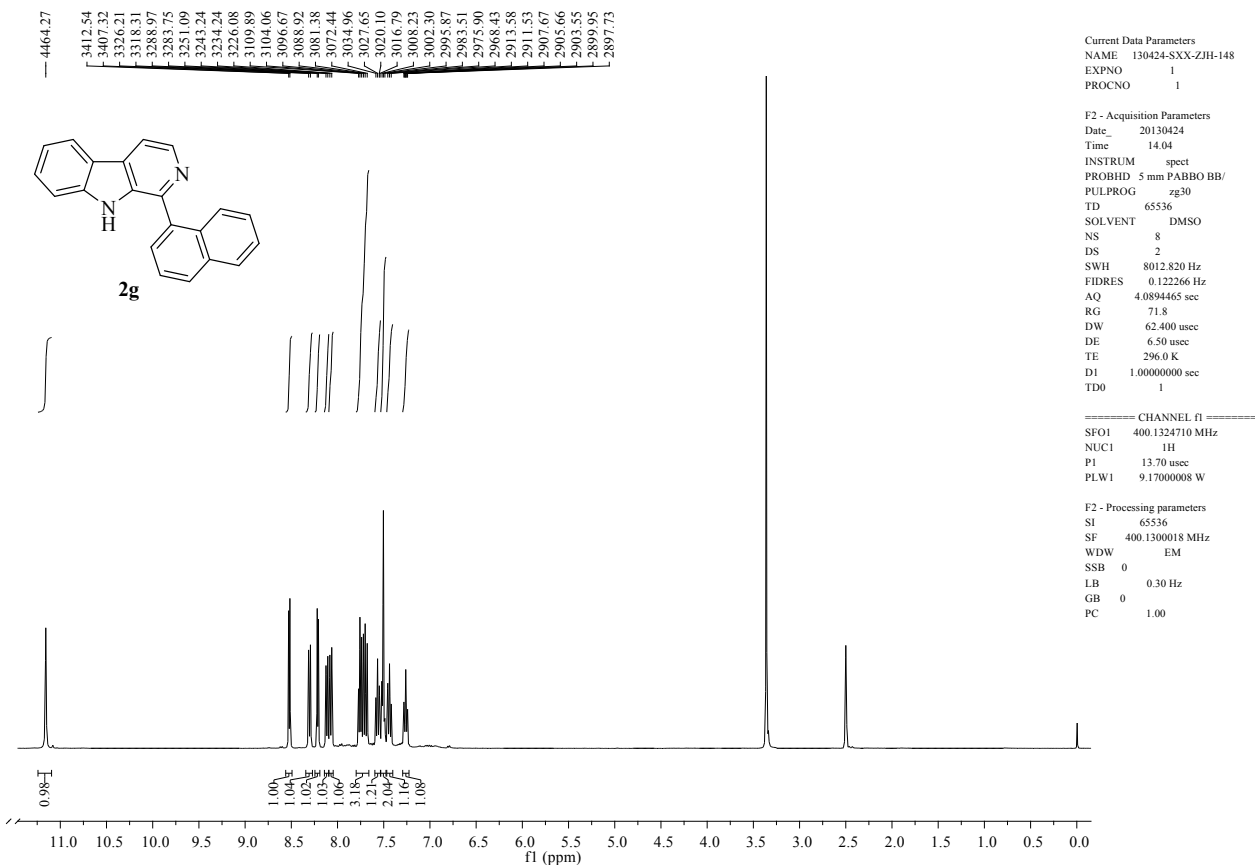

<sup>13</sup>C NMR (DMSO-*d*<sub>6</sub>, 100 MHz) spectrum of compound **2g**:

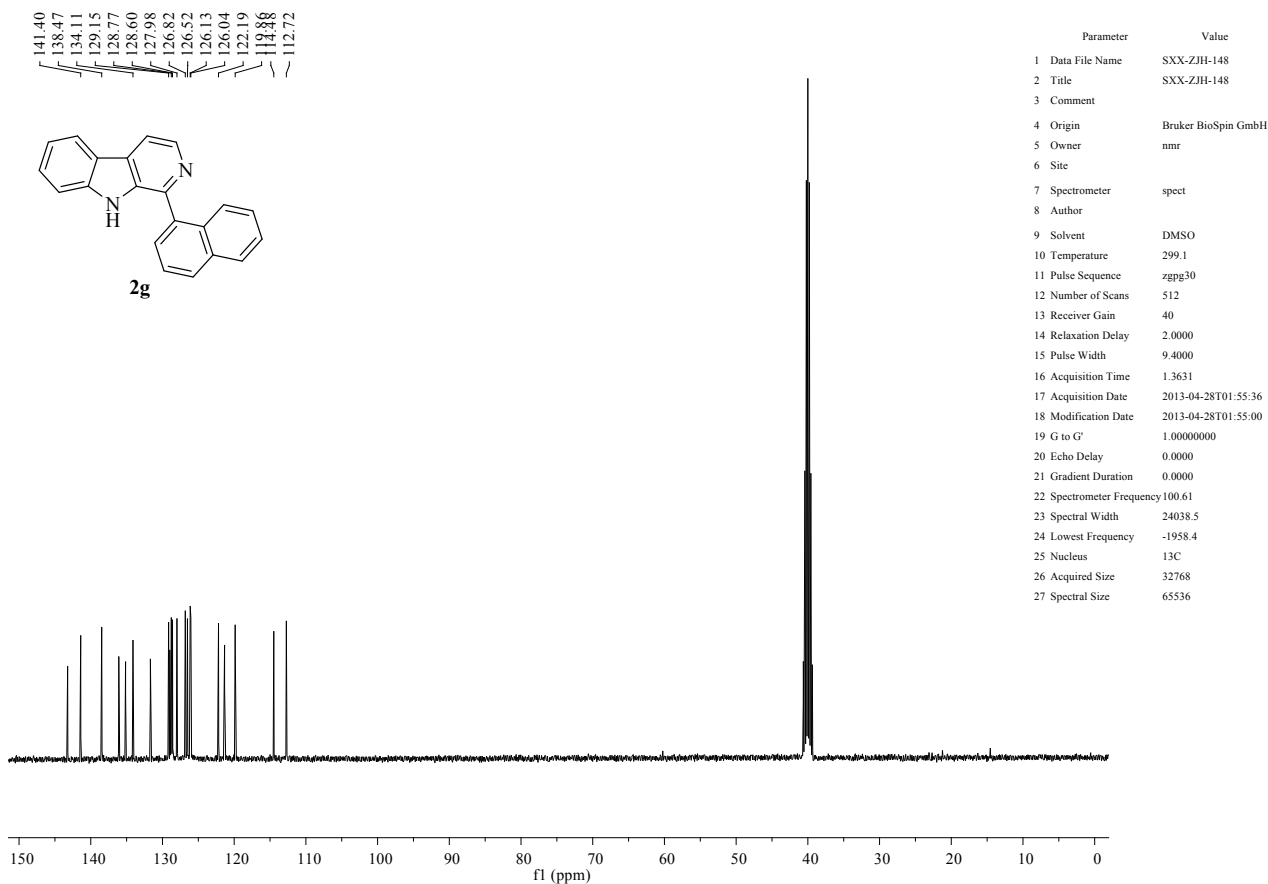

<sup>1</sup>H NMR (CDCl<sub>3</sub>, 400 MHz) spectrum of compound **2h**:

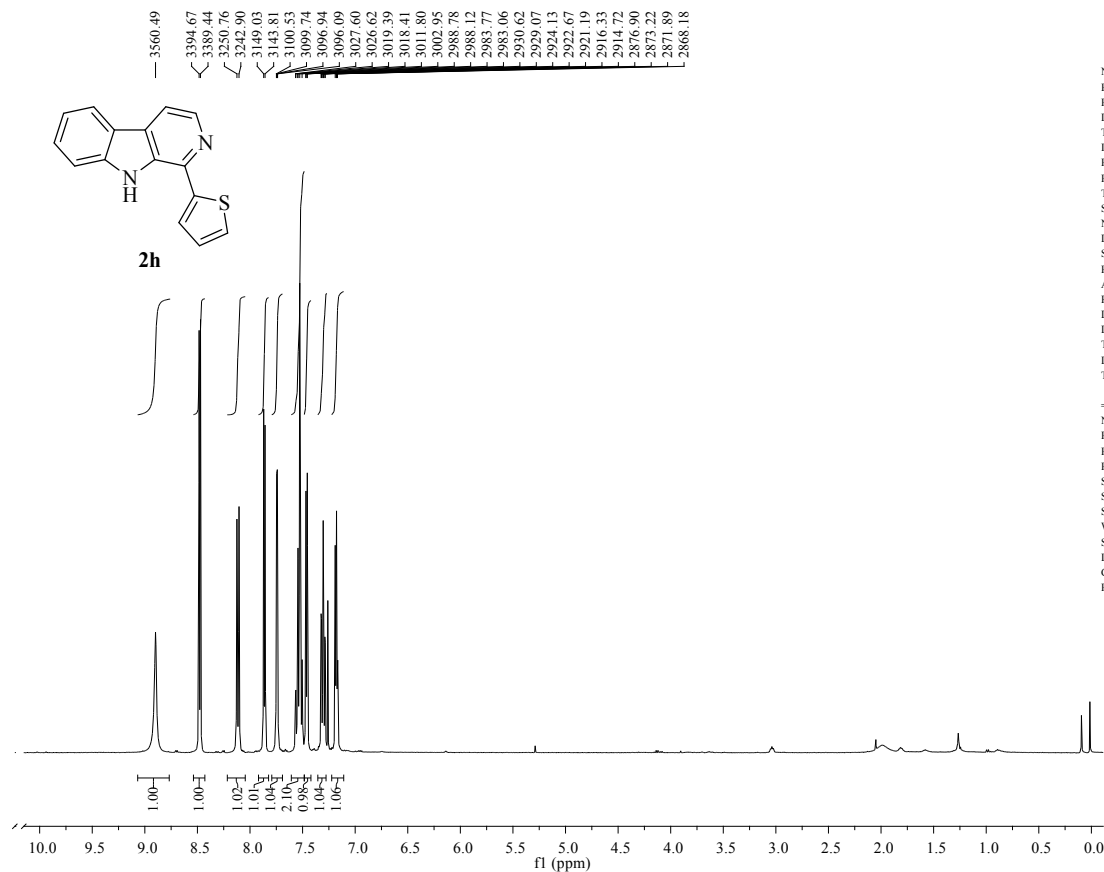

```

NAME SXX-ZJH-134
EXPNO 1
PROCNO 1
Date_ 20130419
Time 7.42
INSTRUM spect
PROBHD 5 mm PABBO BB-
PULPROG zg30
TD 65536
SOLVENT CDCl3
NS 16
DS 2
SWH 8223.685 Hz
FIDRES 0.125483 Hz
AQ 3.9846387 sec
RG 287
DW 60.800 usec
DE 6.50 usec
TE 298.3 K
D1 1.00000000 sec
TDO 1
    
```

```

===== CHANNEL f1 =====
NUC1 1H
PI 13.30 usec
PL1 -2.00 dB
PL1W 15.28731537 W
SFO1 400.1324710 MHz
SI 32768
SF 400.1300151 MHz
WDW EM
SSB 0
LB 0.30 Hz
GB 0
PC 1.00
    
```

<sup>13</sup>C NMR (CDCl<sub>3</sub>, 100 MHz) spectrum of compound **2h**:

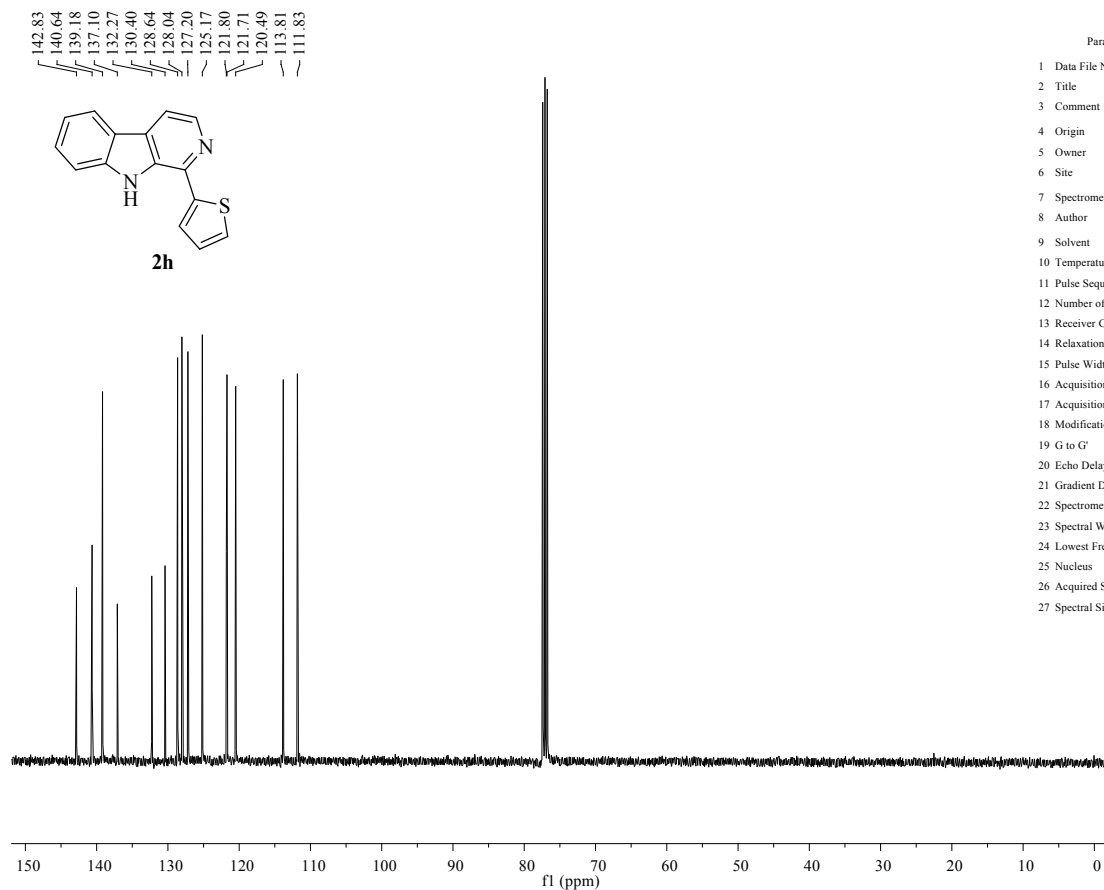

| Parameter                 | Value               |
|---------------------------|---------------------|
| 1 Data File Name          | SXX-ZJH-134         |
| 2 Title                   | SXX-ZJH-134         |
| 3 Comment                 |                     |
| 4 Origin                  | Bruker BioSpin GmbH |
| 5 Owner                   | nmr                 |
| 6 Site                    |                     |
| 7 Spectrometer            | spect               |
| 8 Author                  |                     |
| 9 Solvent                 | CDCl3               |
| 10 Temperature            | 296.5               |
| 11 Pulse Sequence         | zgpg30              |
| 12 Number of Scans        | 500                 |
| 13 Receiver Gain          | 362                 |
| 14 Relaxation Delay       | 2.0000              |
| 15 Pulse Width            | 9.4000              |
| 16 Acquisition Time       | 1.3631              |
| 17 Acquisition Date       | 2013-04-23T08:58:57 |
| 18 Modification Date      | 2013-04-23T08:59:00 |
| 19 G to G'                | 1.00000000          |
| 20 Echo Delay             | 0.0000              |
| 21 Gradient Duration      | 0.0000              |
| 22 Spectrometer Frequency | 100.62              |
| 23 Spectral Width         | 24038.5             |
| 24 Lowest Frequency       | -1958.4             |
| 25 Nucleus                | 13C                 |
| 26 Acquired Size          | 32768               |
| 27 Spectral Size          | 65536               |

<sup>1</sup>H NMR (CDCl<sub>3</sub>, 400 MHz) spectrum of compound **2i**:

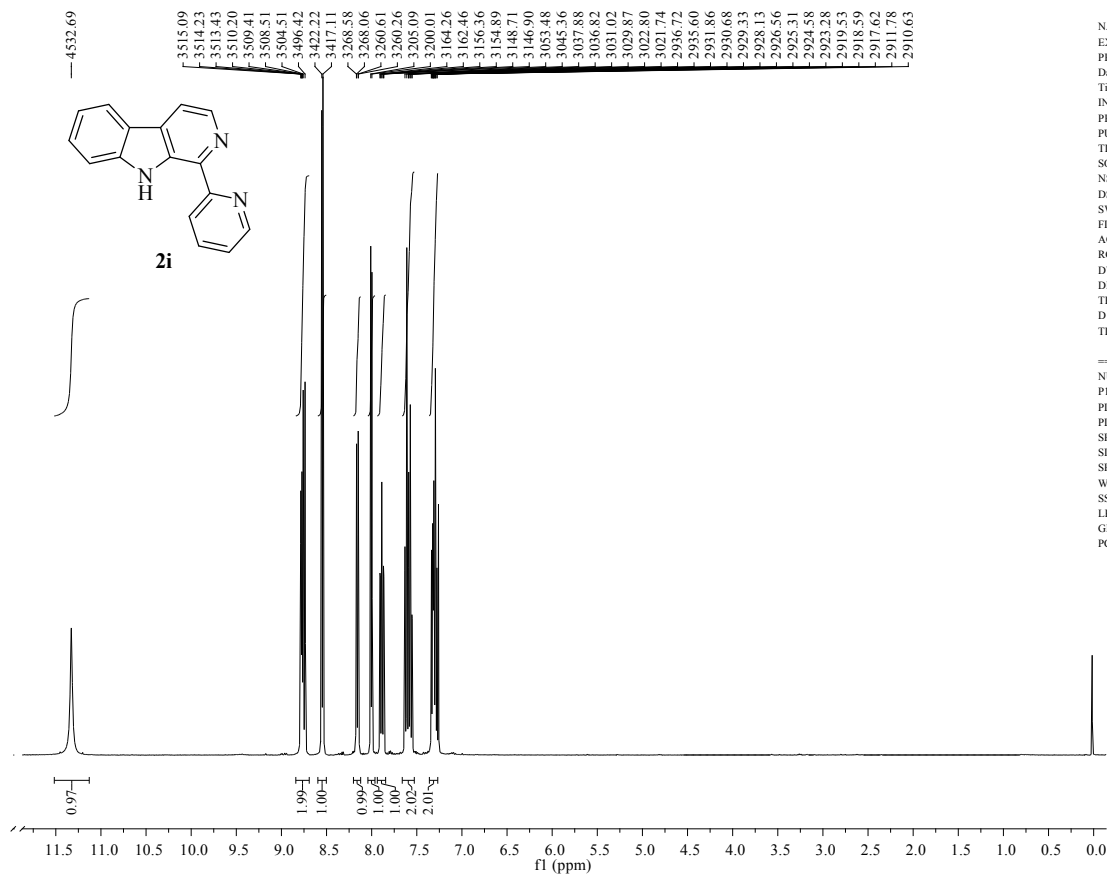

NAME SXX-ZJH-133  
EXPNO 1  
PROCNO 1  
Date\_ 20130419  
Time 7.37  
INSTRUM spect  
PROBHD 5 mm PABBO BB-  
PULPROG zg30  
TD 65536  
SOLVENT CDCl3  
NS 16  
DS 2  
SWH 8223.685 Hz  
FIDRES 0.125483 Hz  
AQ 3.9846387 sec  
RG 287  
DW 60.800 usec  
DE 6.50 usec  
TE 298.3 K  
D1 1.00000000 sec  
TD0 1

===== CHANNEL f1 =====  
NUC1 1H  
P1 13.30 usec  
PL1 -2.00 dB  
PL1W 15.28731537 W  
SFO1 400.1324710 MHz  
SI 32768  
SF 400.1300161 MHz  
WDW EM  
SSB 0  
LB 0.30 Hz  
GB 0  
PC 1.00

<sup>13</sup>C NMR (CDCl<sub>3</sub>, 100 MHz) spectrum of compound **2i**:

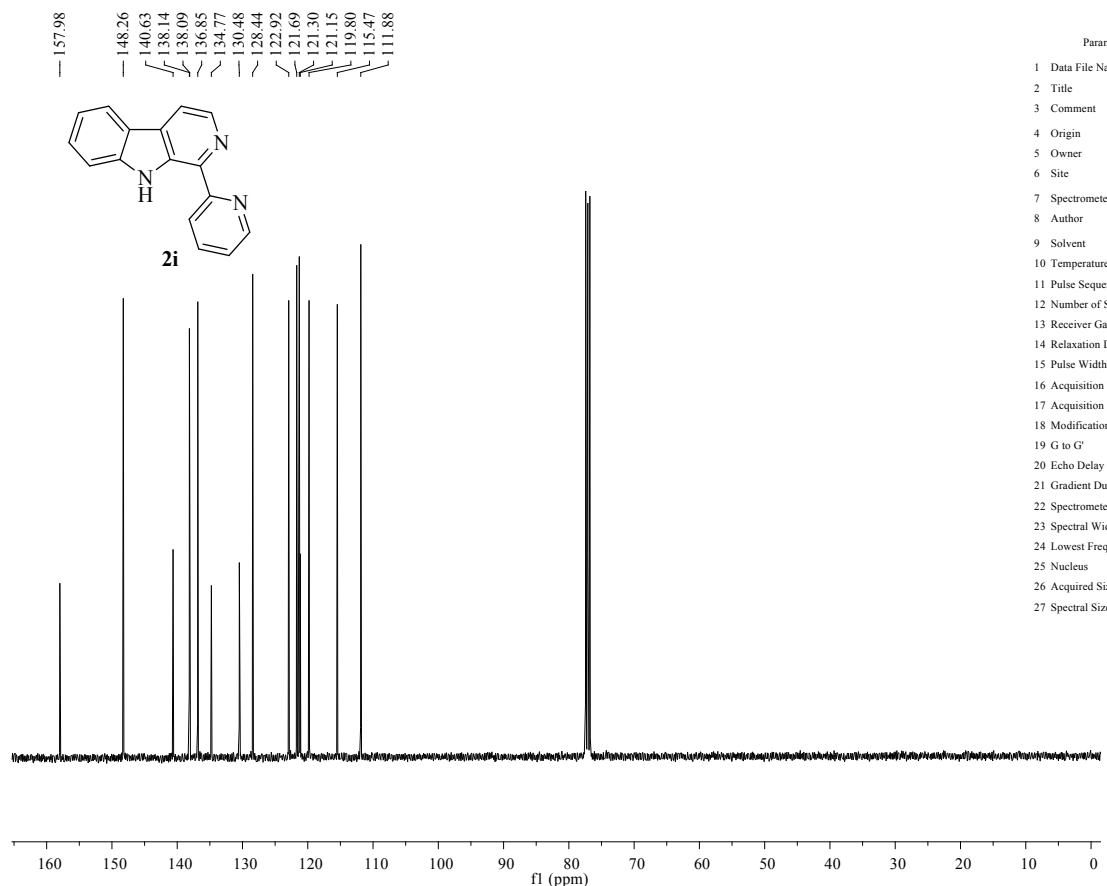

| Parameter                 | Value               |
|---------------------------|---------------------|
| 1 Data File Name          | SXX-ZJH-133         |
| 2 Title                   | SXX-ZJH-133 (C)     |
| 3 Comment                 |                     |
| 4 Origin                  | Bruker BioSpin GmbH |
| 5 Owner                   | mnr                 |
| 6 Site                    |                     |
| 7 Spectrometer            | spect               |
| 8 Author                  |                     |
| 9 Solvent                 | CDCl3               |
| 10 Temperature            | 296.5               |
| 11 Pulse Sequence         | zgpg30              |
| 12 Number of Scans        | 512                 |
| 13 Receiver Gain          | 322                 |
| 14 Relaxation Delay       | 2.0000              |
| 15 Pulse Width            | 9.4000              |
| 16 Acquisition Time       | 1.3631              |
| 17 Acquisition Date       | 2013-04-23T08:26:20 |
| 18 Modification Date      | 2013-04-23T08:26:00 |
| 19 G to G'                | 1.00000000          |
| 20 Echo Delay             | 0.0000              |
| 21 Gradient Duration      | 0.0000              |
| 22 Spectrometer Frequency | 100.61              |
| 23 Spectral Width         | 24038.5             |
| 24 Lowest Frequency       | -1958.4             |
| 25 Nucleus                | 13C                 |
| 26 Acquired Size          | 32768               |
| 27 Spectral Size          | 32768               |

<sup>1</sup>H NMR (CDCl<sub>3</sub>, 400 MHz) spectrum of compound **2j**:

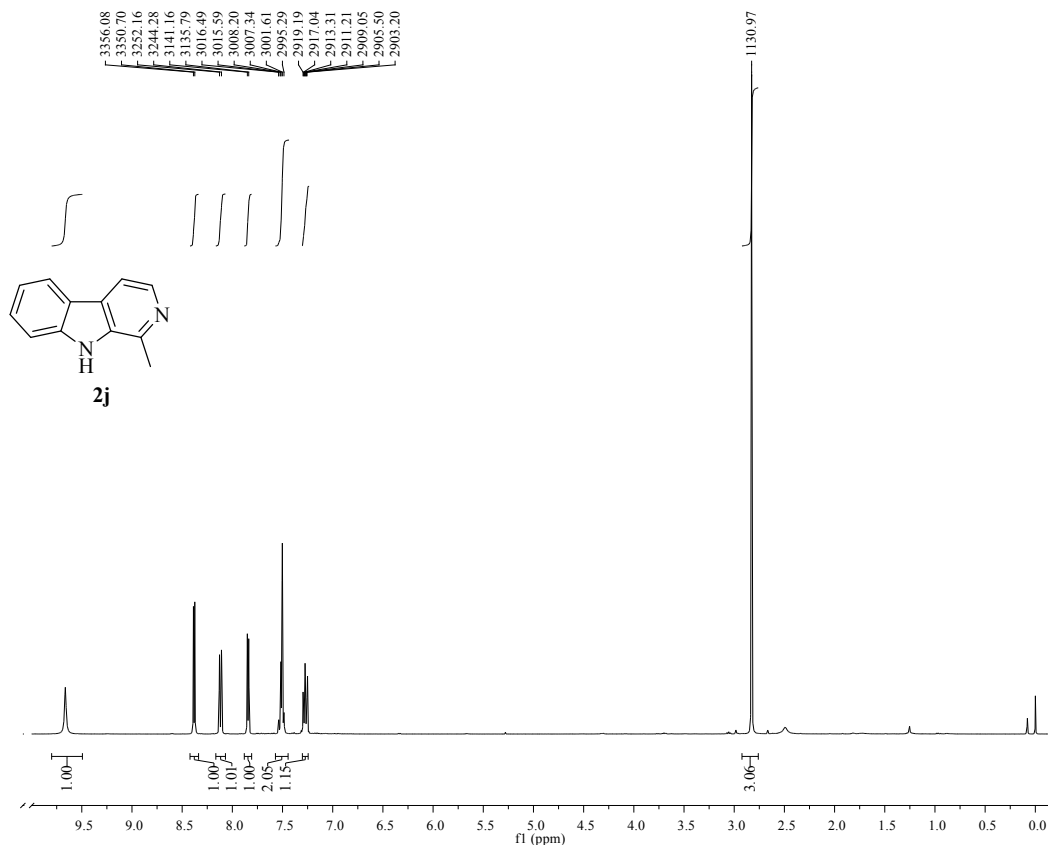

```

NAME      sxx-zjh-21
EXPNO     10
PROCNO    1
Date_     20120509
Time      16.50
INSTRUM   spect
PROBHD    5 mm PABBO BB-
PULPROG   zg30
TD         65536
SOLVENT   CDCl3
NS         16
DS         0
SWH       8223.685 Hz
FIDRES    0.125483 Hz
AQ         3.9846387 sec
RG         128
DW         60.800 usec
DE         6.50 usec
TE         295.0 K
D1         1.00000000 sec
TD0        1
    
```

```

===== CHANNEL f1 =====
NUC1      1H
P1         14.90 usec
PL1        -1.00 dB
PL1W      13.37643433 W
SFO1      400.1324710 MHz
SI         32768
SF         400.1300135 MHz
WDW        EM
SSB         0
LB         0.30 Hz
GB         0
PC         1.00
    
```

<sup>13</sup>C NMR (CDCl<sub>3</sub>, 100 MHz) spectrum of compound **2j**:

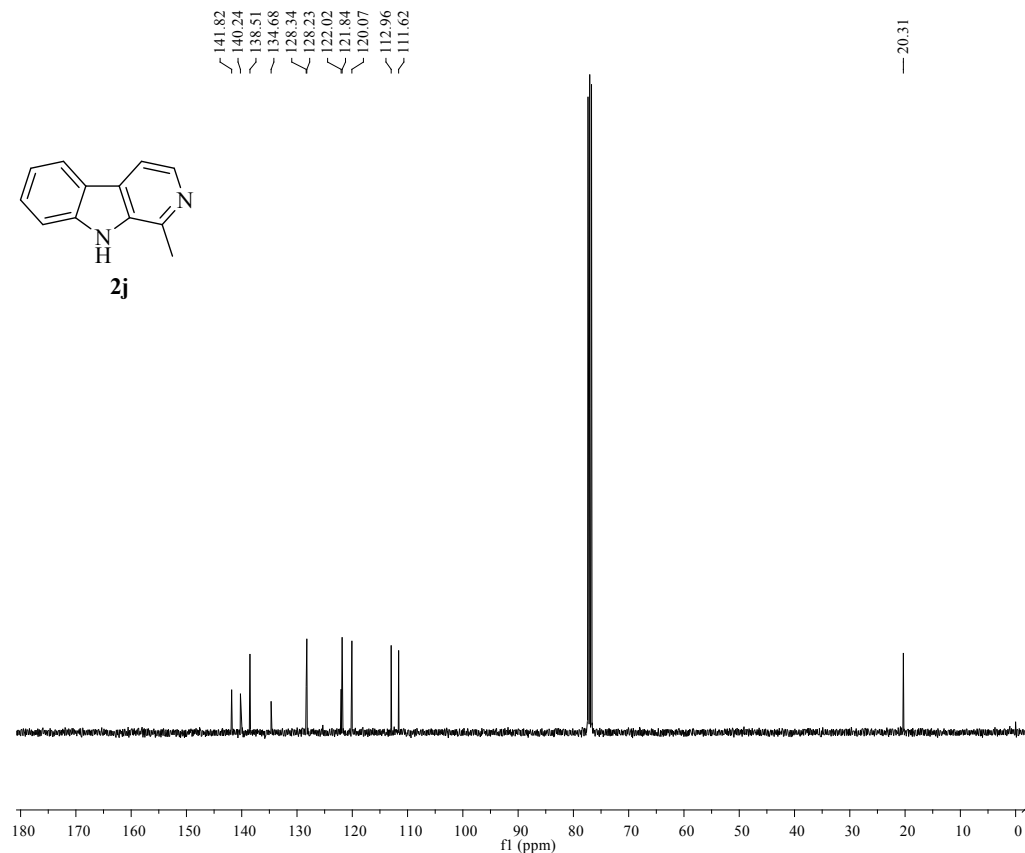

```

NAME      sxx-zjh-21
EXPNO     10
PROCNO    1
Date_     20120520
Time      8.11
INSTRUM   spect
PROBHD    5 mm PABBO BB-
PULPROG   zgpg30
TD         65536
SOLVENT   CDCl3
NS         400
DS         0
SWH       24038.461 Hz
FIDRES    0.366798 Hz
AQ         1.3631988 sec
RG         203
DW         20.800 usec
DE         6.50 usec
TE         295.0 K
D1         2.00000000 sec
D11        0.03000000 sec
TD0        1
    
```

```

===== CHANNEL f1 =====
NUC1      13C
P1         9.00 usec
PL1        -2.00 dB
PL1W      57.32743073 W
SFO1      100.6228298 MHz

===== CHANNEL f2 =====
CPDPRG2   waltz16
NUC2      1H
PCPD2     90.00 usec
PL2        -1.00 dB
PL12       14.90 dB
PL13       17.90 dB
PL2W      13.37643433 W
PL12W     0.34382734 W
PL13W     0.17232187 W
SFO2      400.1316005 MHz
SI         32768
SF         100.6127690 MHz
WDW        EM
SSB         0
LB         1.00 Hz
GB         0
PC         1.00
    
```

<sup>1</sup>H NMR (DMSO-*d*<sub>6</sub>, 400 MHz) spectrum of compound **2k**:

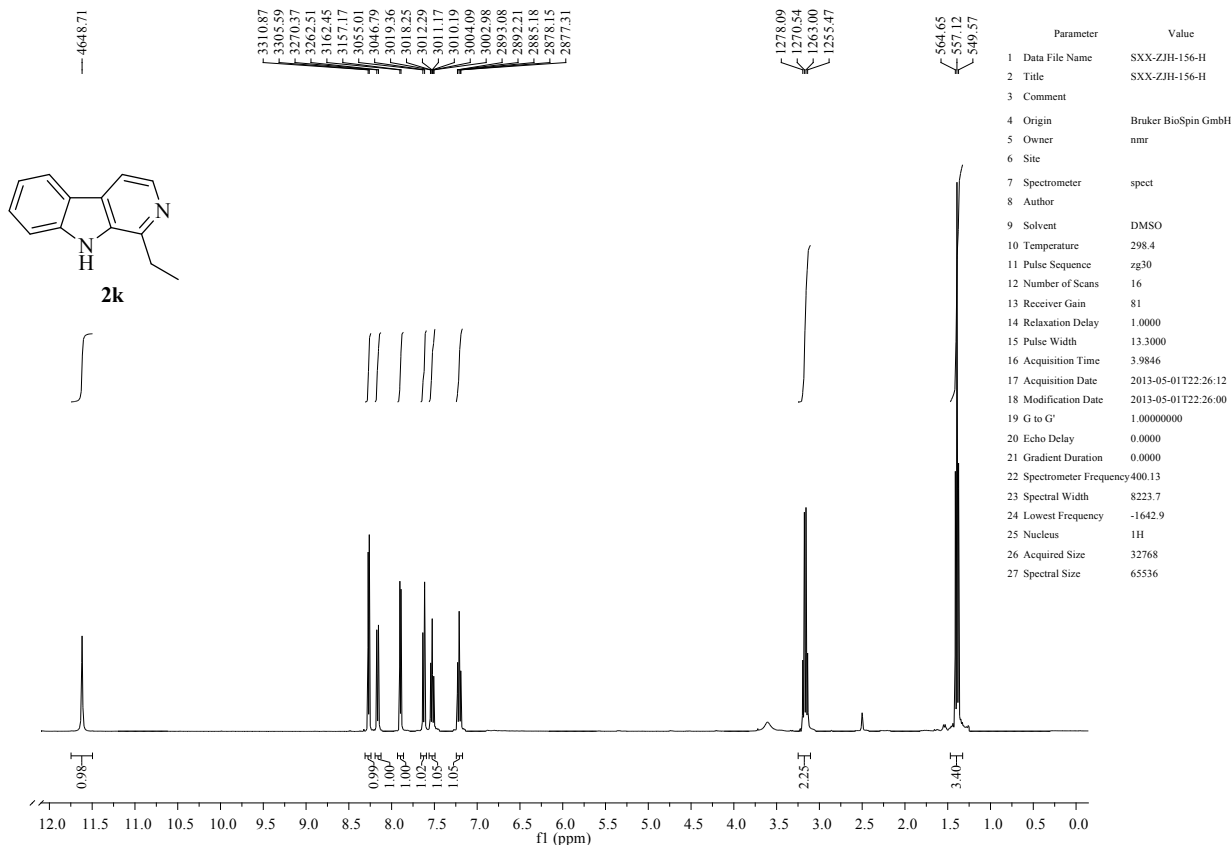

<sup>13</sup>C NMR (DMSO-*d*<sub>6</sub>, 100 MHz) spectrum of compound **2k**:

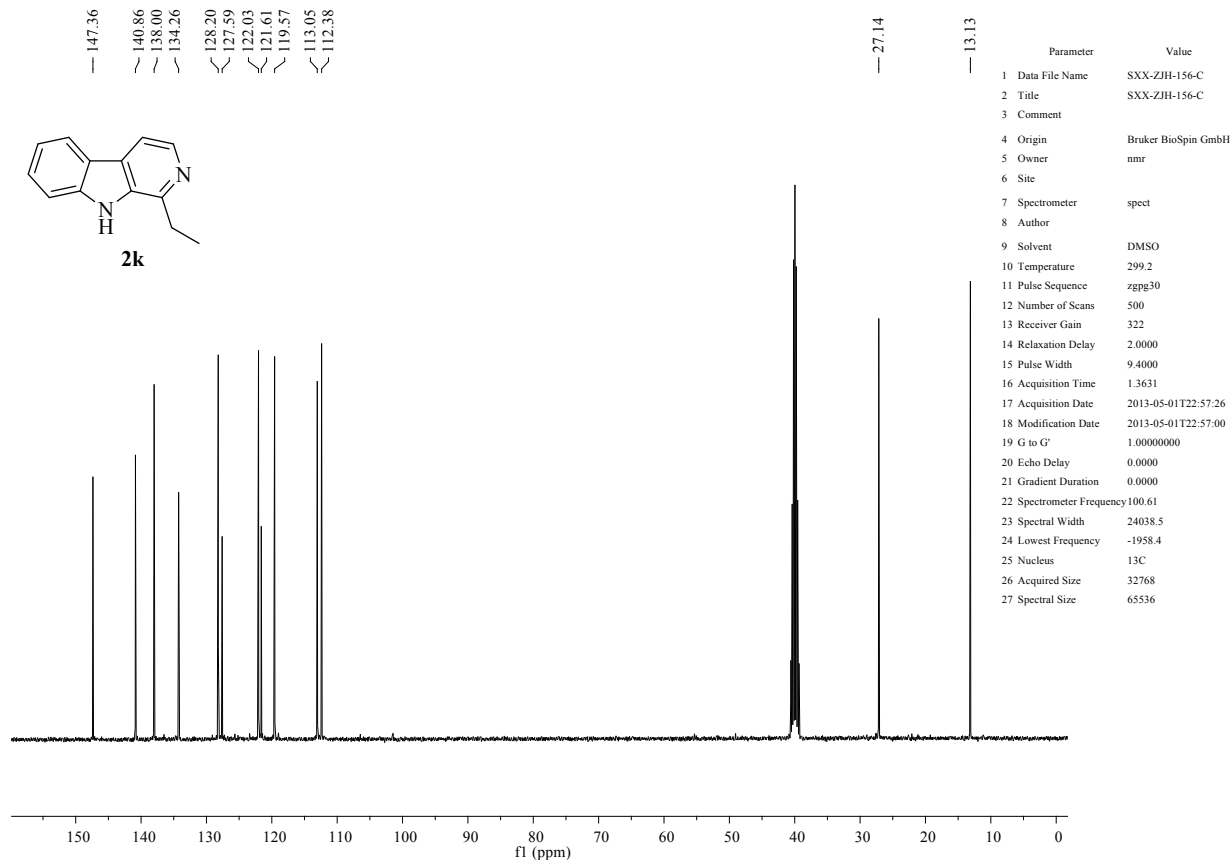

<sup>1</sup>H NMR (CDCl<sub>3</sub>, 400 MHz) spectrum of compound **21**:

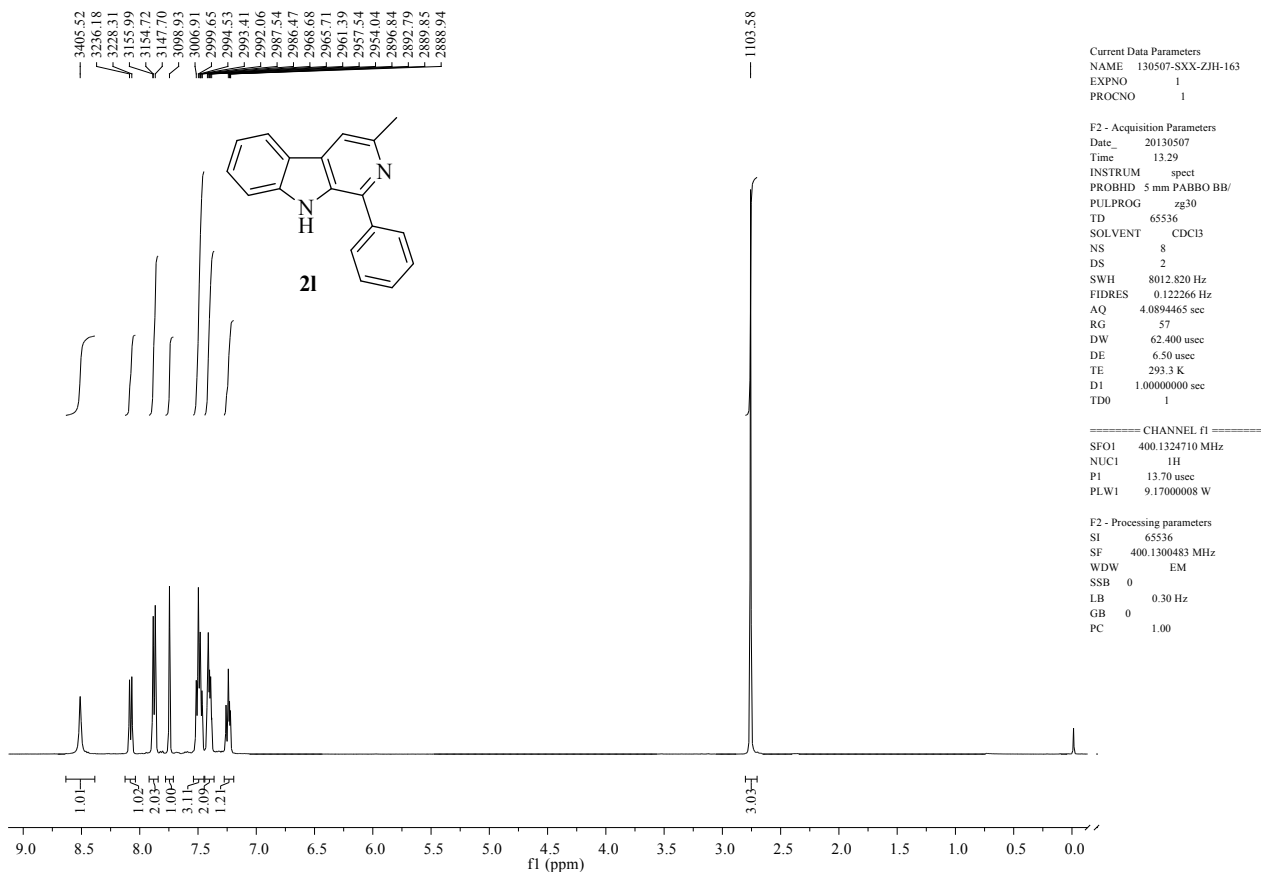

<sup>13</sup>C NMR (CDCl<sub>3</sub>, 100 MHz) spectrum of compound **21**:

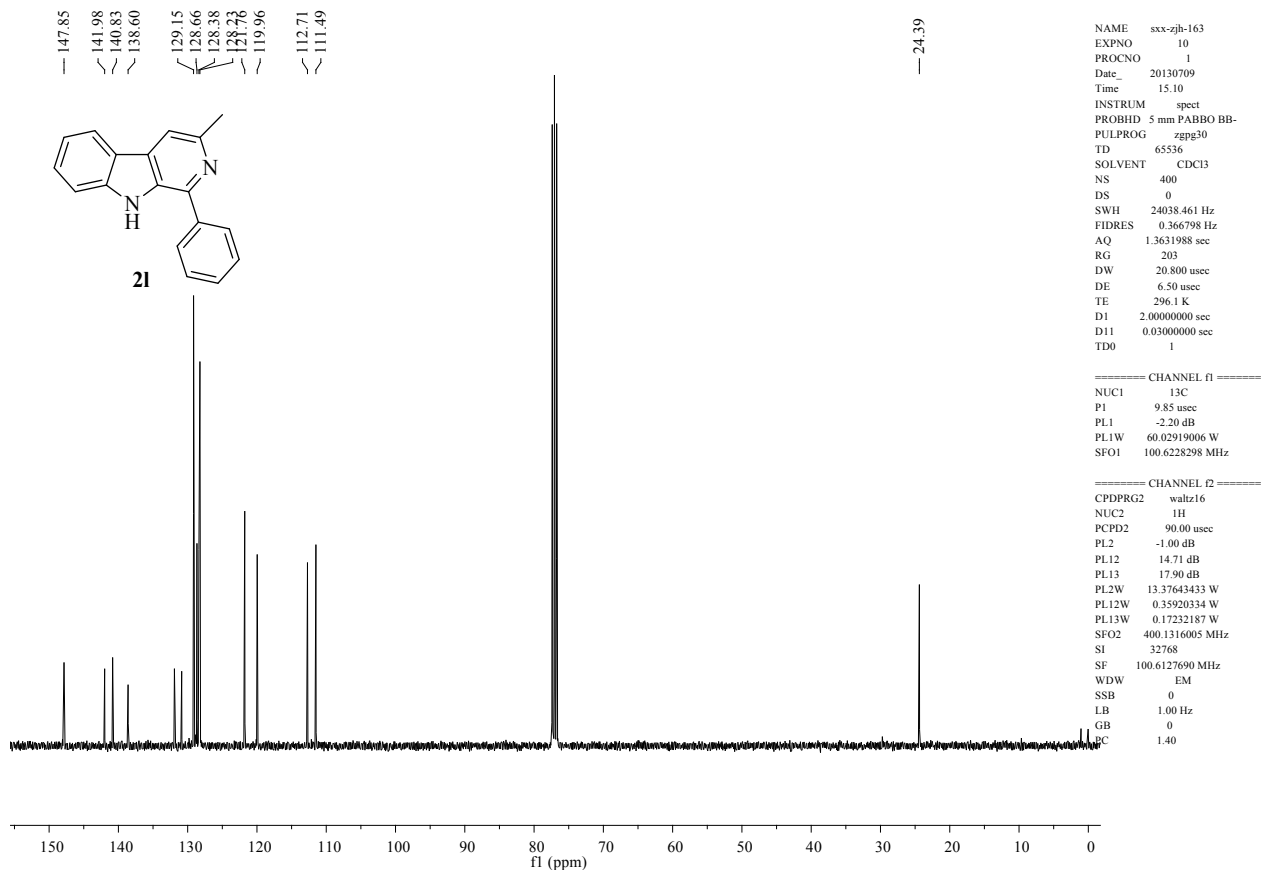

<sup>1</sup>H NMR (CDCl<sub>3</sub>, 400 MHz) spectrum of compound **2m**:

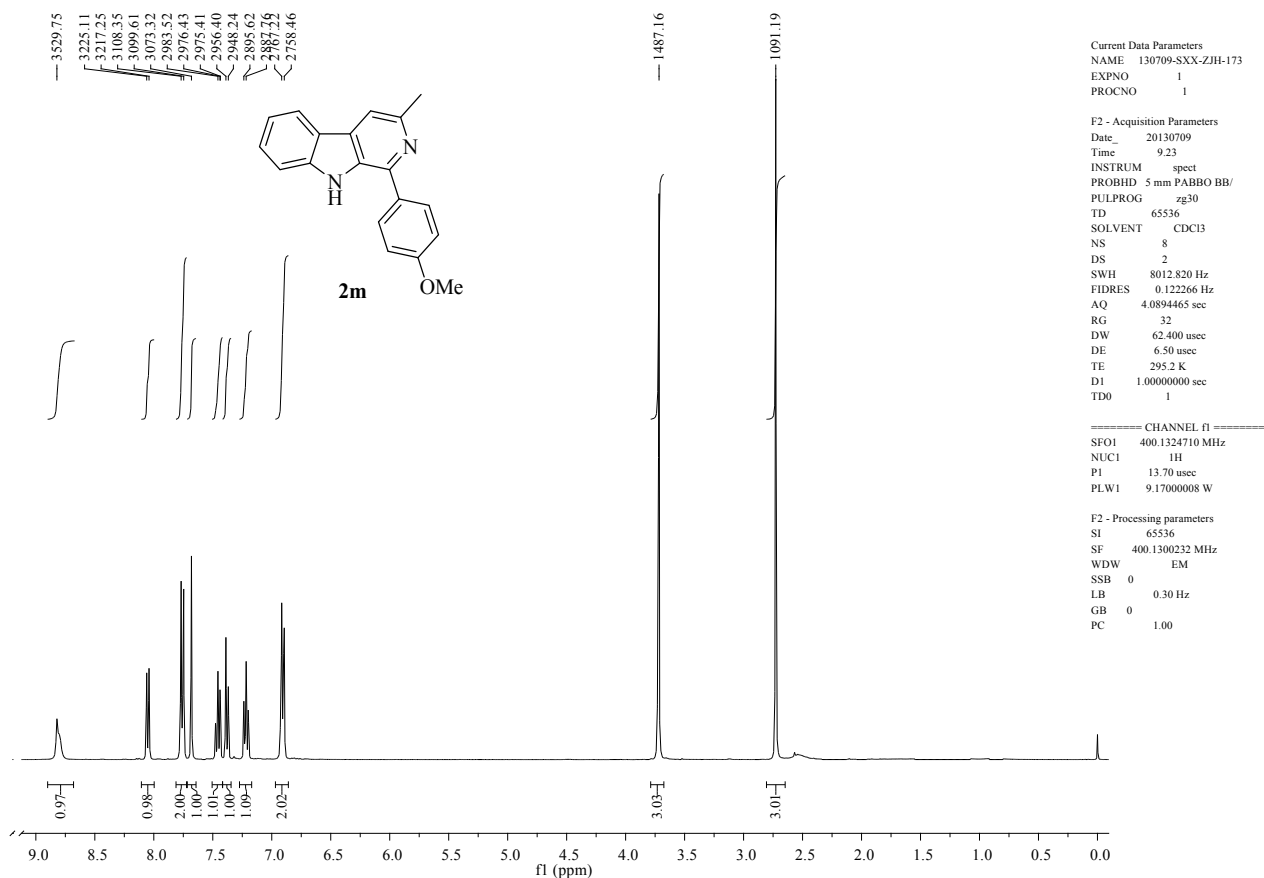

<sup>13</sup>C NMR (CDCl<sub>3</sub>, 100 MHz) spectrum of compound **2m**:

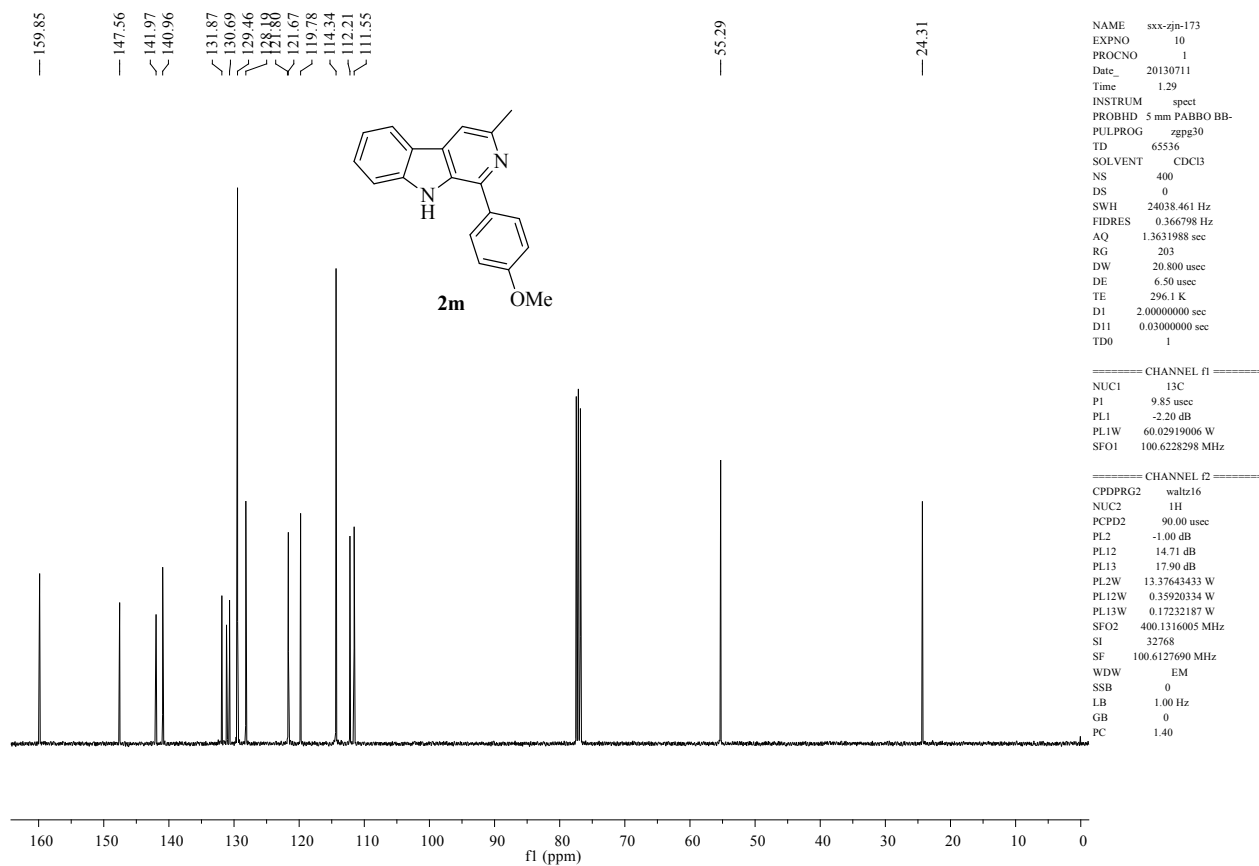

<sup>1</sup>H NMR (CDCl<sub>3</sub>, 400 MHz) spectrum of compound **2n**:

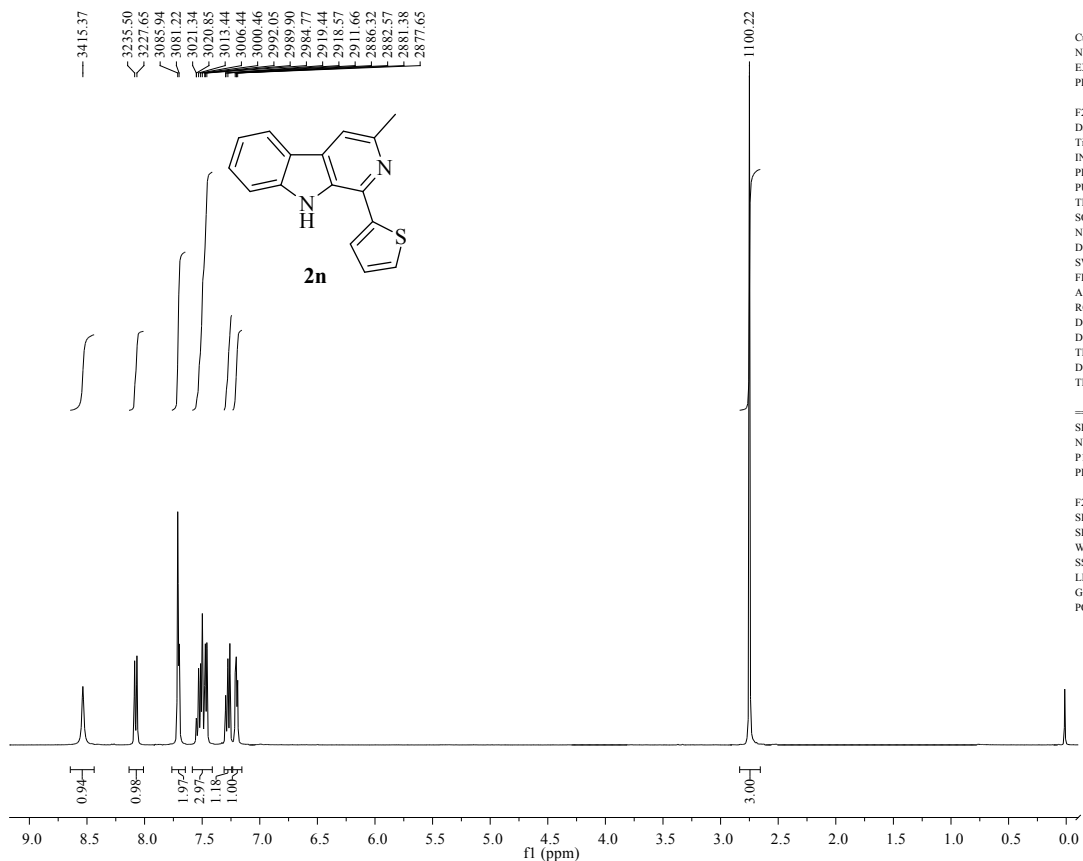

Current Data Parameters  
 NAME 130709-SXX-ZH-172  
 EXPNO 1  
 PROCNO 1

F2 - Acquisition Parameters  
 Date\_ 20130709  
 Time 9.19  
 INSTRUM spect  
 PROBHD 5 mm PABBO BB/  
 PULPROG zg30  
 TD 65536  
 SOLVENT CDCl3  
 NS 8  
 DS 2  
 SWH 8012.820 Hz  
 FIDRES 0.122266 Hz  
 AQ 4.0894465 sec  
 RG 71.8  
 DW 62.400 usec  
 DE 6.50 usec  
 TE 295.1 K  
 D1 1.00000000 sec  
 TDO 1

==== CHANNEL f1 =====  
 SFO1 400.1324710 MHz  
 NUC1 1H  
 P1 13.70 usec  
 PLW1 9.17000008 W

F2 - Processing parameters  
 SI 65536  
 SF 400.1300152 MHz  
 WDW EM  
 SSB 0  
 LB 0.30 Hz  
 GB 0  
 PC 1.00

<sup>13</sup>C NMR (CDCl<sub>3</sub>, 100 MHz) spectrum of compound **2n**:

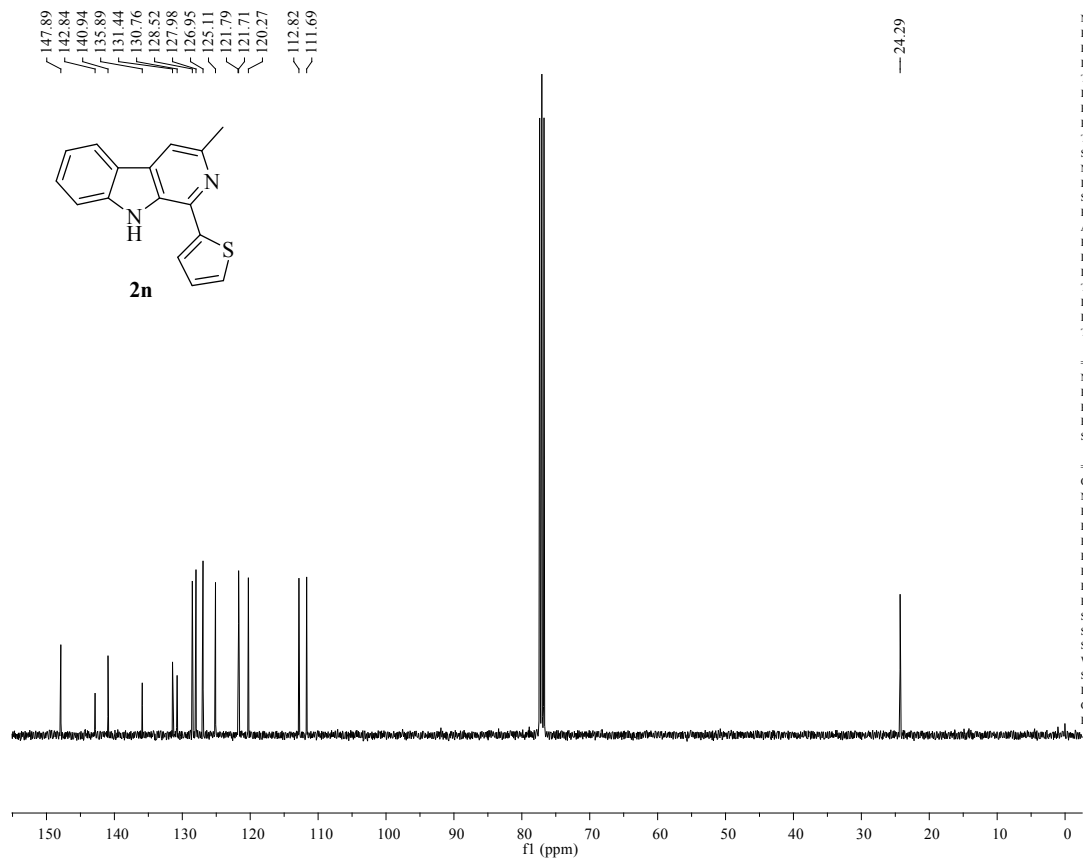

NAME sxx-zjn-172  
 EXPNO 10  
 PROCNO 1  
 Date\_ 20130711  
 Time 1.01  
 INSTRUM spect  
 PROBHD 5 mm PABBO BB-  
 PULPROG zgpg30  
 TD 65536  
 SOLVENT CDCl3  
 NS 400  
 DS 0  
 SWH 24038.461 Hz  
 FIDRES 0.366798 Hz  
 AQ 1.3631988 sec  
 RG 203  
 DW 20.800 usec  
 DE 6.50 usec  
 TE 296.3 K  
 D1 2.00000000 sec  
 D11 0.03000000 sec  
 TDO 1

==== CHANNEL f1 =====  
 NUC1 13C  
 P1 9.85 usec  
 PL1 -2.20 dB  
 PL1W 60.02919006 W  
 SFO1 100.6228298 MHz

==== CHANNEL f2 =====  
 CPDPRG2 waltz16  
 NUC2 1H  
 PCPD2 90.00 usec  
 PL2 -1.00 dB  
 PL12 14.71 dB  
 PL13 17.90 dB  
 PL2W 13.37643433 W  
 PL12W 0.35920334 W  
 PL13W 0.17232187 W  
 SFO2 400.1316005 MHz  
 SI 32768  
 SF 100.6127690 MHz  
 WDW EM  
 SSB 0  
 LB 1.00 Hz  
 GB 0  
 PC 1.40



<sup>1</sup>H NMR (DMSO-*d*<sub>6</sub>, 400 MHz) spectrum of compound **2o**:

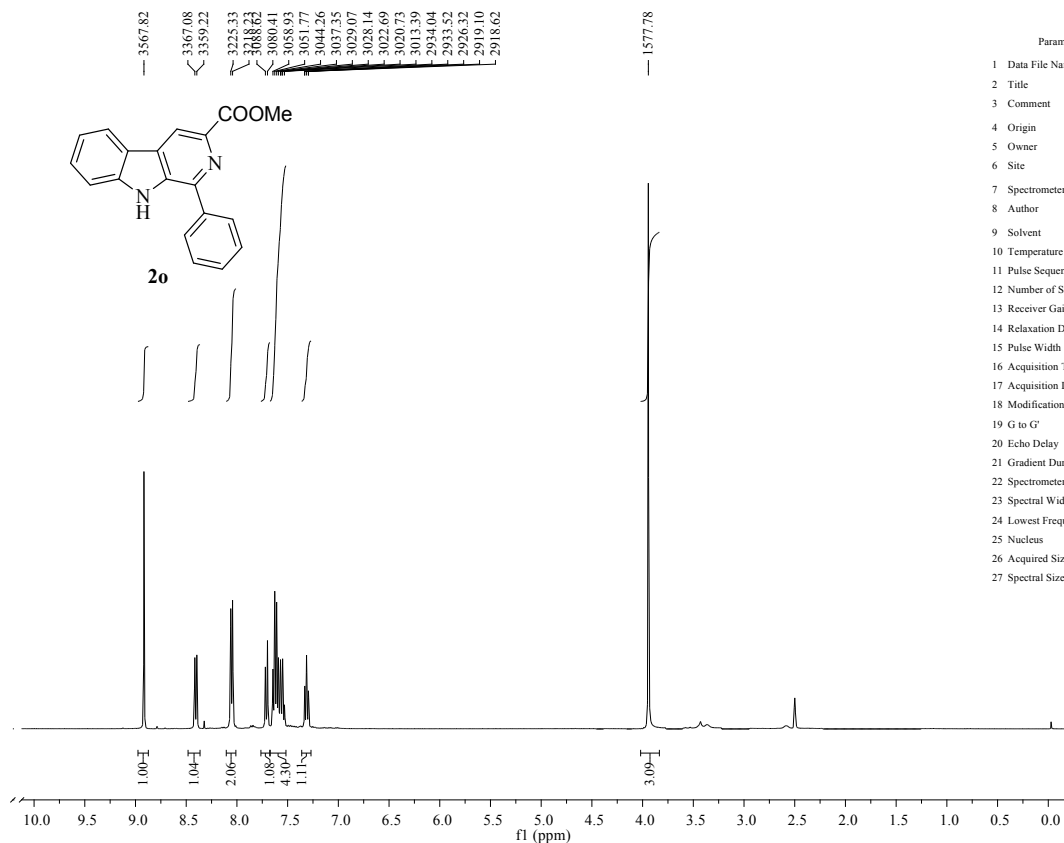

| Parameter                 | Value               |
|---------------------------|---------------------|
| 1 Data File Name          | SXX-ZJH-160-H       |
| 2 Title                   | SXX-ZJH-160-H       |
| 3 Comment                 |                     |
| 4 Origin                  | Bruker BioSpin GmbH |
| 5 Owner                   | nmr                 |
| 6 Site                    |                     |
| 7 Spectrometer            | spect               |
| 8 Author                  |                     |
| 9 Solvent                 | DMSO                |
| 10 Temperature            | 298.3               |
| 11 Pulse Sequence         | zg30                |
| 12 Number of Scans        | 16                  |
| 13 Receiver Gain          | 161                 |
| 14 Relaxation Delay       | 1.0000              |
| 15 Pulse Width            | 13.3000             |
| 16 Acquisition Time       | 3.9846              |
| 17 Acquisition Date       | 2013-05-02T00:12:54 |
| 18 Modification Date      | 2013-05-02T00:12:00 |
| 19 G to G'                | 1.00000000          |
| 20 Echo Delay             | 0.0000              |
| 21 Gradient Duration      | 0.0000              |
| 22 Spectrometer Frequency | 400.13              |
| 23 Spectral Width         | 8223.7              |
| 24 Lowest Frequency       | -1642.9             |
| 25 Nucleus                | <sup>1</sup> H      |
| 26 Acquired Size          | 32768               |
| 27 Spectral Size          | 65536               |

<sup>13</sup>C NMR (DMSO-*d*<sub>6</sub>, 100 MHz) spectrum of compound **2o**:

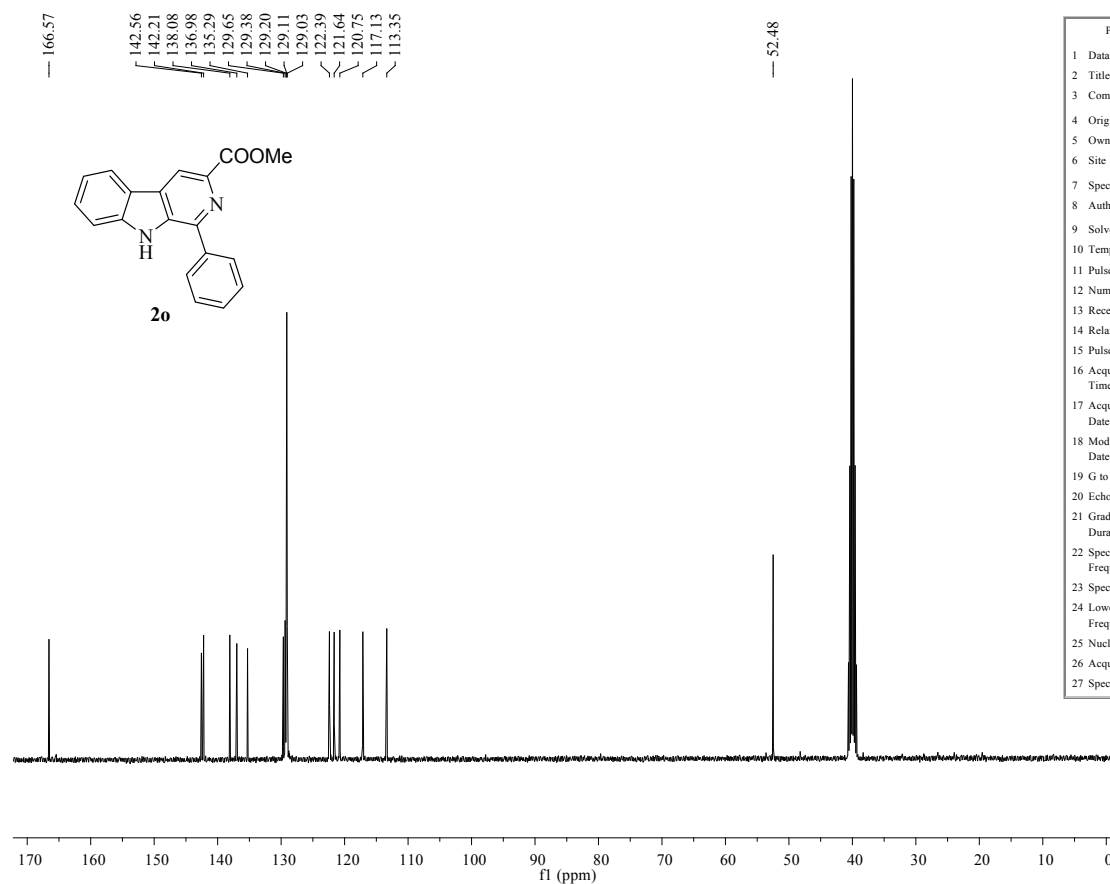

| Parameter                 | Value                |
|---------------------------|----------------------|
| 1 Data File Name          | SXX-ZJH-160-C/1/ fid |
| 2 Title                   | SXX-ZJH-160-C        |
| 3 Comment                 |                      |
| 4 Origin                  | Bruker BioSpin GmbH  |
| 5 Owner                   | nmr                  |
| 6 Site                    |                      |
| 7 Spectrometer            | spect                |
| 8 Author                  |                      |
| 9 Solvent                 | DMSO                 |
| 10 Temperature            | 299.1                |
| 11 Pulse Sequence         | zgpg30               |
| 12 Number of Scans        | 500                  |
| 13 Receiver Gain          | 362                  |
| 14 Relaxation Delay       | 2.0000               |
| 15 Pulse Width            | 9.4000               |
| 16 Acquisition Time       | 1.3631               |
| 17 Acquisition Date       | 2013-05-02T00:44:24  |
| 18 Modification Date      | 2013-05-02T00:44:00  |
| 19 G to G'                | 1.00000000           |
| 20 Echo Delay             | 0.0000               |
| 21 Gradient Duration      | 0.0000               |
| 22 Spectrometer Frequency | 100.61               |
| 23 Spectral Width         | 24038.5              |
| 24 Lowest Frequency       | -1958.4              |
| 25 Nucleus                | <sup>13</sup> C      |
| 26 Acquired Size          | 32768                |
| 27 Spectral Size          | 65536                |

<sup>1</sup>H NMR (DMSO-d<sub>6</sub>, 400 MHz) spectrum of compound **2p**:

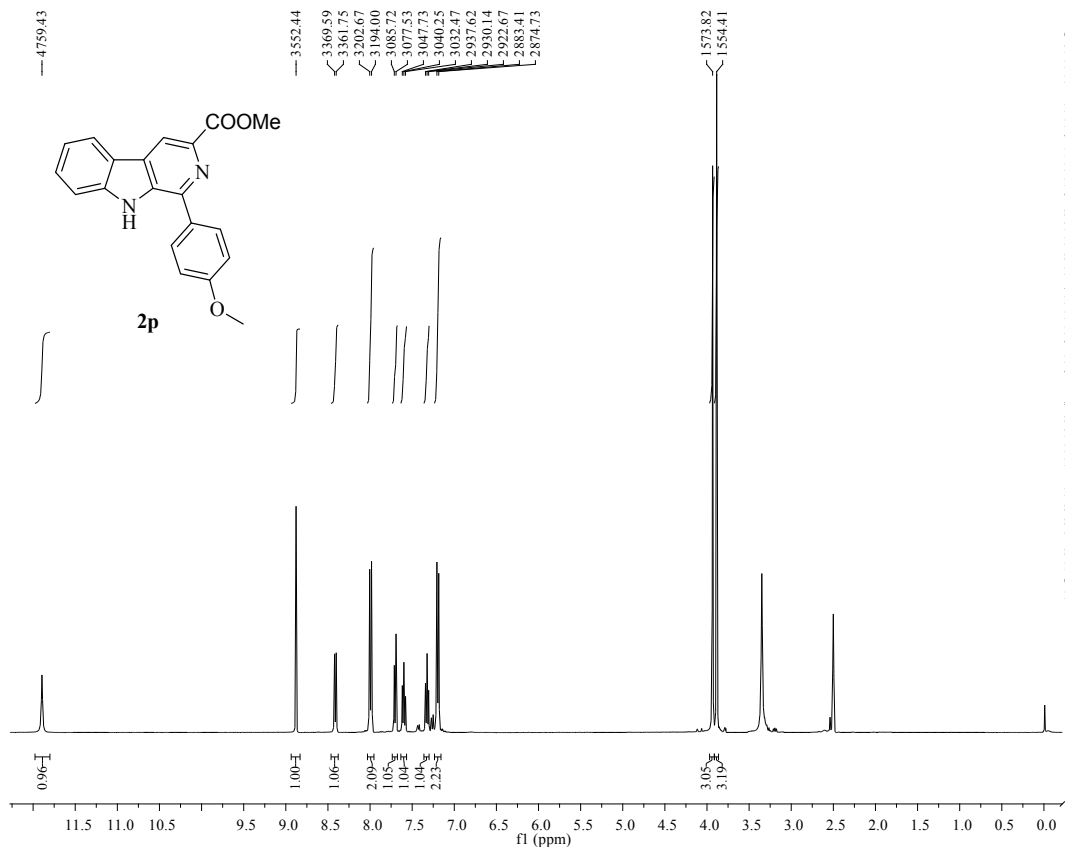

Current Data Parameters  
 NAME 130428-SXX-ZJH-161  
 EXPNO 1  
 PROCNO 1

F2 - Acquisition Parameters  
 Date\_ 20130428  
 Time 10.07  
 INSTRUM spect  
 PROBHD 5 mm PABBO BB/  
 PULPROG zg30  
 TD 65536  
 SOLVENT DMSO  
 NS 8  
 DS 2  
 SWH 8012.820 Hz  
 FIDRES 0.122266 Hz  
 AQ 4.0894465 sec  
 RG 71.8  
 DW 62.400 usec  
 DE 6.50 usec  
 TE 296.1 K  
 D1 1.0000000 sec  
 TD0 1

===== CHANNEL f1 =====  
 SFO1 400.1324710 MHz  
 NUC1 1H  
 P1 13.70 usec  
 PLW1 9.17000008 W

F2 - Processing parameters  
 SI 65536  
 SF 400.1299994 MHz  
 WDW EM  
 SSB 0  
 LB 0.30 Hz  
 GB 0  
 PC 1.00

<sup>13</sup>C NMR (DMSO-d<sub>6</sub>, 100 MHz) spectrum of compound **2p**:

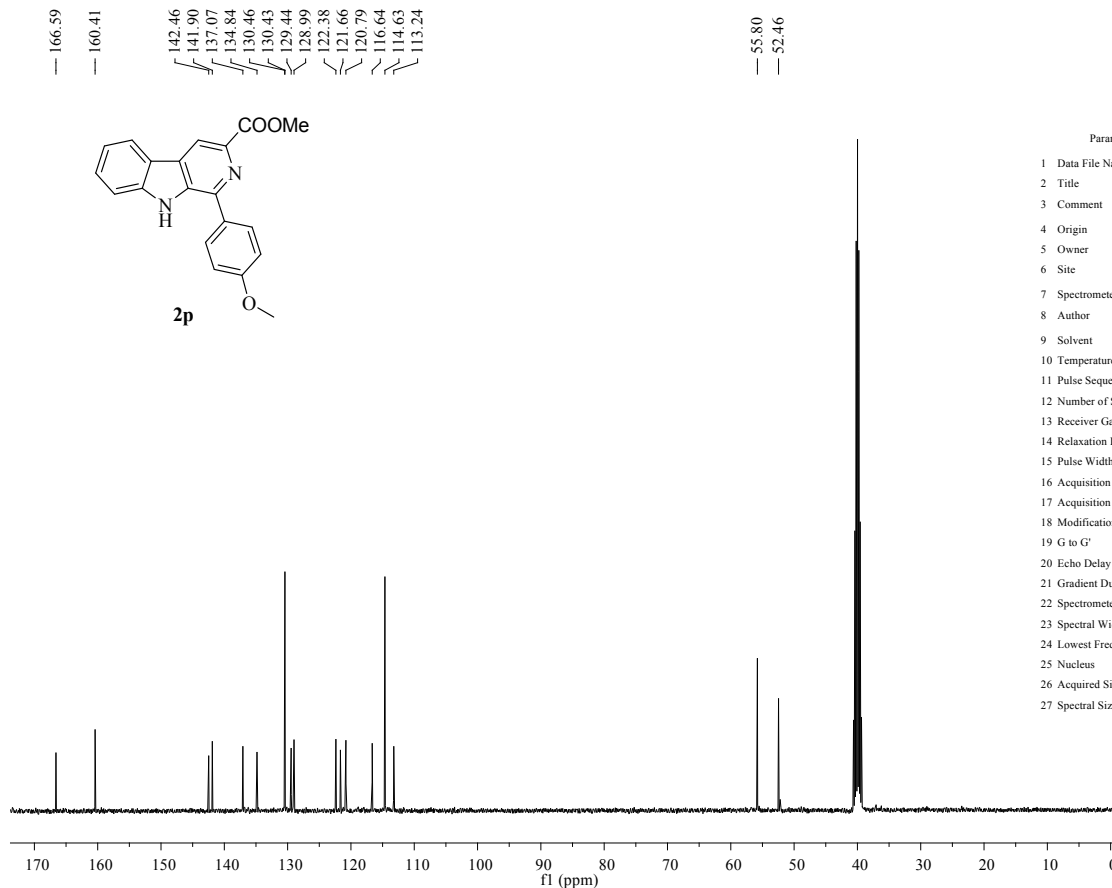

| Parameter                 | Value               |
|---------------------------|---------------------|
| 1 Data File Name          | SXX-XJN-161         |
| 2 Title                   | SXX-XJN-161         |
| 3 Comment                 |                     |
| 4 Origin                  | Bruker BioSpin GmbH |
| 5 Owner                   | nmr                 |
| 6 Site                    |                     |
| 7 Spectrometer            | spect               |
| 8 Author                  |                     |
| 9 Solvent                 | DMSO                |
| 10 Temperature            | 299.2               |
| 11 Pulse Sequence         | zgpg30              |
| 12 Number of Scans        | 512                 |
| 13 Receiver Gain          | 161                 |
| 14 Relaxation Delay       | 2.0000              |
| 15 Pulse Width            | 9.4000              |
| 16 Acquisition Time       | 1.3631              |
| 17 Acquisition Date       | 2013-05-03T22:05:37 |
| 18 Modification Date      | 2013-05-03T22:05:00 |
| 19 G to G'                | 1.00000000          |
| 20 Echo Delay             | 0.0000              |
| 21 Gradient Duration      | 0.0000              |
| 22 Spectrometer Frequency | 100.61              |
| 23 Spectral Width         | 24038.5             |
| 24 Lowest Frequency       | -1958.4             |
| 25 Nucleus                | 13C                 |
| 26 Acquired Size          | 32768               |
| 27 Spectral Size          | 65536               |

<sup>1</sup>H NMR (DMSO-*d*<sub>6</sub>, 400 MHz) spectrum of compound **2q**:

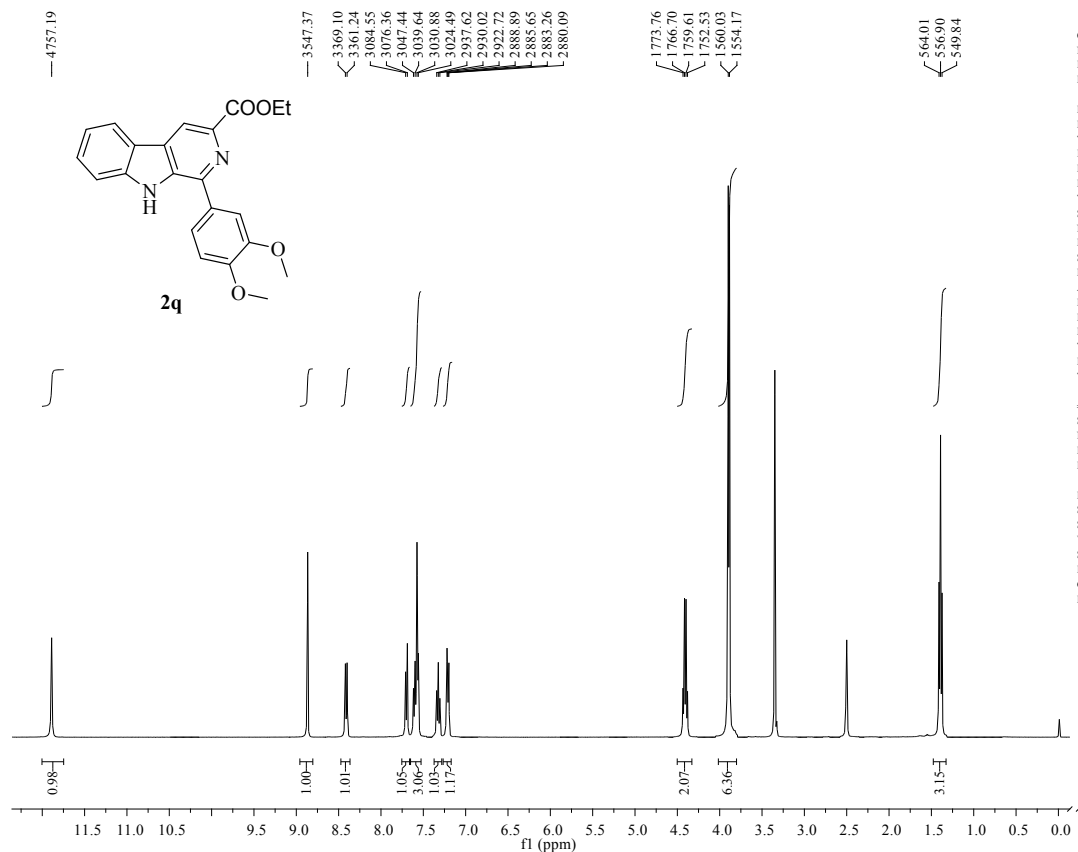

Current Data Parameters  
 NAME 130428-SXX-ZJH-162  
 EXPNO 1  
 PROCNO 1

F2 - Acquisition Parameters  
 Date\_ 20130428  
 Time 10.10  
 INSTRUM spect  
 PROBHD 5 mm PABBO BB/  
 PULPROG zg30  
 TD 65536  
 SOLVENT DMSO  
 NS 8  
 DS 2  
 SWH 8012.820 Hz  
 FIDRES 0.122266 Hz  
 AQ 4.0894465 sec  
 RG 64  
 DW 62.400 usec  
 DE 6.50 usec  
 TE 296.0 K  
 D1 1.00000000 sec  
 TD0 1

==== CHANNEL f1 =====  
 SFO1 400.1324710 MHz  
 NUC1 1H  
 P1 13.70 usec  
 PLW1 9.17000008 W

F2 - Processing parameters  
 SI 65536  
 SF 400.129985 MHz  
 WDW EM  
 SSB 0  
 LB 0.30 Hz  
 GB 0  
 PC 1.00

<sup>13</sup>C NMR (DMSO-*d*<sub>6</sub>, 100 MHz) spectrum of compound **2q**:

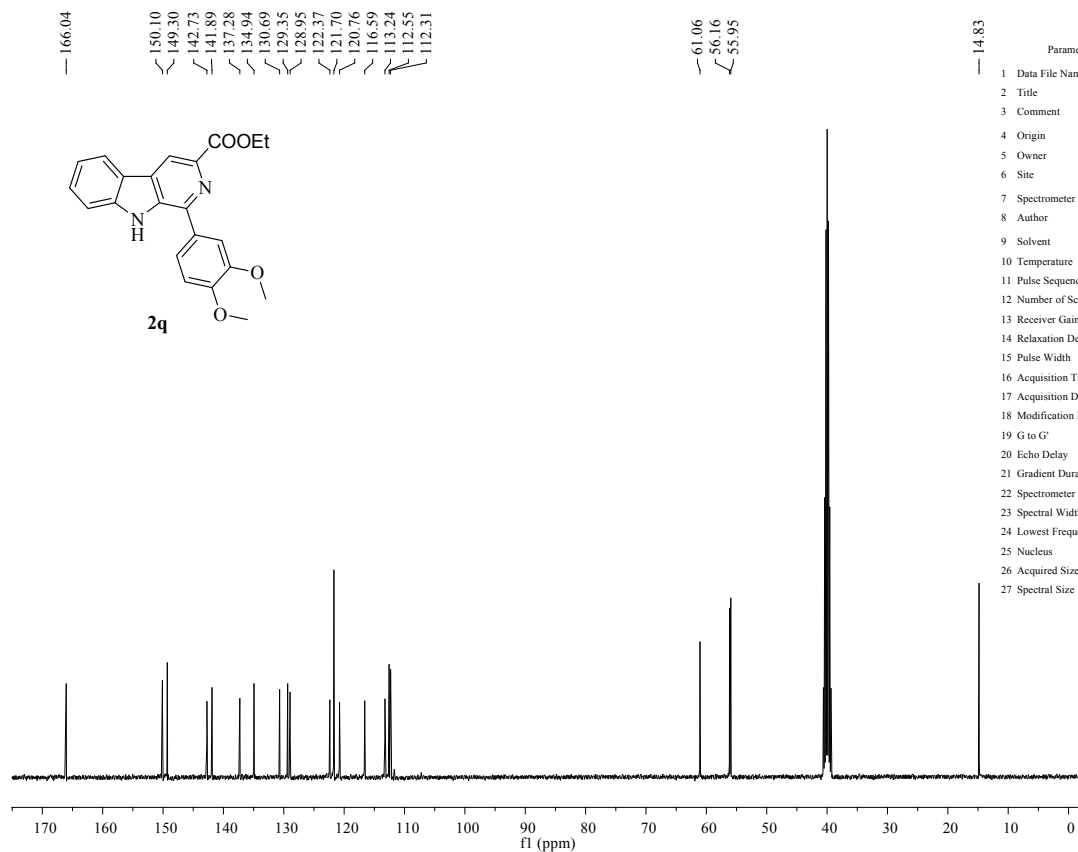

| Parameter                 | Value               |
|---------------------------|---------------------|
| 1 Data File Name          | SXX-XJN-162 (C)     |
| 2 Title                   | SXX-XJN-162 (C)     |
| 3 Comment                 |                     |
| 4 Origin                  | Bruker BioSpin GmbH |
| 5 Owner                   | nmr                 |
| 6 Site                    |                     |
| 7 Spectrometer            | spect               |
| 8 Author                  |                     |
| 9 Solvent                 | DMSO                |
| 10 Temperature            | 299.2               |
| 11 Pulse Sequence         | zgpg30              |
| 12 Number of Scans        | 512                 |
| 13 Receiver Gain          | 181                 |
| 14 Relaxation Delay       | 2.0000              |
| 15 Pulse Width            | 9.4000              |
| 16 Acquisition Time       | 1.3631              |
| 17 Acquisition Date       | 2013-05-03T22:37:58 |
| 18 Modification Date      | 2013-05-03T22:37:00 |
| 19 G to G'                | 1.00000000          |
| 20 Echo Delay             | 0.0000              |
| 21 Gradient Duration      | 0.0000              |
| 22 Spectrometer Frequency | 100.61              |
| 23 Spectral Width         | 24038.5             |
| 24 Lowest Frequency       | -1958.4             |
| 25 Nucleus                | 13C                 |
| 26 Acquired Size          | 32768               |
| 27 Spectral Size          | 65536               |

<sup>1</sup>H NMR (DMSO-*d*<sub>6</sub>, 400 MHz) spectrum of compound **2r**:

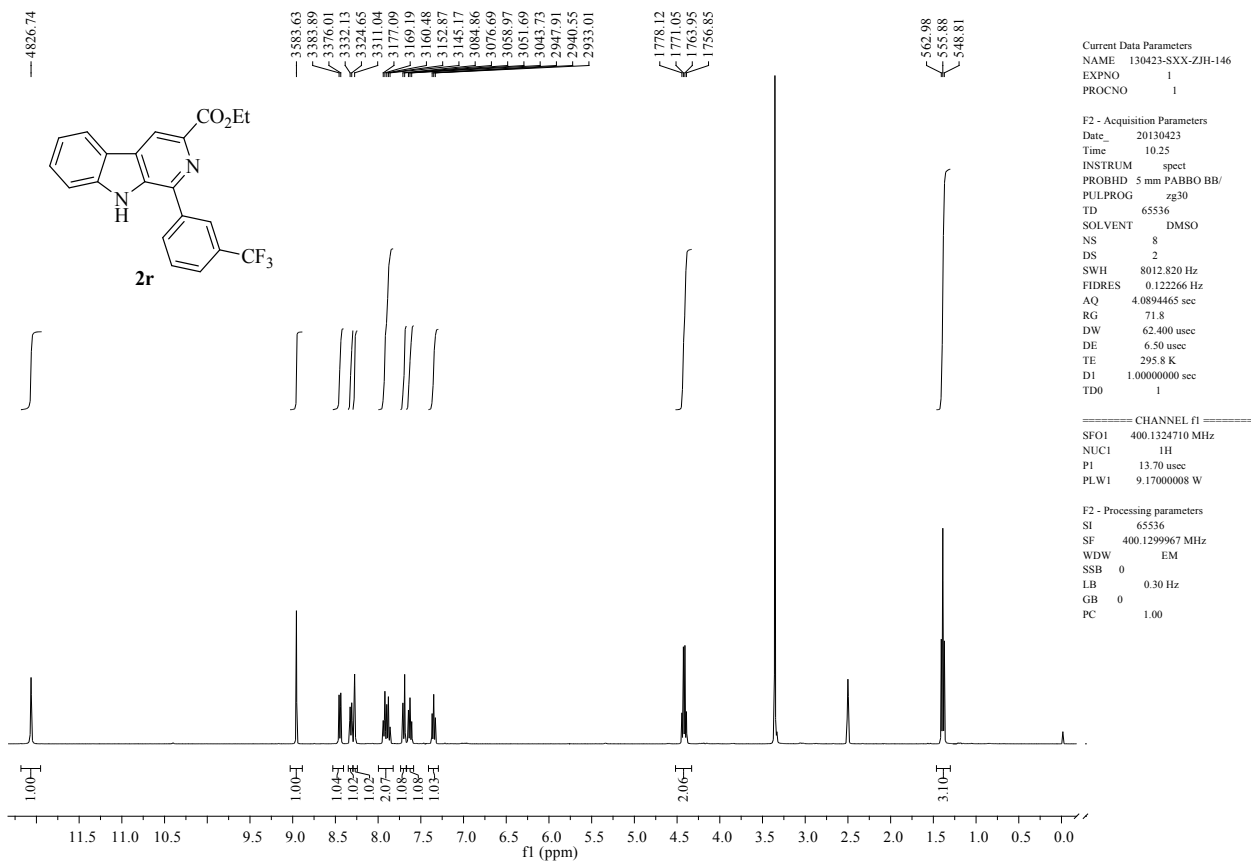

<sup>13</sup>C NMR (DMSO-*d*<sub>6</sub>, 100 MHz) spectrum of compound **2r**:

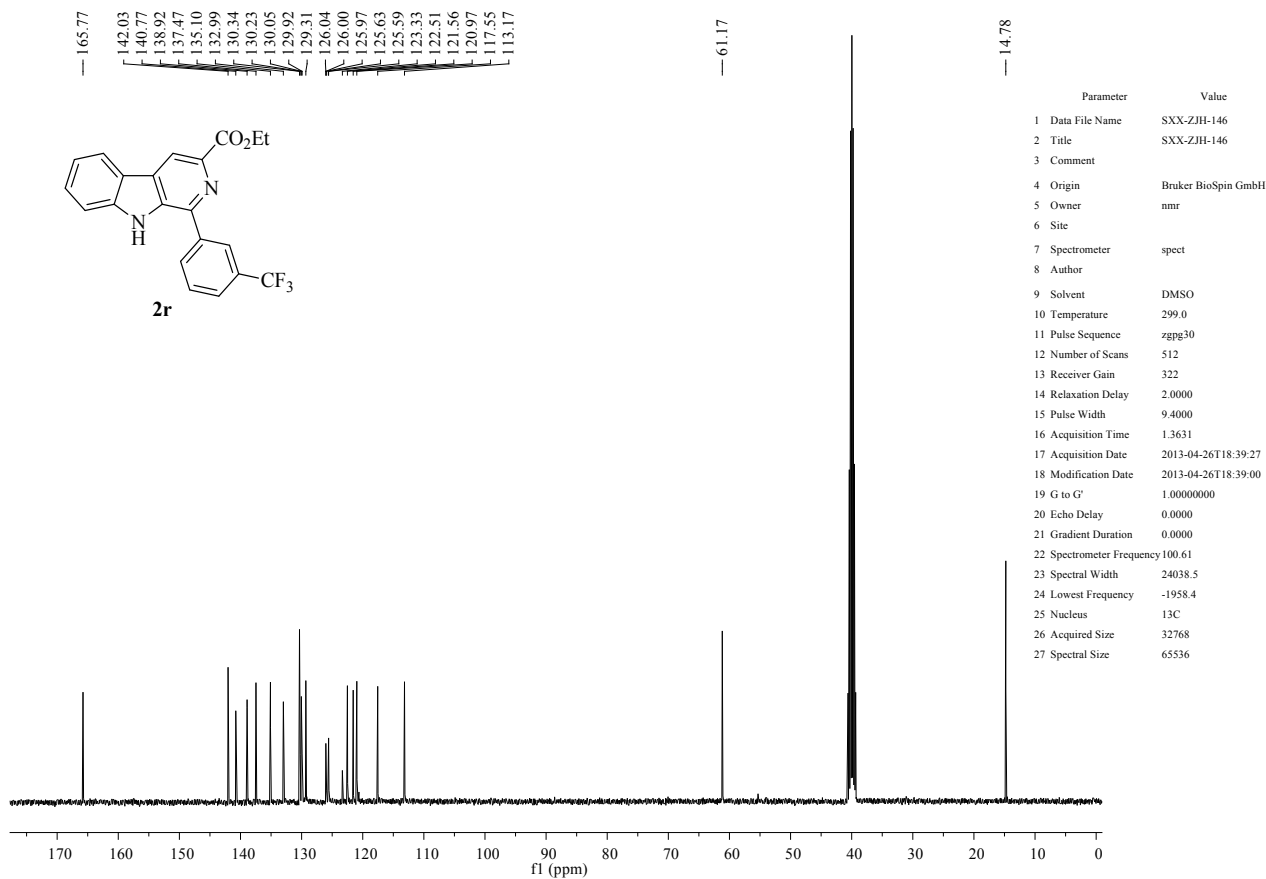

<sup>1</sup>H NMR (DMSO-*d*<sub>6</sub>, 400 MHz) spectrum of compound **2s**:

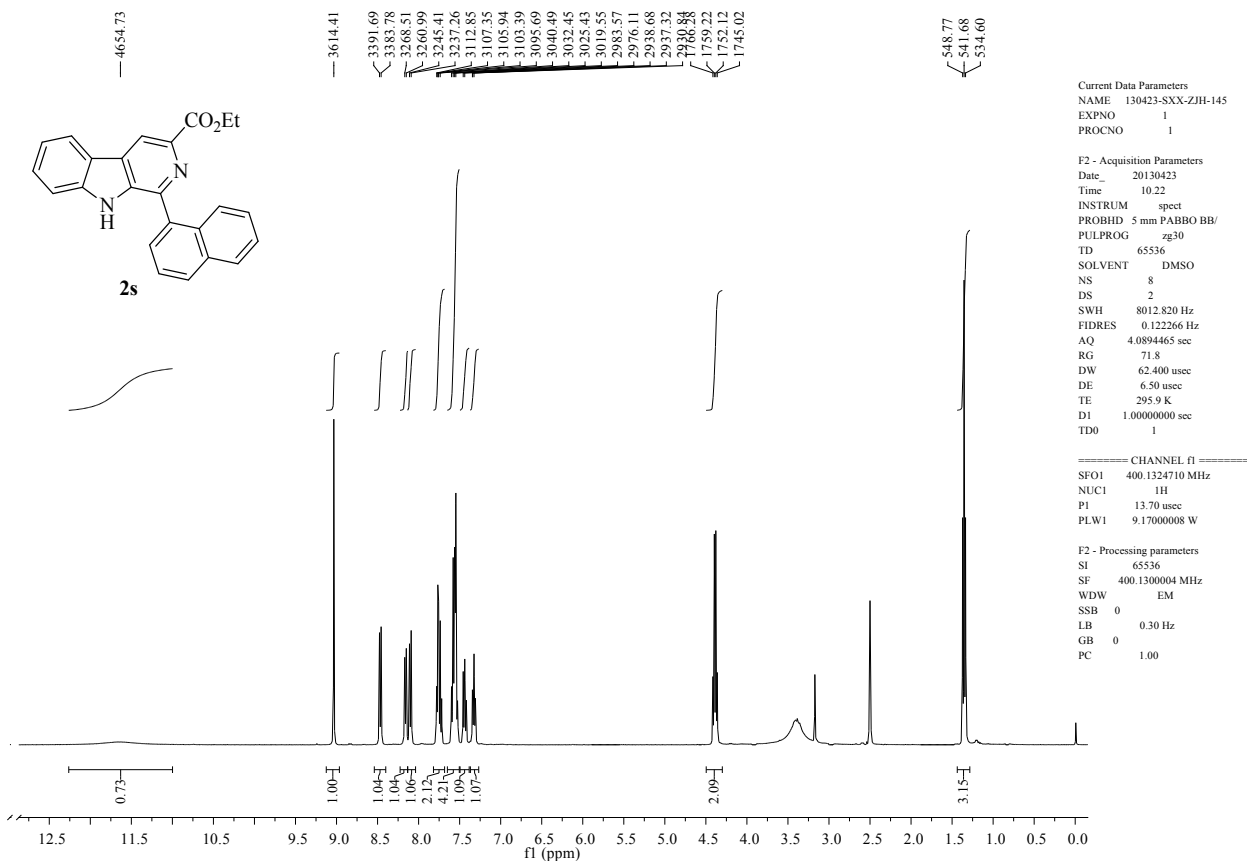

<sup>13</sup>C NMR (DMSO-*d*<sub>6</sub>, 100 MHz) spectrum of compound **2s**:

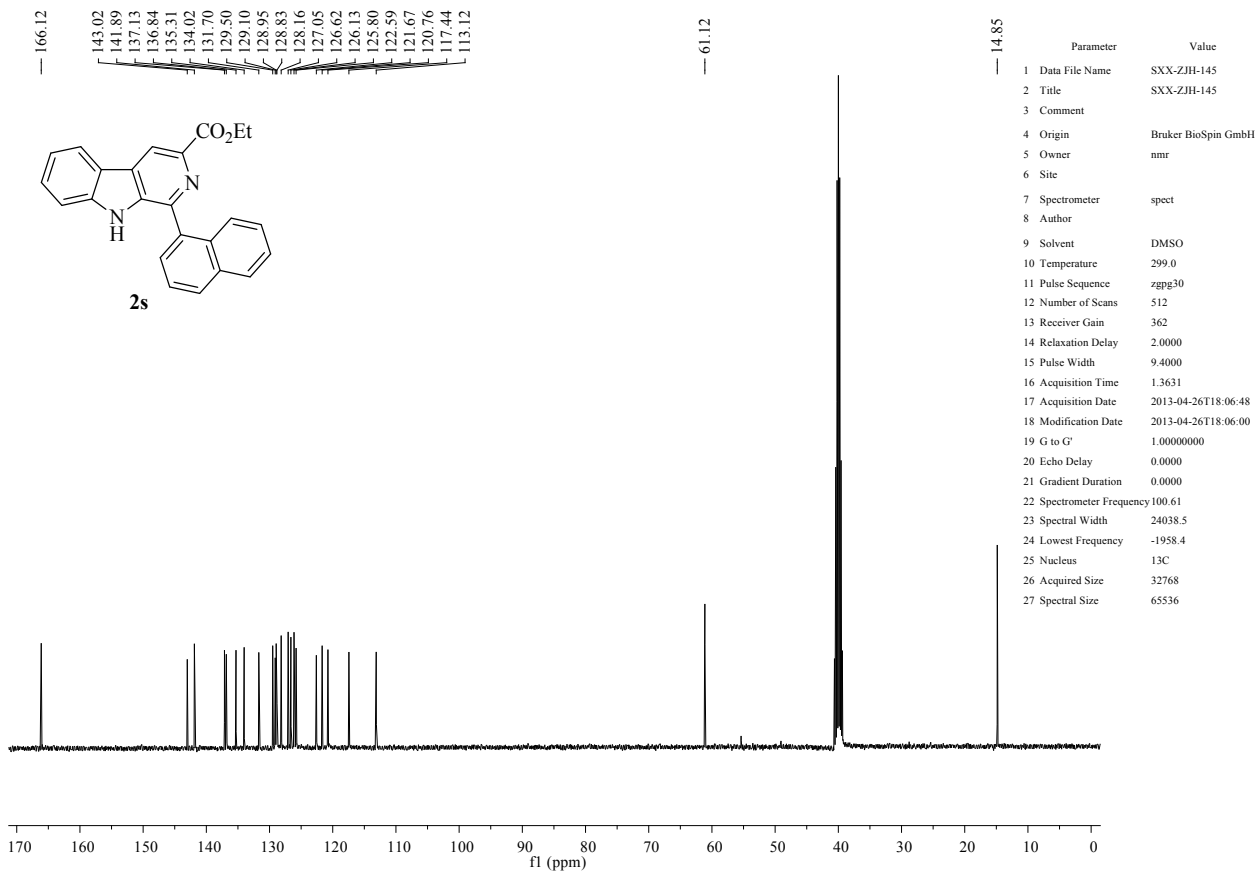

<sup>1</sup>H NMR (DMSO-*d*<sub>6</sub>, 400 MHz) spectrum of compound **2t**:

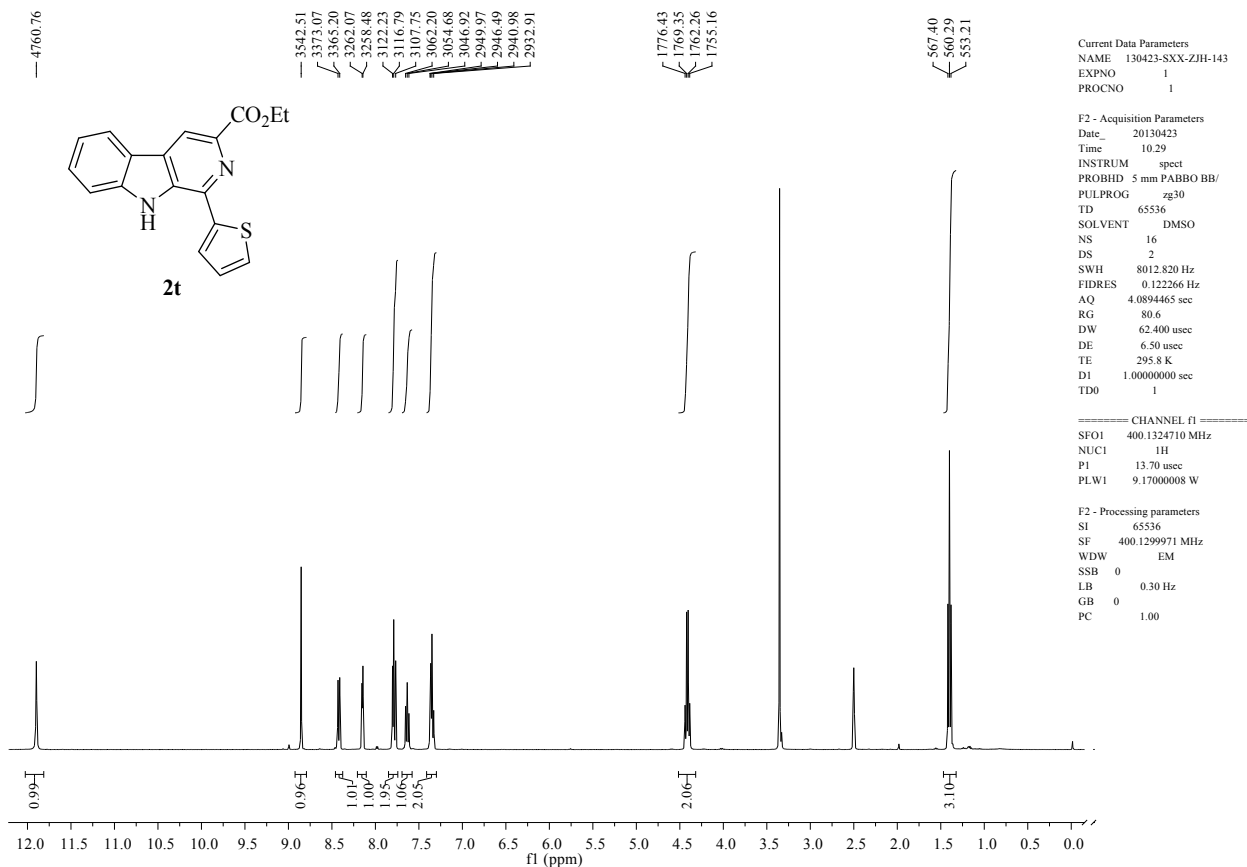

<sup>13</sup>C NMR (DMSO-*d*<sub>6</sub>, 100 MHz) spectrum of compound **2t**:

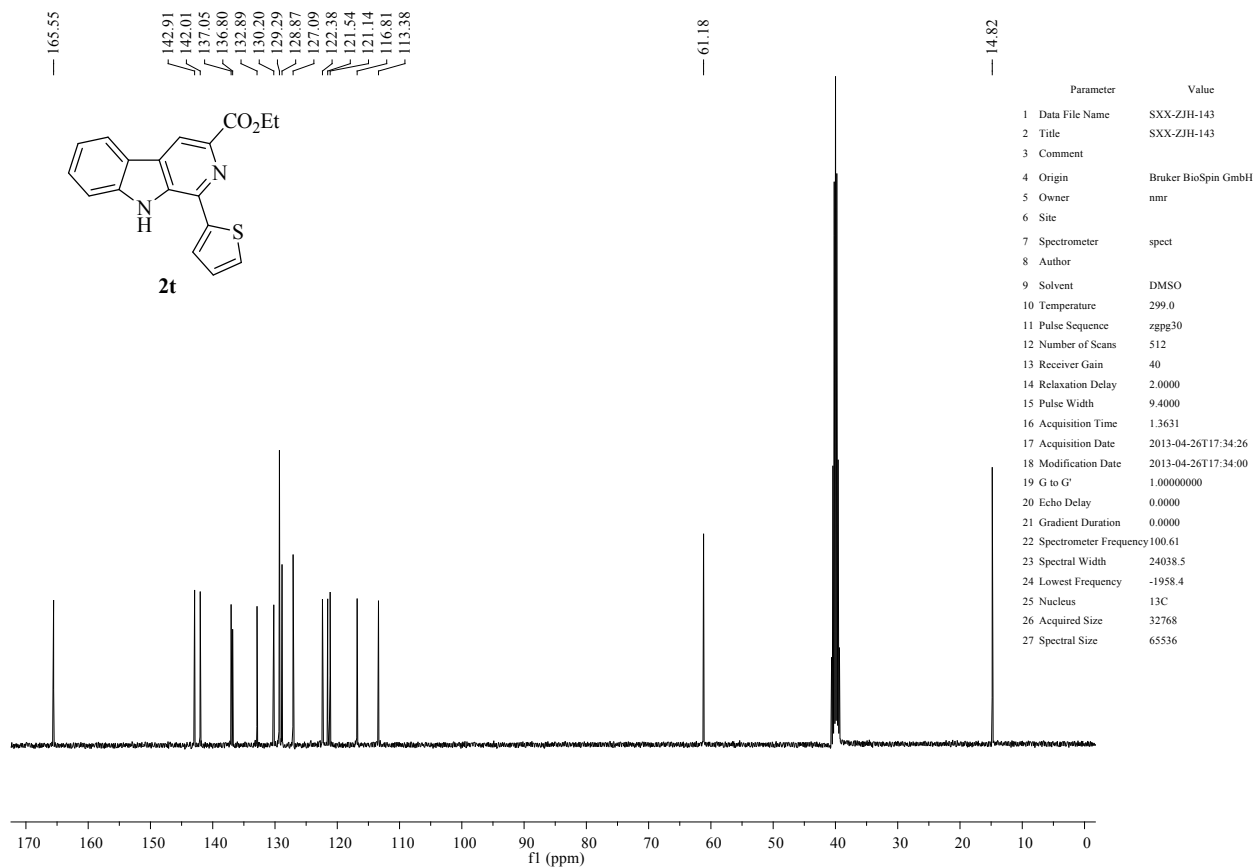

<sup>1</sup>H NMR (DMSO-*d*<sub>6</sub>, 400 MHz) spectrum of compound **2u**:

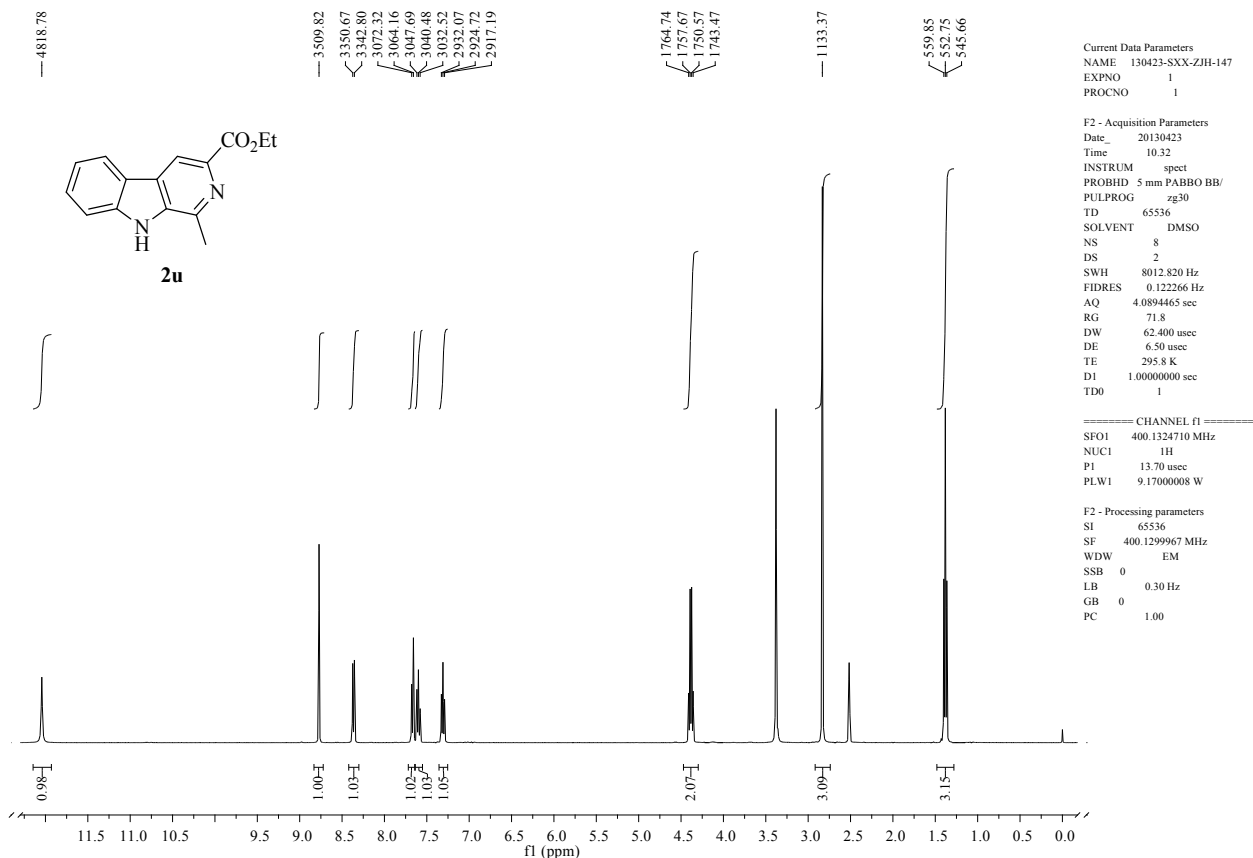

<sup>13</sup>C NMR (DMSO-*d*<sub>6</sub>, 100 MHz) spectrum of compound **2u**:

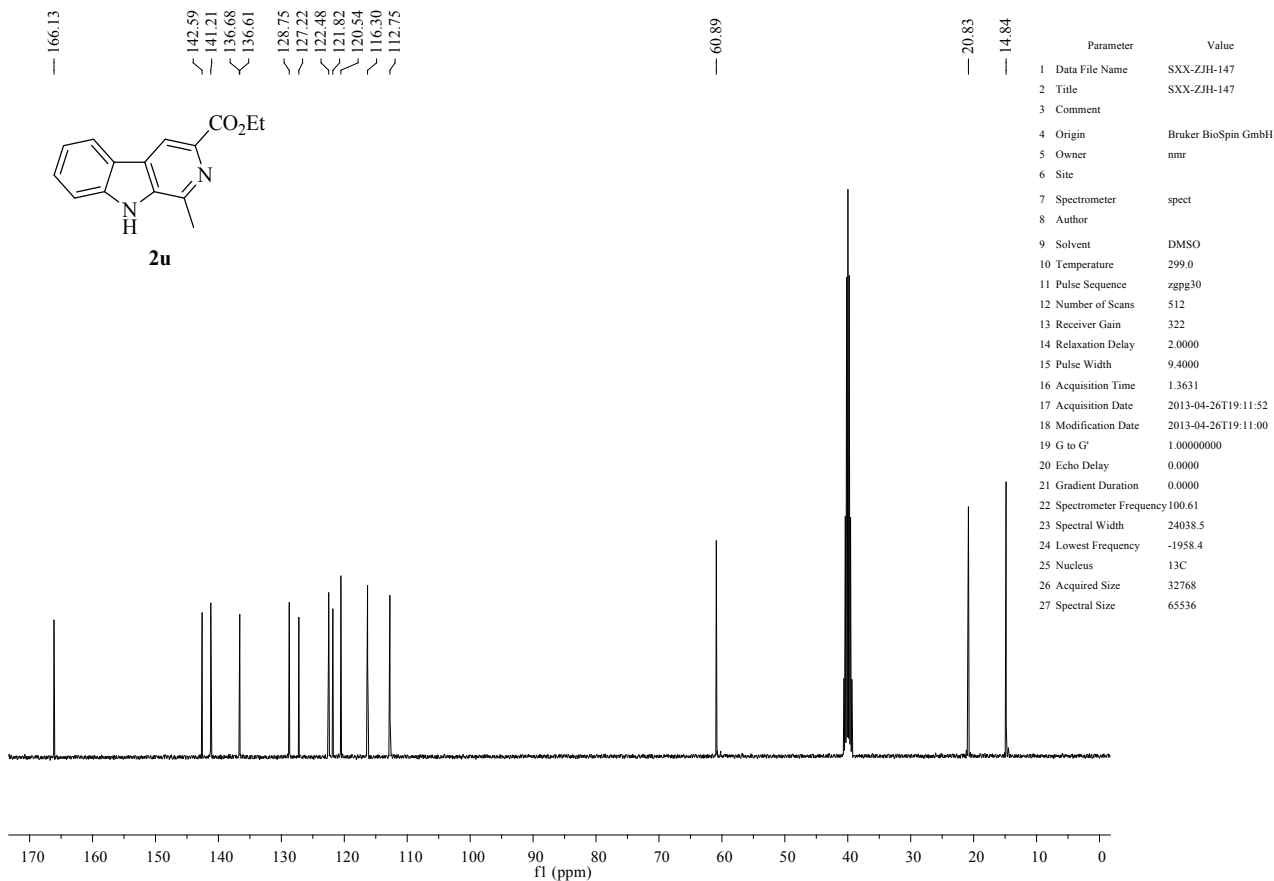

<sup>1</sup>H NMR (DMSO-*d*<sub>6</sub>, 400 MHz) spectrum of compound **2v**:

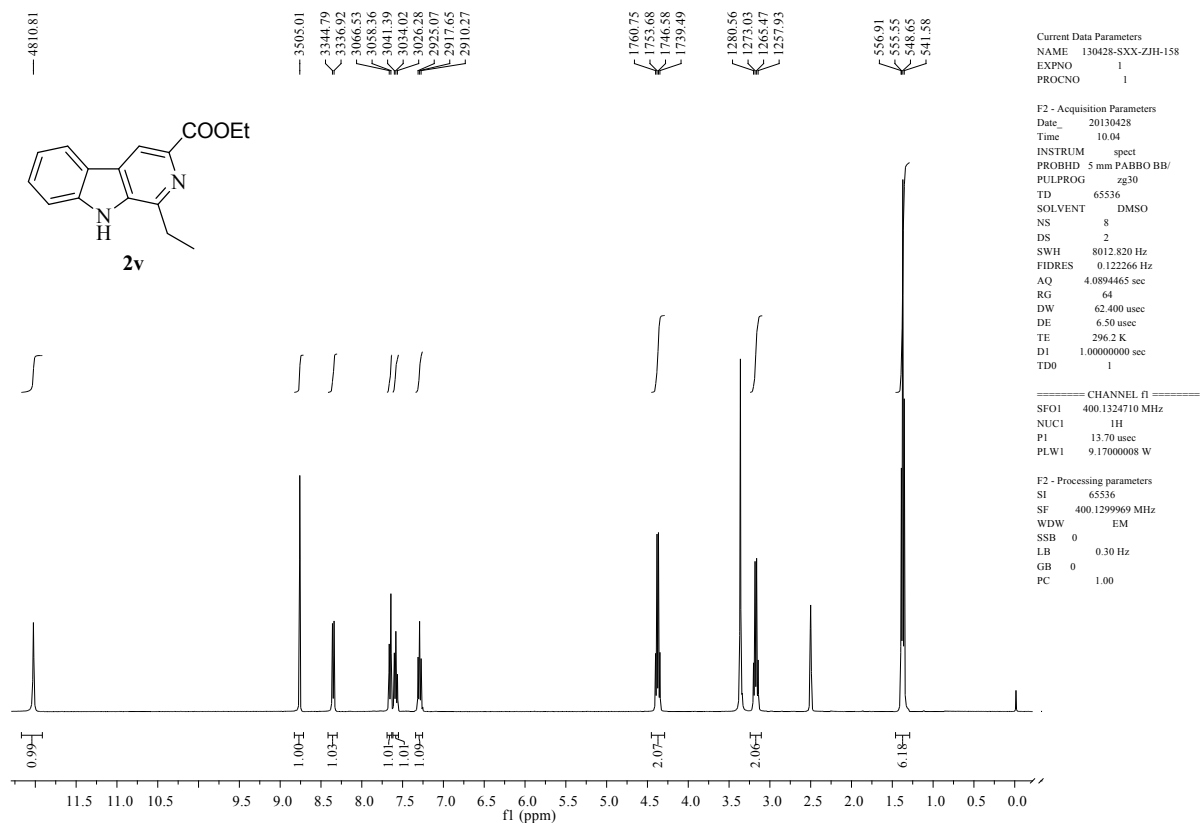

<sup>13</sup>C NMR (DMSO-*d*<sub>6</sub>, 100 MHz) spectrum of compound **2v**:

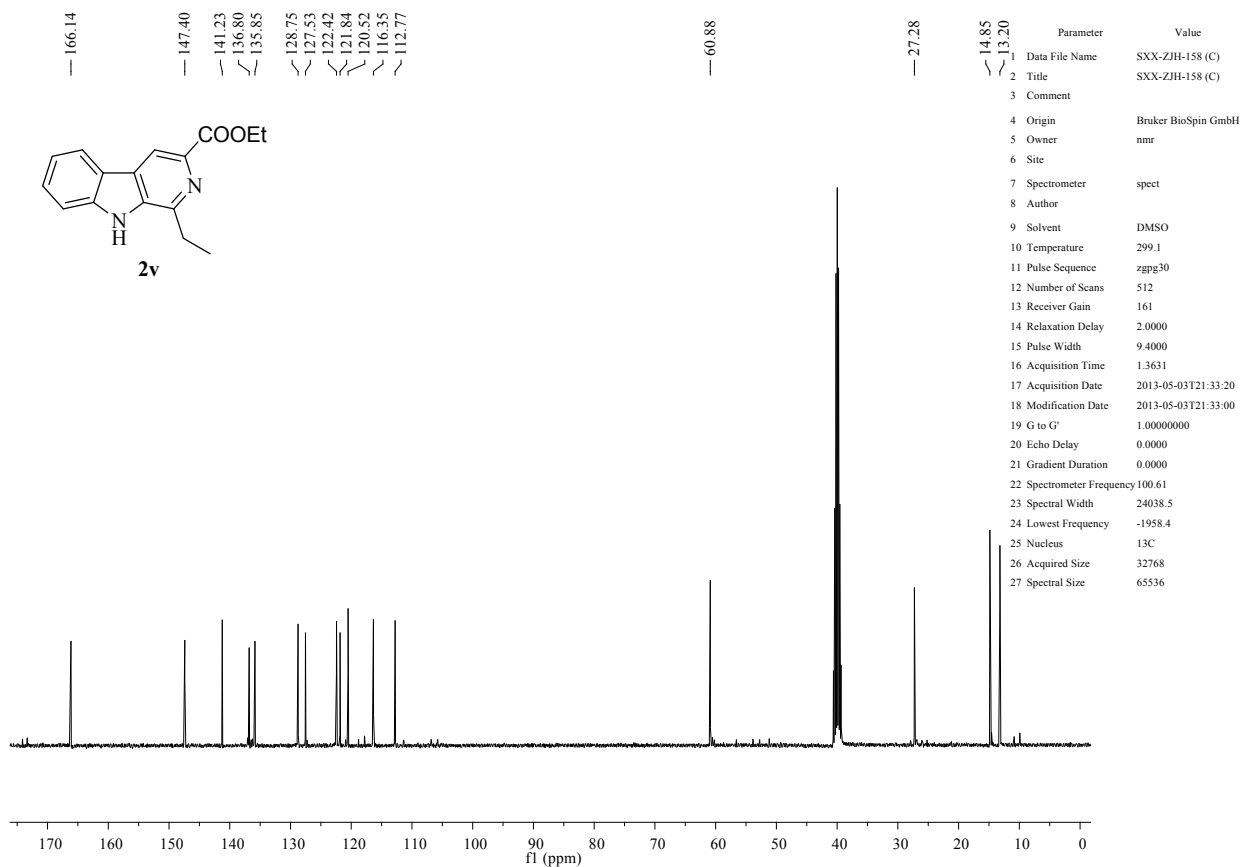



<sup>1</sup>H NMR (DMSO-*d*<sub>6</sub>, 400 MHz) spectrum of compound **2w**:

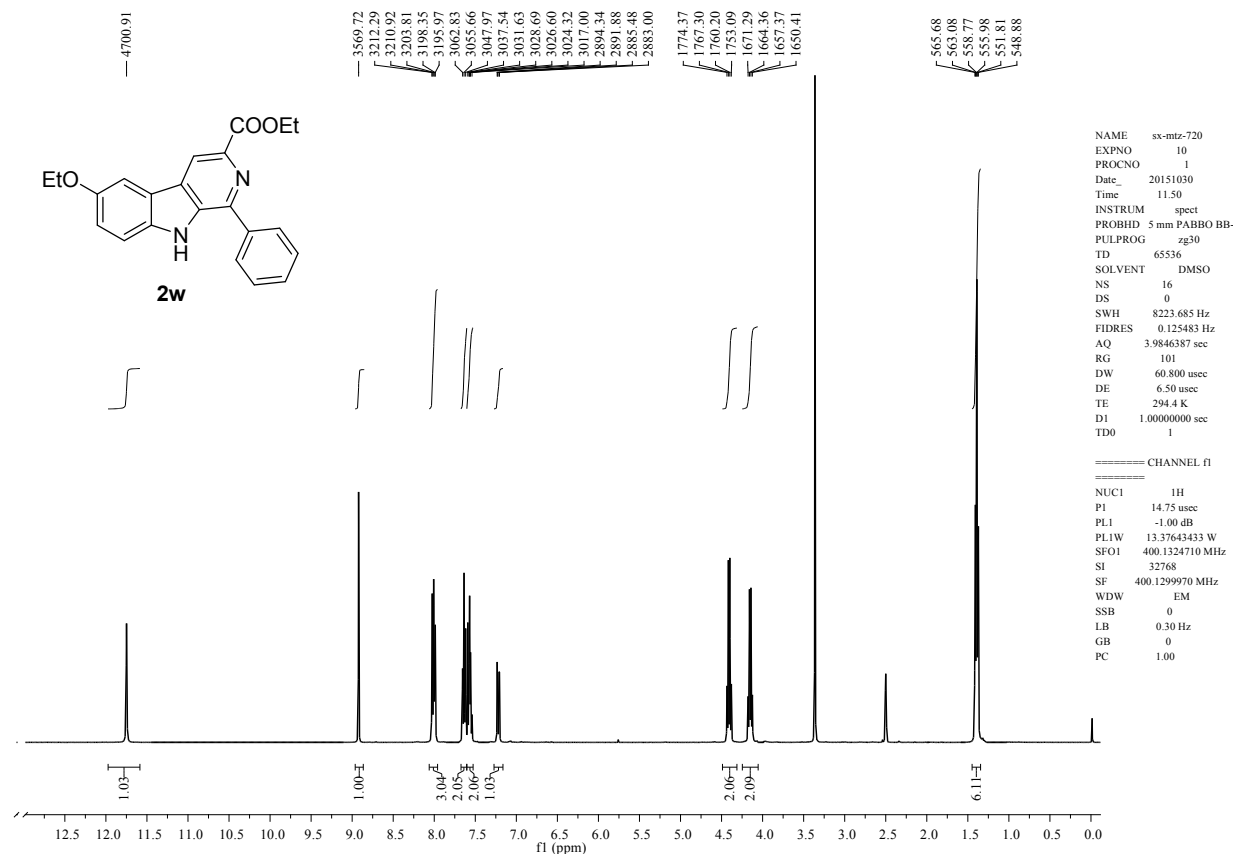

<sup>13</sup>C NMR (DMSO-*d*<sub>6</sub>, 100 MHz) spectrum of compound **2w**:

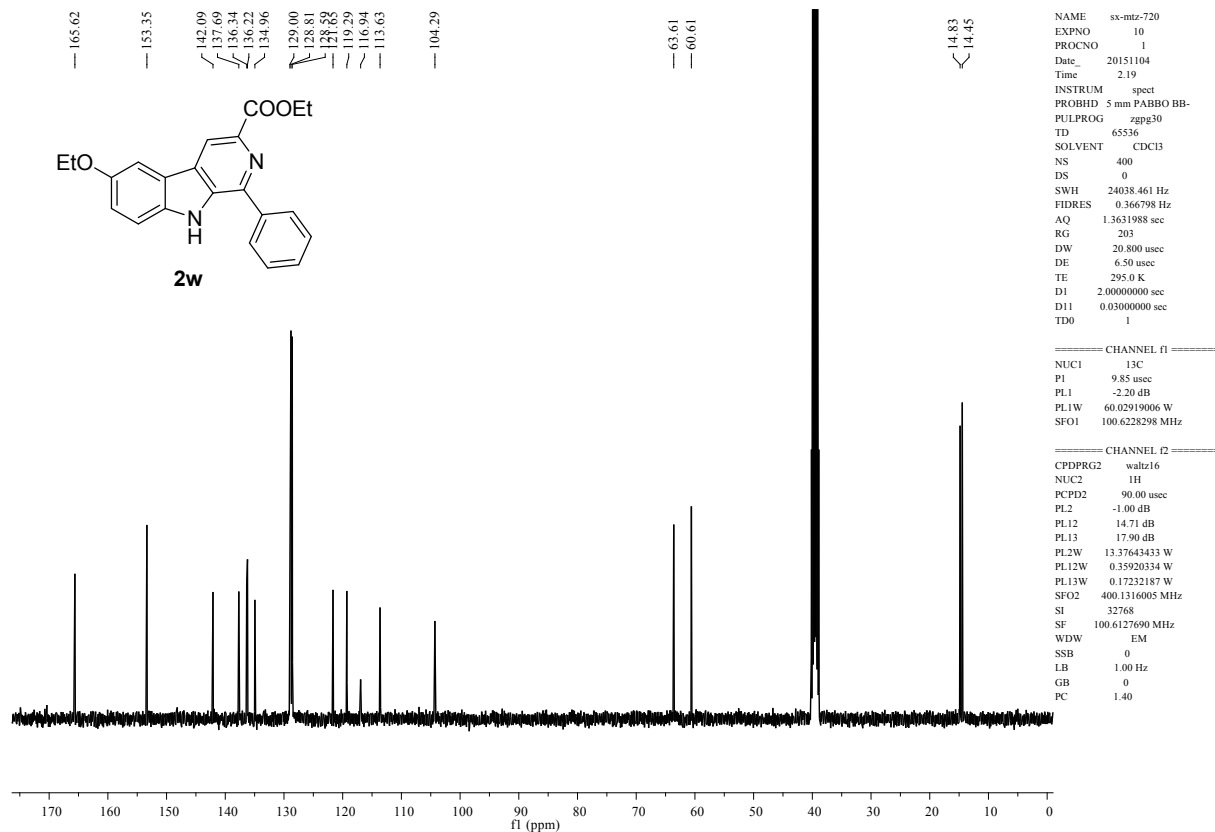

<sup>1</sup>H NMR (DMSO-d<sub>6</sub>, 400 MHz) spectrum of compound **2x**:

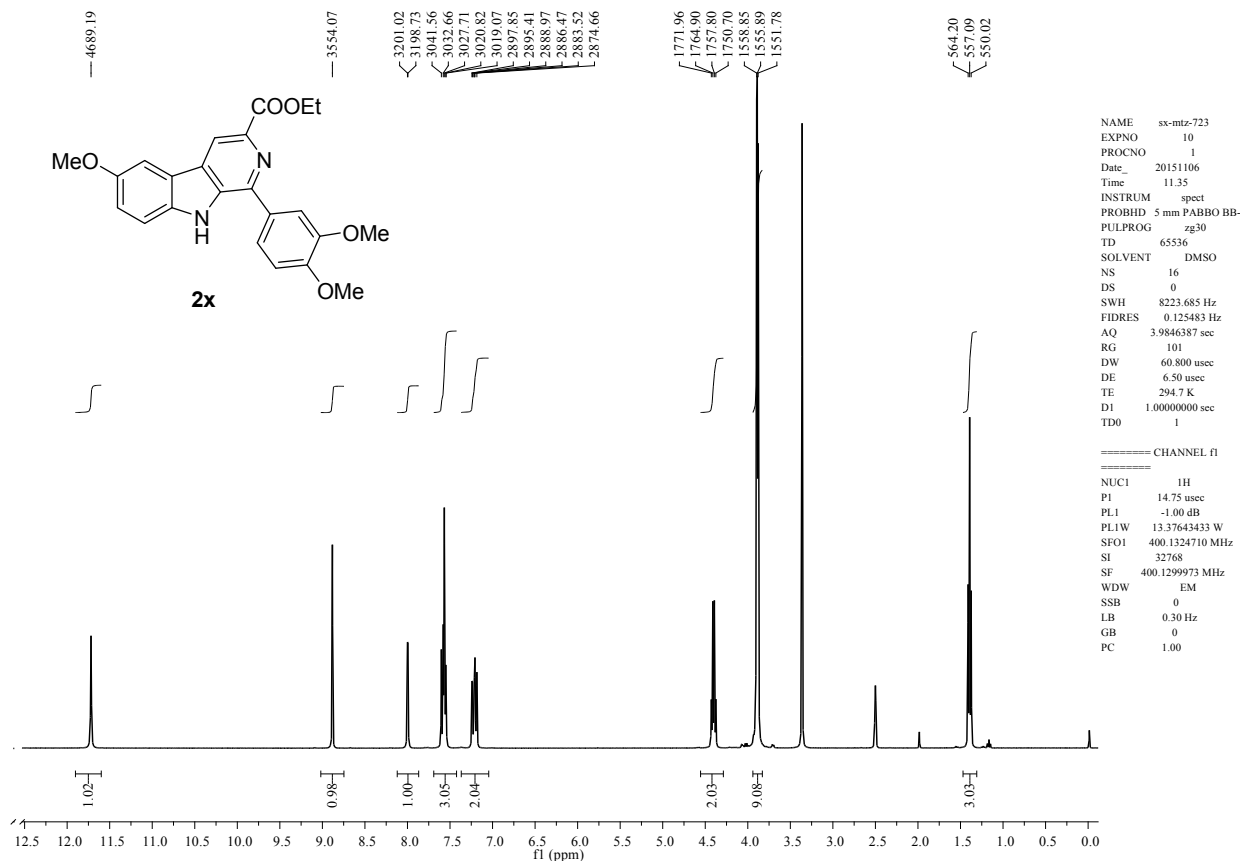

<sup>13</sup>C NMR (DMSO-d<sub>6</sub>, 100 MHz) spectrum of compound **2x**:

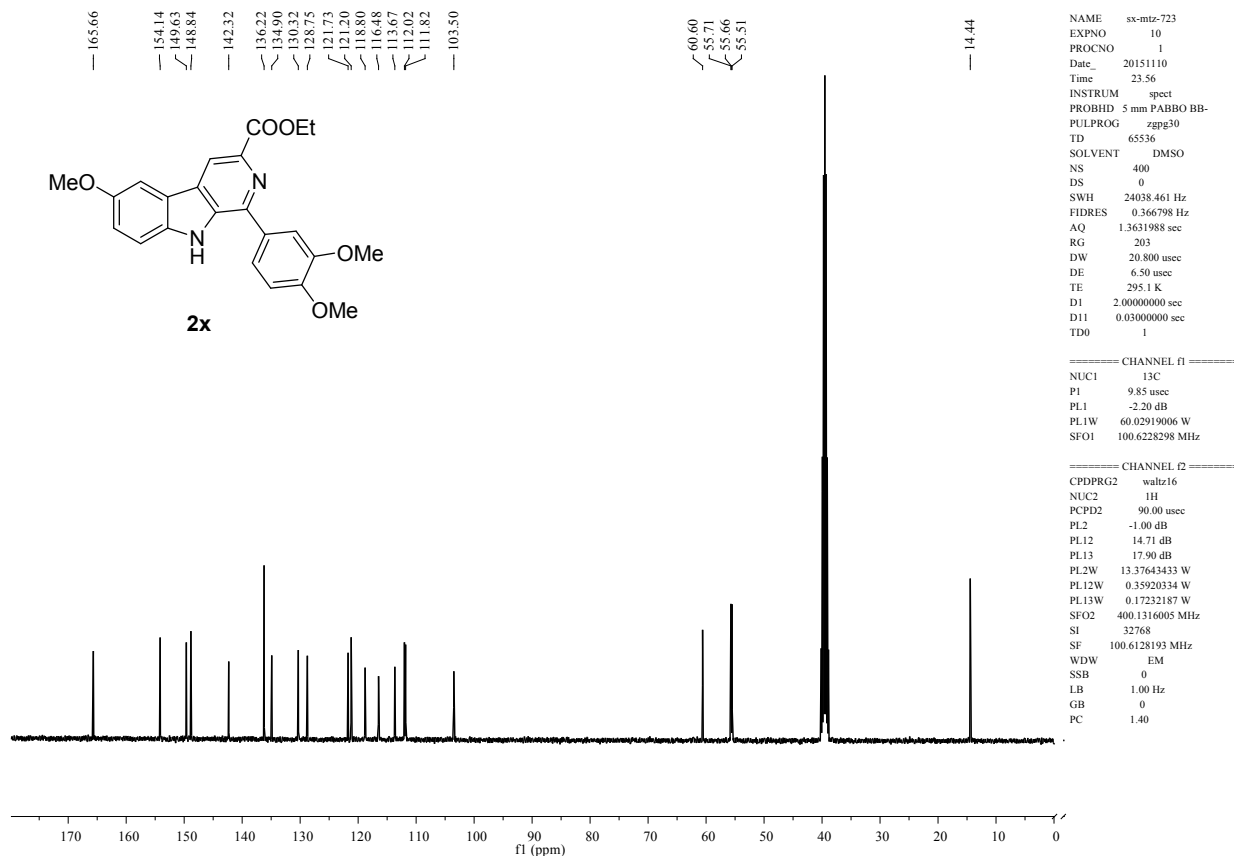

<sup>1</sup>H NMR (DMSO-*d*<sub>6</sub>, 400 MHz) spectrum of perlolyrine **3**:

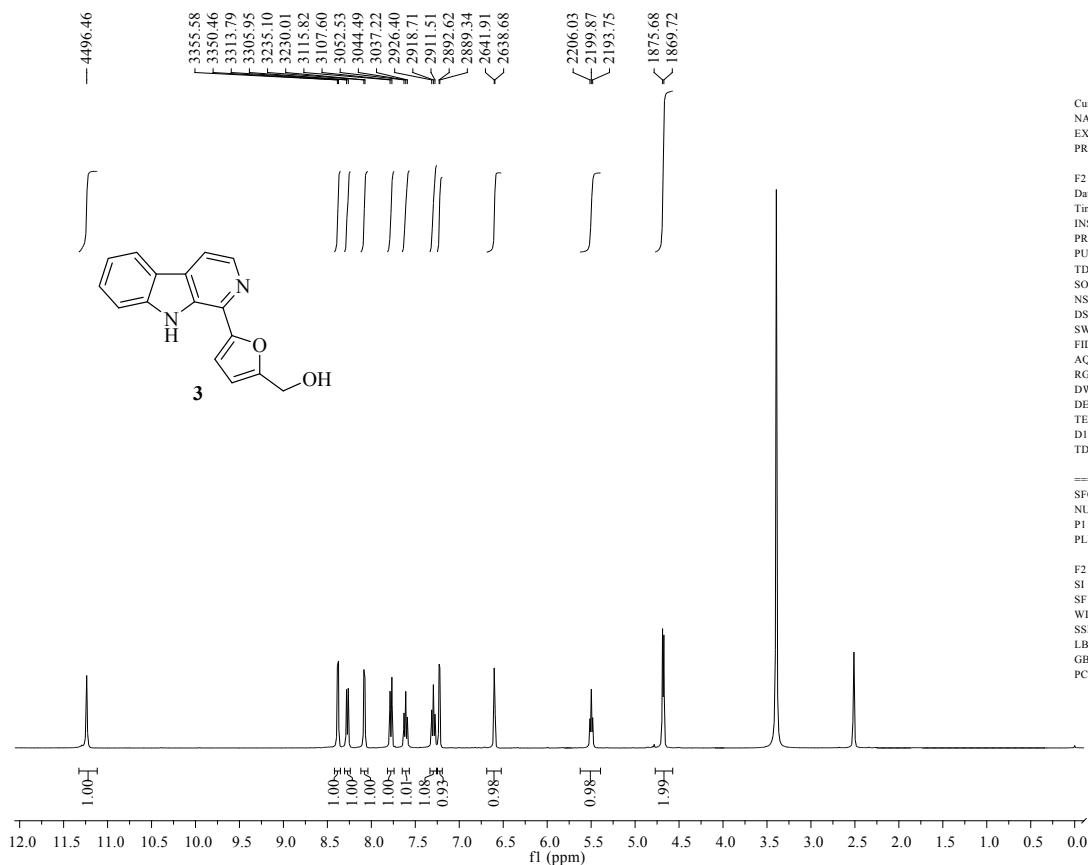

Current Data Parameters  
 NAME SXX-ZB-302  
 EXPNO 1  
 PROCNO 1

F2 - Acquisition Parameters  
 Date\_ 20130909  
 Time 16.33  
 INSTRUM spect  
 PROBHD 5 mm PABBO BB/  
 PULPROG zg30  
 TD 65536  
 SOLVENT DMSO  
 NS 8  
 DS 2  
 SWH 8012.820 Hz  
 FIDRES 0.122266 Hz  
 AQ 4.0894465 sec  
 RG 80.6  
 DW 62.400 usec  
 DE 6.50 usec  
 TE 294.0 K  
 D1 1.00000000 sec  
 TD0 1

==== CHANNEL f1 =====  
 SFO1 400.1324710 MHz  
 NUC1 1H  
 P1 13.70 usec  
 PLW1 9.17000008 W

F2 - Processing parameters  
 SI 65536  
 SF 400.1299987 MHz  
 WDW EM  
 SSB 0  
 LB 0.30 Hz  
 GB 0  
 PC 1.00

<sup>13</sup>C NMR (DMSO-*d*<sub>6</sub>, 100 MHz) spectrum of perlolyrine **3**:

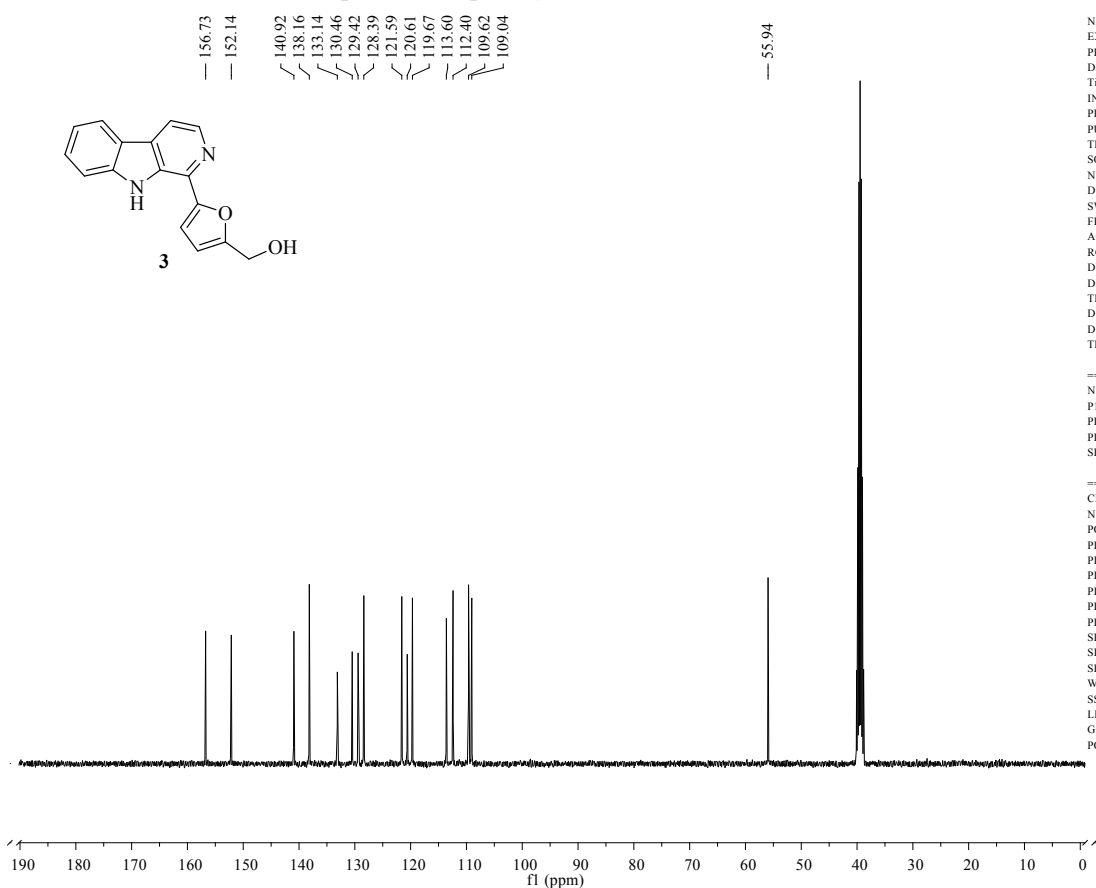

NAME sx-zb-302  
 EXPNO 10  
 PROCNO 1  
 Date\_ 20130916  
 Time 21.10  
 INSTRUM spect  
 PROBHD 5 mm PABBO BB-  
 PULPROG zgpg30  
 TD 65536  
 SOLVENT DMSO  
 NS 400  
 DS 0  
 SWH 24038.461 Hz  
 FIDRES 0.366798 Hz  
 AQ 1.3631988 sec  
 RG 203  
 DW 20.800 usec  
 DE 6.50 usec  
 TE 295.9 K  
 D1 2.00000000 sec  
 D11 0.03000000 sec  
 TD0 1

==== CHANNEL f1 =====  
 NUC1 13C  
 P1 9.85 usec  
 PL1 -2.20 dB  
 PL1W 60.02919006 W  
 SFO1 100.6228298 MHz

==== CHANNEL f2 =====  
 CPDPRG2 waltz16  
 NUC2 1H  
 PCPD2 90.00 usec  
 PL2 -1.00 dB  
 PL12 14.71 dB  
 PL13 17.90 dB  
 PL2W 13.37643433 W  
 PL12W 0.35920334 W  
 PL13W 0.17232187 W  
 SFO2 400.1316005 MHz  
 SI 32768  
 SF 100.6128193 MHz  
 WDW EM  
 SSB 0  
 LB 1.00 Hz  
 GB 0  
 PC 1.40

<sup>1</sup>H NMR (DMSO-*d*<sub>6</sub>, 400 MHz) spectrum of flazin 4:

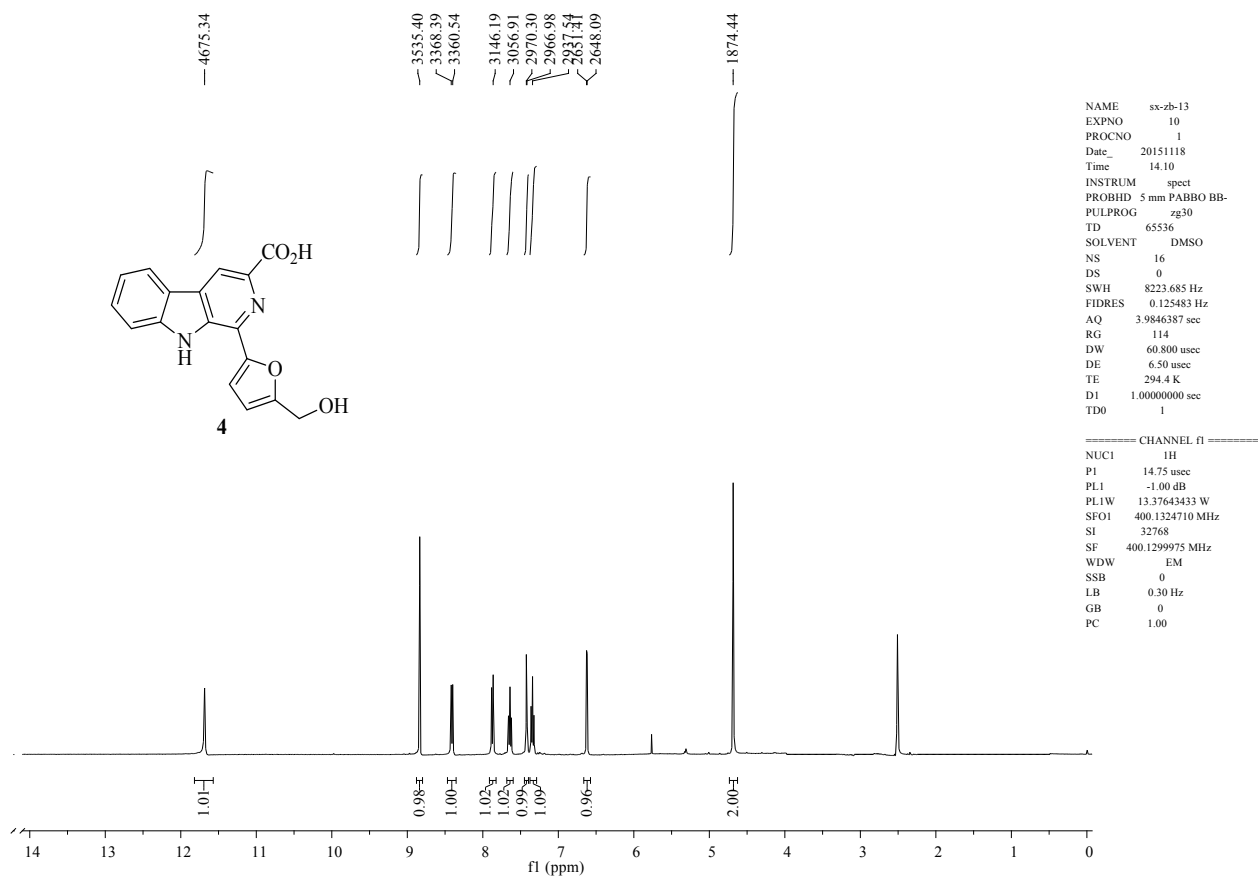

<sup>13</sup>C NMR (DMSO-*d*<sub>6</sub>, 100 MHz) spectrum of flazin 4:

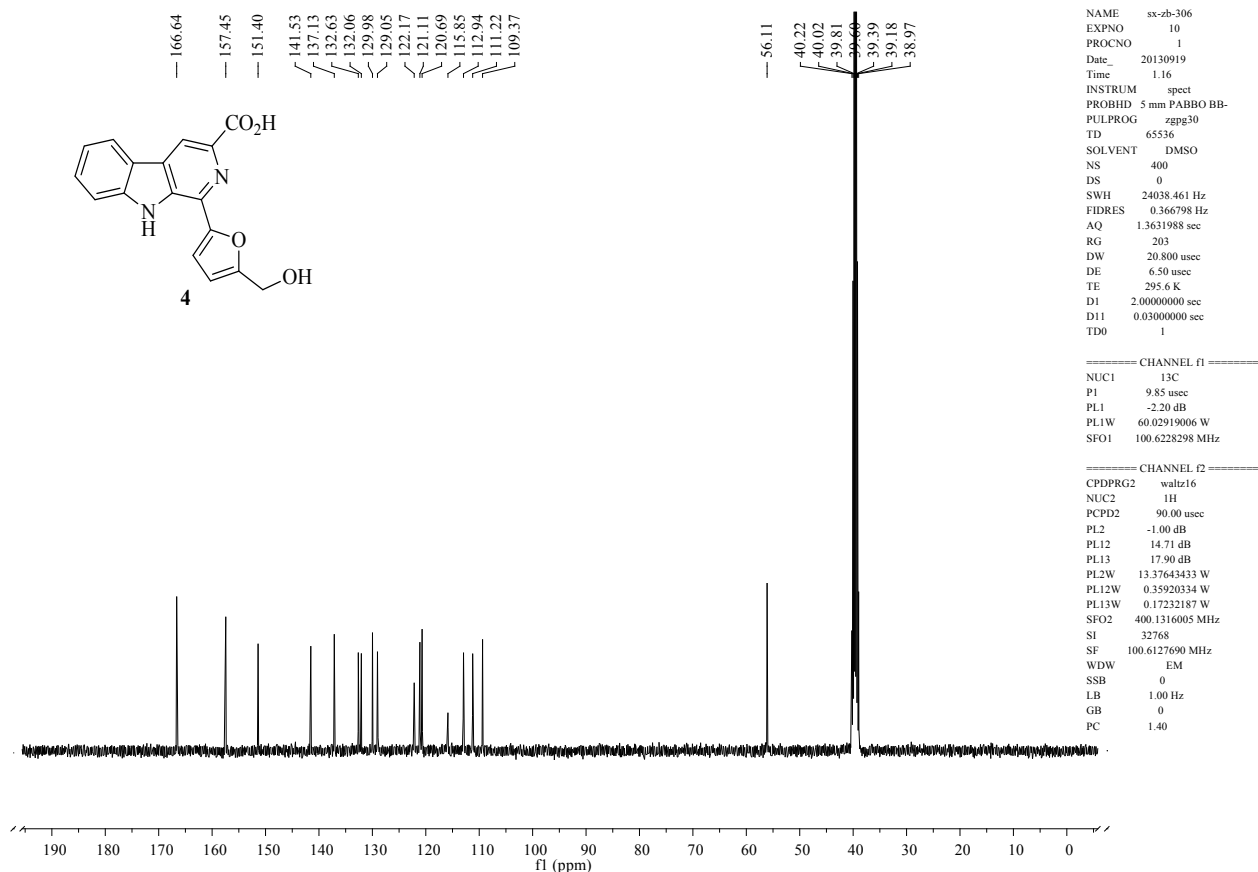

<sup>1</sup>H NMR (CDCl<sub>3</sub>, 400 MHz) spectrum of compound **5**:

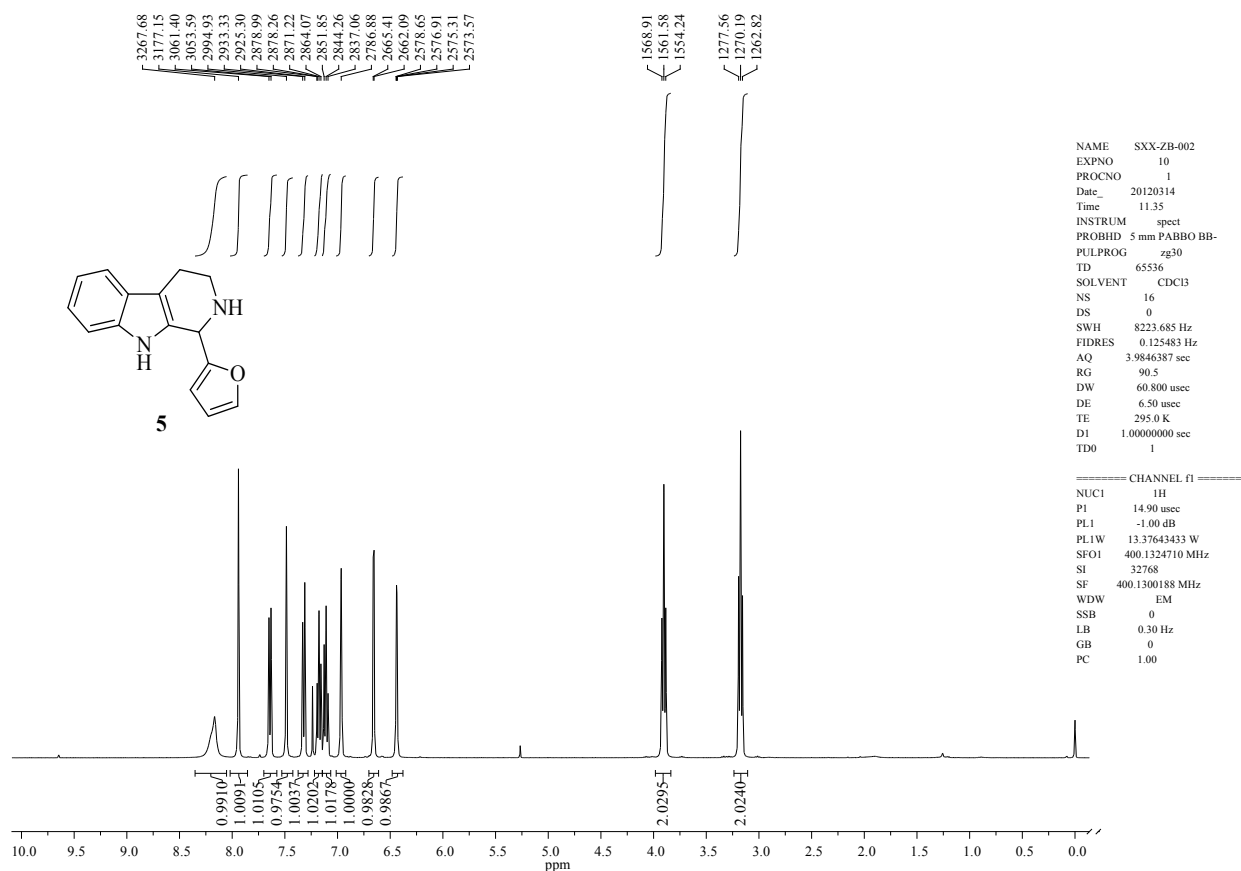

<sup>13</sup>C NMR (CDCl<sub>3</sub>, 100 MHz) spectrum of compound **9a**:

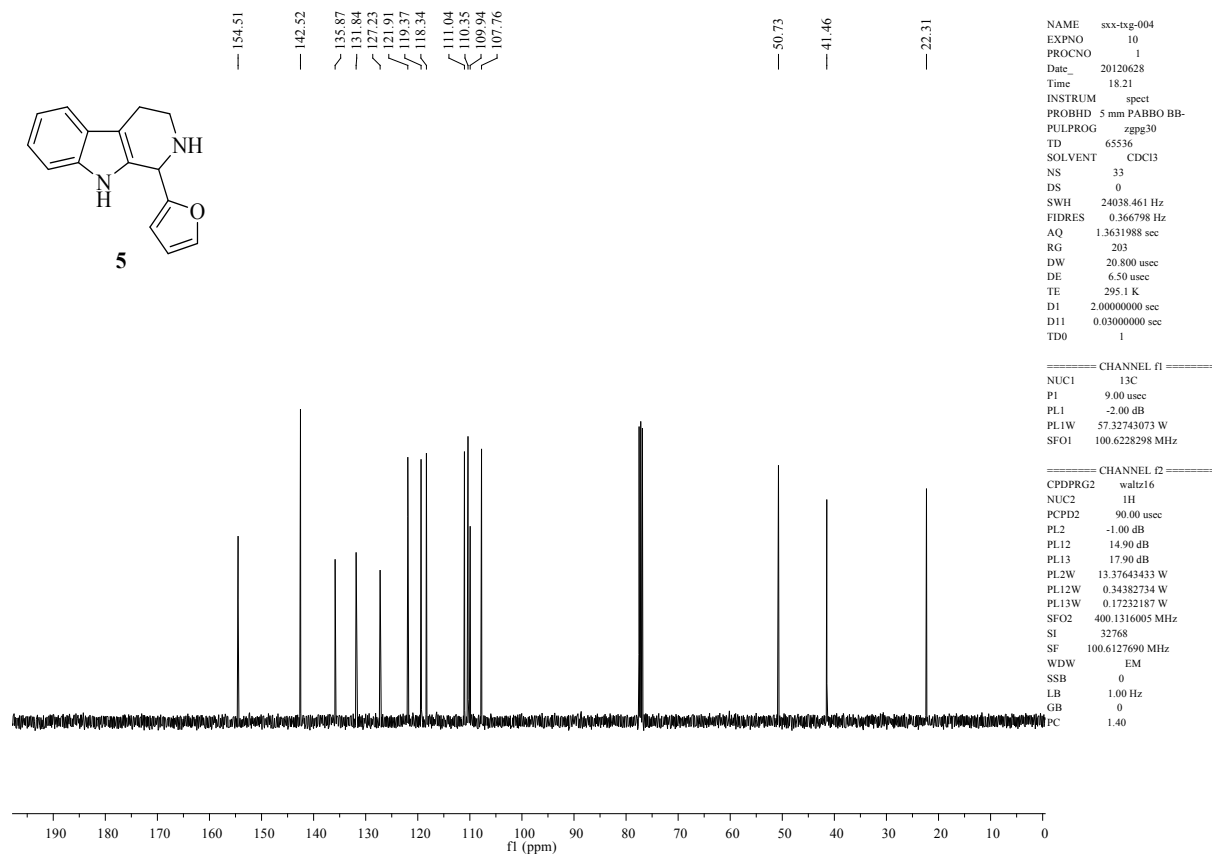

<sup>1</sup>H NMR (CDCl<sub>3</sub>, 400 MHz) spectrum of compound *cis-6*:

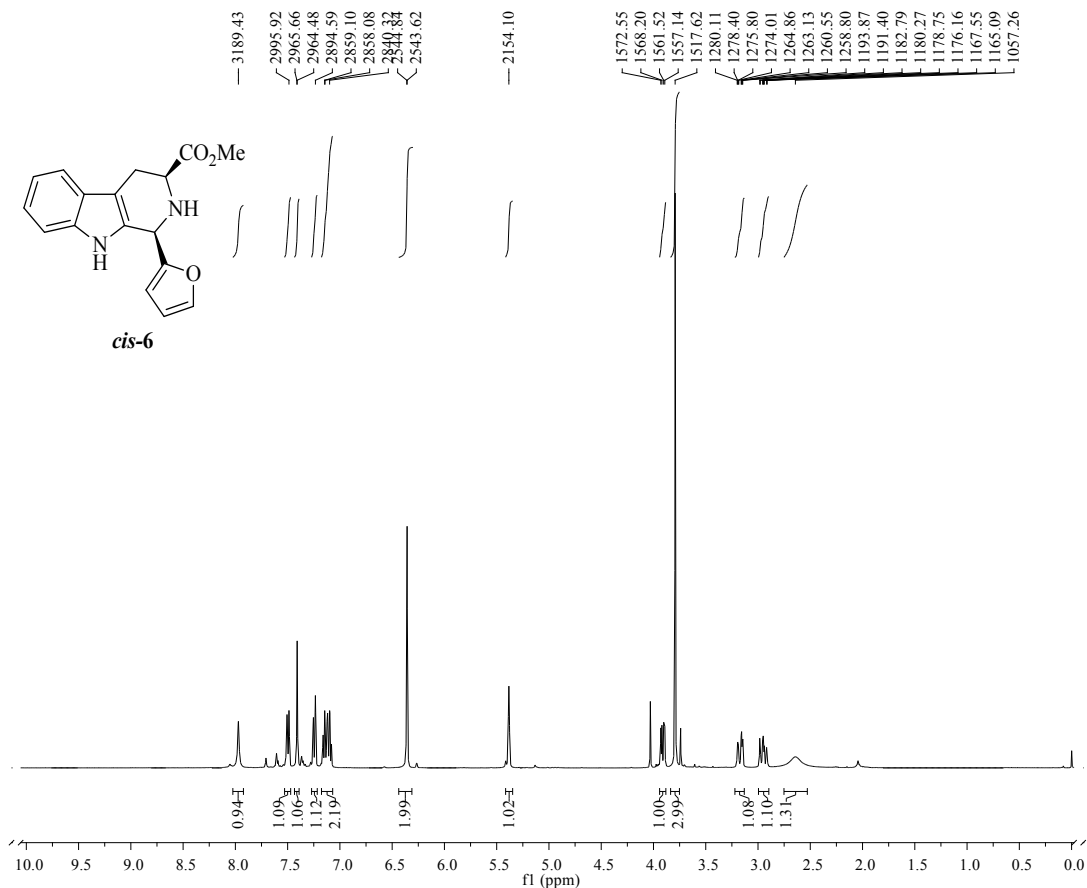

```

NAME      sx-zb-041
EXPNO    10
PROCNO   1
Date_    20151120
Time     7.05
INSTRUM  spect
PROBHD   5 mm PABBO BB-
PULPROG  zg30
TD        65536
SOLVENT  CDCl3
NS        16
DS        0
SWH       8223.685 Hz
FIDRES   0.125483 Hz
AQ        3.9846387 sec
RG        71.8
DW        60.800 usec
DE        6.50 usec
TE        294.7 K
D1        1.00000000 sec
TD0       1
    
```

```

===== CHANNEL f1 =====
NUC1      1H
P1        14.75 usec
PL1       -1.00 dB
PL1W     13.37643433 W
SFO1     400.1324710 MHz
SI        32768
SF        400.1300178 MHz
WDW       EM
SSB       0
LB        0.30 Hz
GB        0
PC        1.00
    
```

<sup>13</sup>C NMR (CDCl<sub>3</sub>, 100 MHz) spectrum of compound *cis-6*:

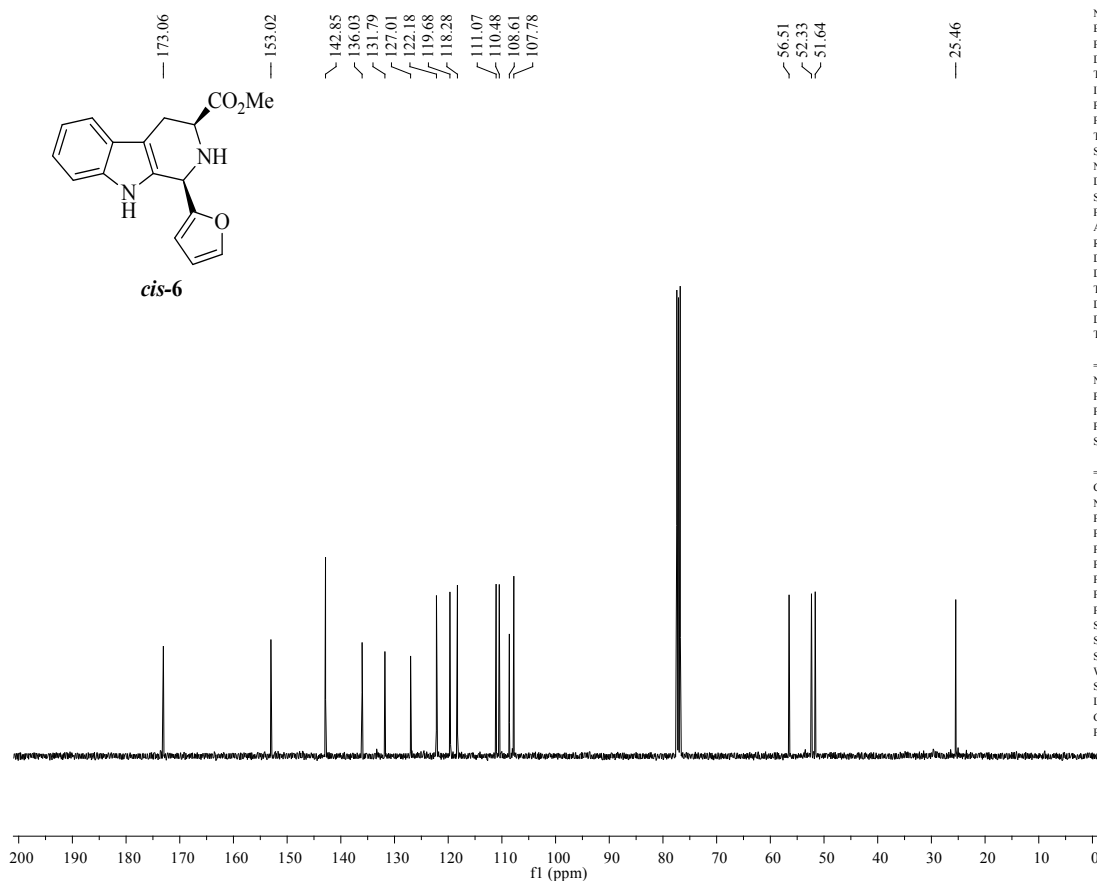

```

NAME      sx-zb-041
EXPNO    11
PROCNO   1
Date_    20151120
Time     7.30
INSTRUM  spect
PROBHD   5 mm PABBO BB-
PULPROG  zgpg30
TD        65536
SOLVENT  CDCl3
NS        400
DS        0
SWH       24038.461 Hz
FIDRES   0.366798 Hz
AQ        1.3631988 sec
RG        203
DW        20.800 usec
DE        6.50 usec
TE        295.5 K
D1        2.00000000 sec
D11      0.03000000 sec
TD0       1
    
```

```

===== CHANNEL f1 =====
NUC1      13C
P1        9.85 usec
PL1       -2.20 dB
PL1W     60.02919006 W
SFO1     100.6228298 MHz

===== CHANNEL f2 =====
CPDPRG2  waltz16
NUC2      1H
PCPD2    90.00 usec
PL2       -1.00 dB
PL12     14.71 dB
PL13     17.90 dB
PL2W     13.37643433 W
PL12W    0.35920334 W
PL13W    0.17232187 W
SFO2     400.1316005 MHz
SI        32768
SF        100.6127690 MHz
WDW       EM
SSB       0
LB        1.00 Hz
GB        0
PC        1.40
    
```

<sup>1</sup>H NMR (CDCl<sub>3</sub>, 400 MHz) spectrum of compound *trans*-6:

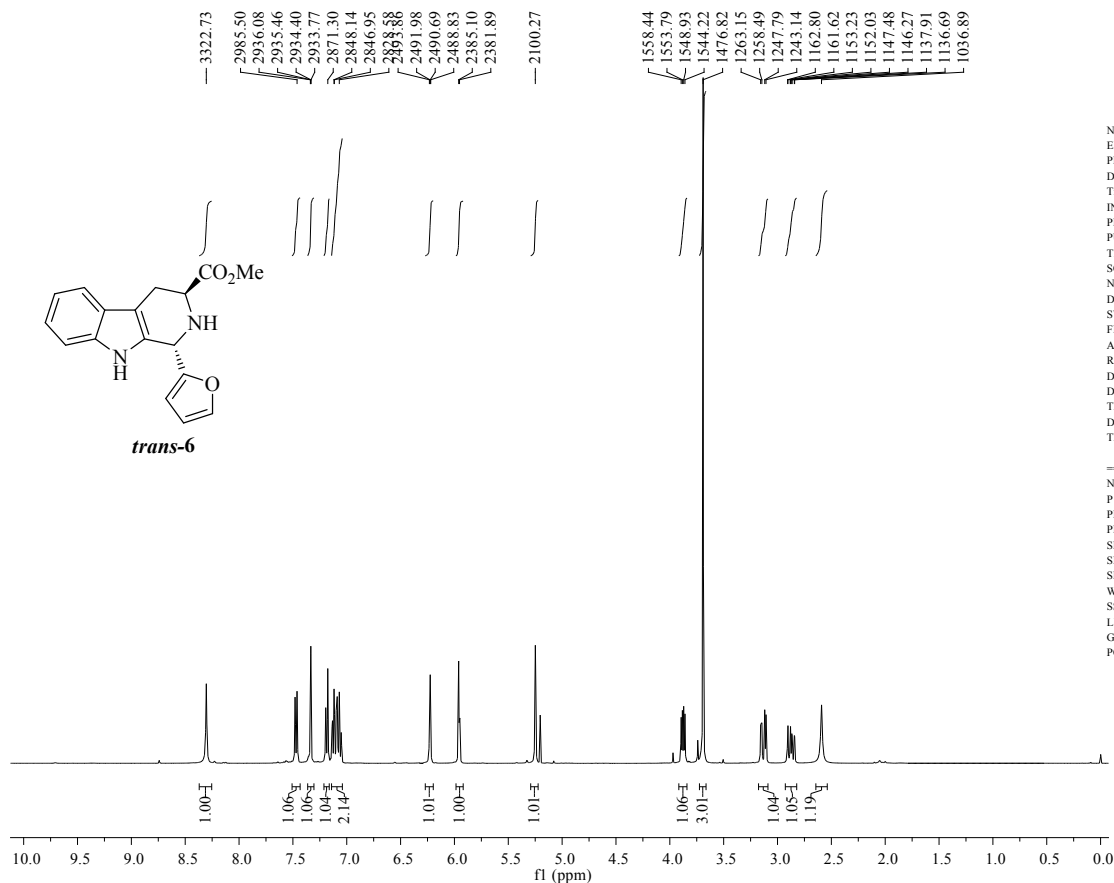

NAME sx-zh-042  
 EXPNO 10  
 PROCNO 1  
 Date\_ 20151120  
 Time 7.37  
 INSTRUM spect  
 PROBHD 5 mm PABBO BB-  
 PULPROG zg30  
 TD 65536  
 SOLVENT CDCl3  
 NS 16  
 DS 0  
 SWH 8223.685 Hz  
 FIDRES 0.125483 Hz  
 AQ 3.9846387 sec  
 RG 32  
 DW 60.800 usec  
 DE 6.50 usec  
 TE 294.8 K  
 D1 1.00000000 sec  
 TDO 1

===== CHANNEL f1 =====  
 NUC1 1H  
 P1 14.75 usec  
 PL1 -1.00 dB  
 PL1W 13.37643433 W  
 SFO1 400.1324710 MHz  
 SI 32768  
 SF 400.1300376 MHz  
 WDW EM  
 SSB 0  
 LB 0.30 Hz  
 GB 0  
 PC 1.00

<sup>13</sup>C NMR (CDCl<sub>3</sub>, 100 MHz) spectrum of compound *trans*-6:

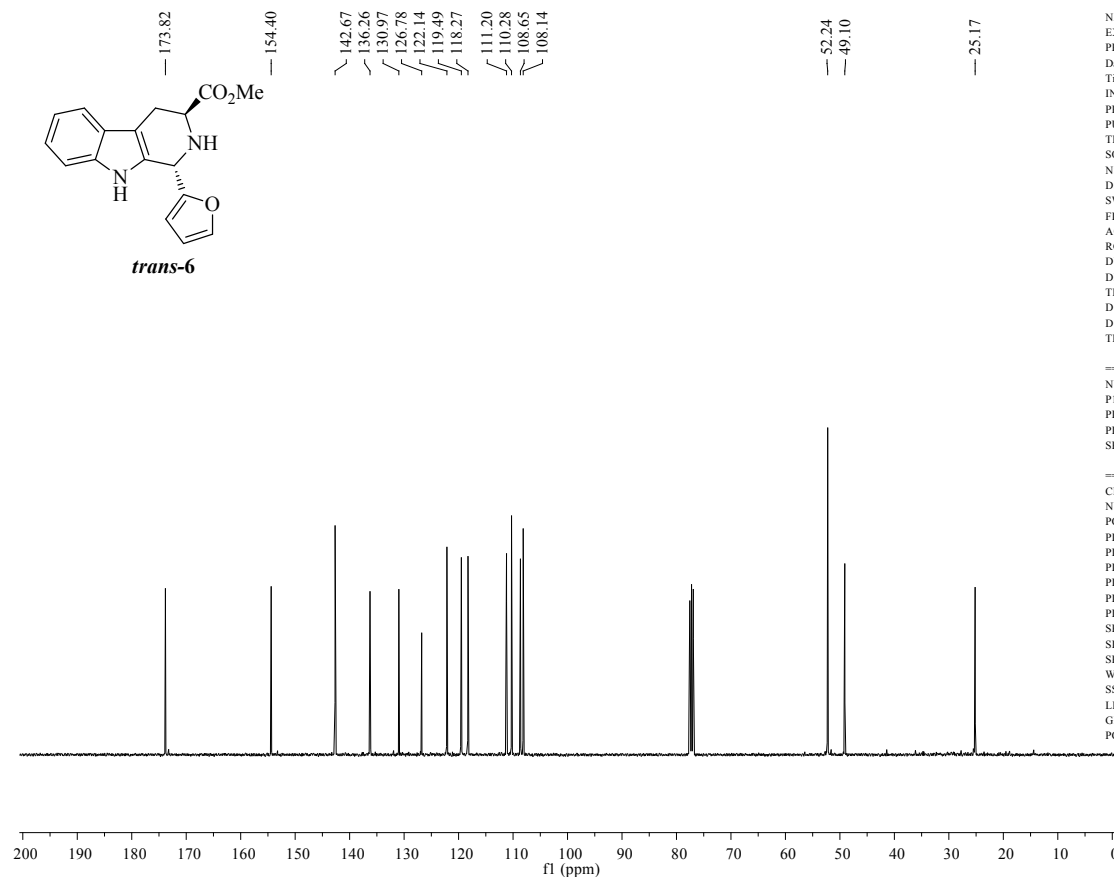

NAME sx-zh-042  
 EXPNO 11  
 PROCNO 1  
 Date\_ 20151120  
 Time 8.01  
 INSTRUM spect  
 PROBHD 5 mm PABBO BB-  
 PULPROG zgpg30  
 TD 65536  
 SOLVENT CDCl3  
 NS 400  
 DS 0  
 SWH 24038.461 Hz  
 FIDRES 0.366798 Hz  
 AQ 1.3631988 sec  
 RG 203  
 DW 20.800 usec  
 DE 6.50 usec  
 TE 295.5 K  
 D1 2.00000000 sec  
 D11 0.03000000 sec  
 TDO 1

===== CHANNEL f1 =====  
 NUC1 13C  
 P1 9.85 usec  
 PL1 -2.20 dB  
 PL1W 60.02919006 W  
 SFO1 100.6228298 MHz  
 ===== CHANNEL f2 =====  
 CPDPRG2 waltz16  
 NUC2 1H  
 PCPD2 90.00 usec  
 PL2 -1.00 dB  
 PL12 14.71 dB  
 PL13 17.90 dB  
 PL2W 13.37643433 W  
 PL12W 0.35920334 W  
 PL13W 0.17232187 W  
 SFO2 400.1316005 MHz  
 SI 32768  
 SF 100.6127690 MHz  
 WDW EM  
 SSB 0  
 LB 1.00 Hz  
 GB 0  
 PC 1.40

<sup>1</sup>H NMR (DMSO-d<sub>6</sub>, 400 MHz) spectrum of compound 7:

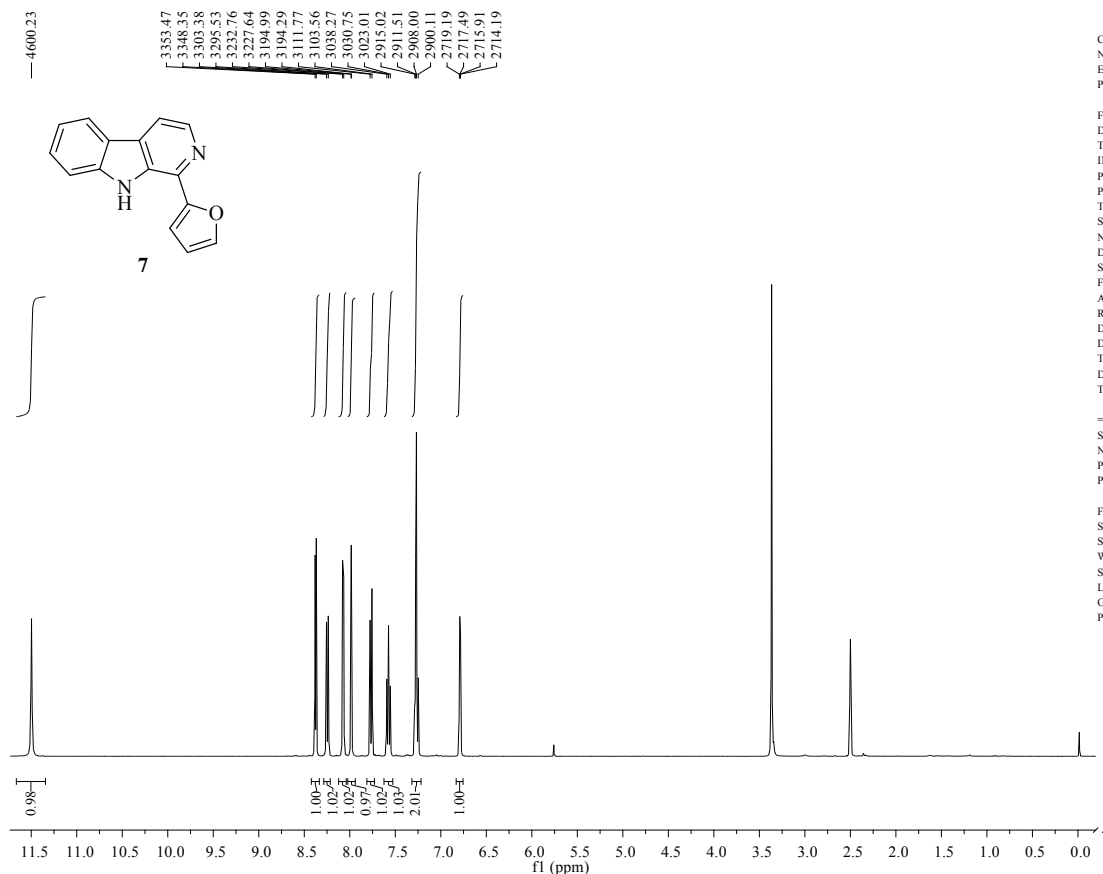

Current Data Parameters  
 NAME 130424-SXX-ZJH-150  
 EXPNO 1  
 PROCNO 1

F2 - Acquisition Parameters  
 Date\_ 20130424  
 Time 14.07  
 INSTRUM spect  
 PROBHD 5 mm PABBO BB/  
 PULPROG zg30  
 TD 65536  
 SOLVENT DMSO  
 NS 8  
 DS 2  
 SWH 8012.820 Hz  
 FIDRES 0.122266 Hz  
 AQ 4.0894465 sec  
 RG 80.6  
 DW 62.400 usec  
 DE 6.50 usec  
 TE 296.0 K  
 D1 1.0000000 sec  
 TD0 1

===== CHANNEL f1 =====  
 SFO1 400.1324710 MHz  
 NUC1 1H  
 P1 13.70 usec  
 PLW1 9.17000008 W

F2 - Processing parameters  
 SI 65536  
 SF 400.1299973 MHz  
 WDW EM  
 SSB 0  
 LB 0.30 Hz  
 GB 0  
 PC 1.00

<sup>13</sup>C NMR (CDCl<sub>3</sub>, 100 MHz) spectrum of compound 7:

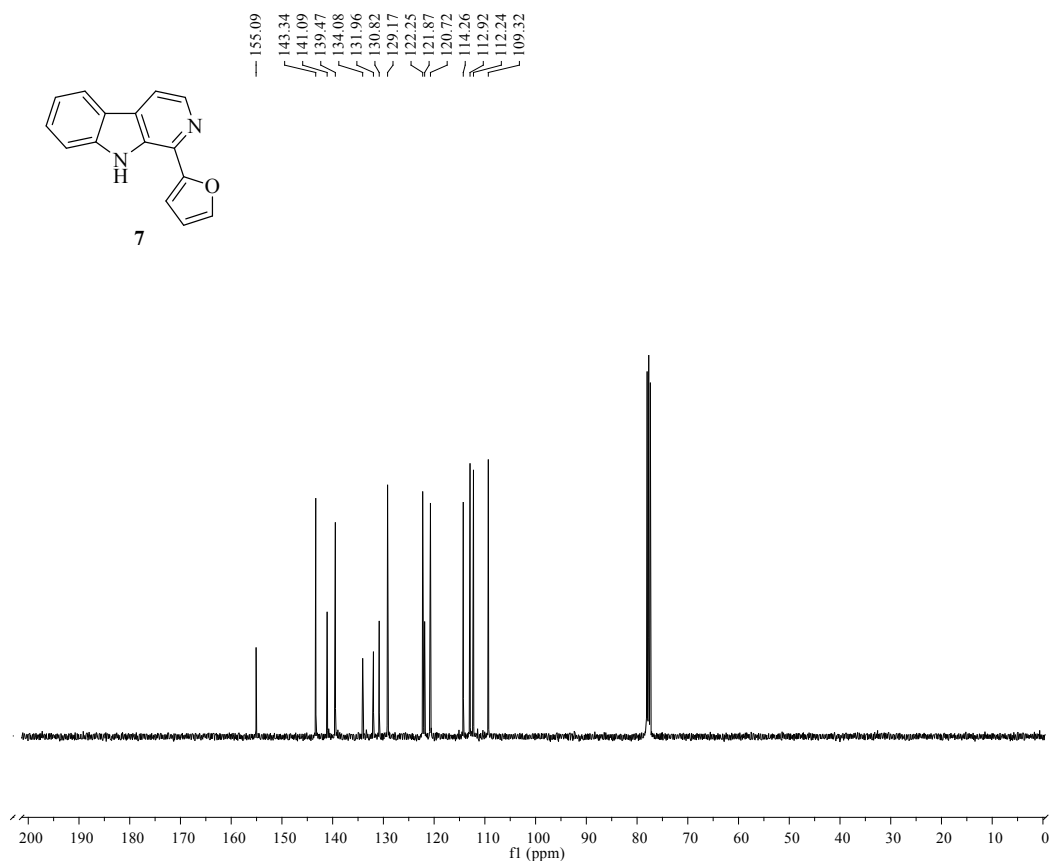

Current Data Parameters  
 NAME 0629-SXX-TXG-005  
 EXPNO 2  
 PROCNO 1

F2 - Acquisition Parameters  
 Date\_ 20120629  
 Time 14.43  
 INSTRUM spect  
 PROBHD 5 mm PABBO BB/  
 PULPROG zgpg30  
 TD 65536  
 SOLVENT CDCl3  
 NS 512  
 DS 4  
 SWH 24038.461 Hz  
 FIDRES 0.366798 Hz  
 AQ 1.3631488 sec  
 RG 203  
 DW 20.800 usec  
 DE 6.50 usec  
 TE 296.5 K  
 D1 2.0000000 sec  
 D11 0.03000000 sec  
 TD0 1

===== CHANNEL f1 =====  
 SFO1 100.6228293 MHz  
 NUC1 13C  
 P1 9.00 usec  
 PLW1 56.42200089 W

===== CHANNEL f2 =====  
 SFO2 400.1316005 MHz  
 NUC2 1H  
 CPDPRG2 waltz16  
 PCPD2 90.00 usec  
 PLW2 9.17000008 W  
 PLW12 0.21247999 W  
 PLW13 0.17211001 W

F2 - Processing parameters  
 SI 32768  
 SF 100.6127690 MHz  
 WDW EM  
 SSB 0  
 LB 1.00 Hz  
 GB 0  
 PC 1.40



<sup>1</sup>H NMR (DMSO-*d*<sub>6</sub>, 400 MHz) spectrum of compound **8**:

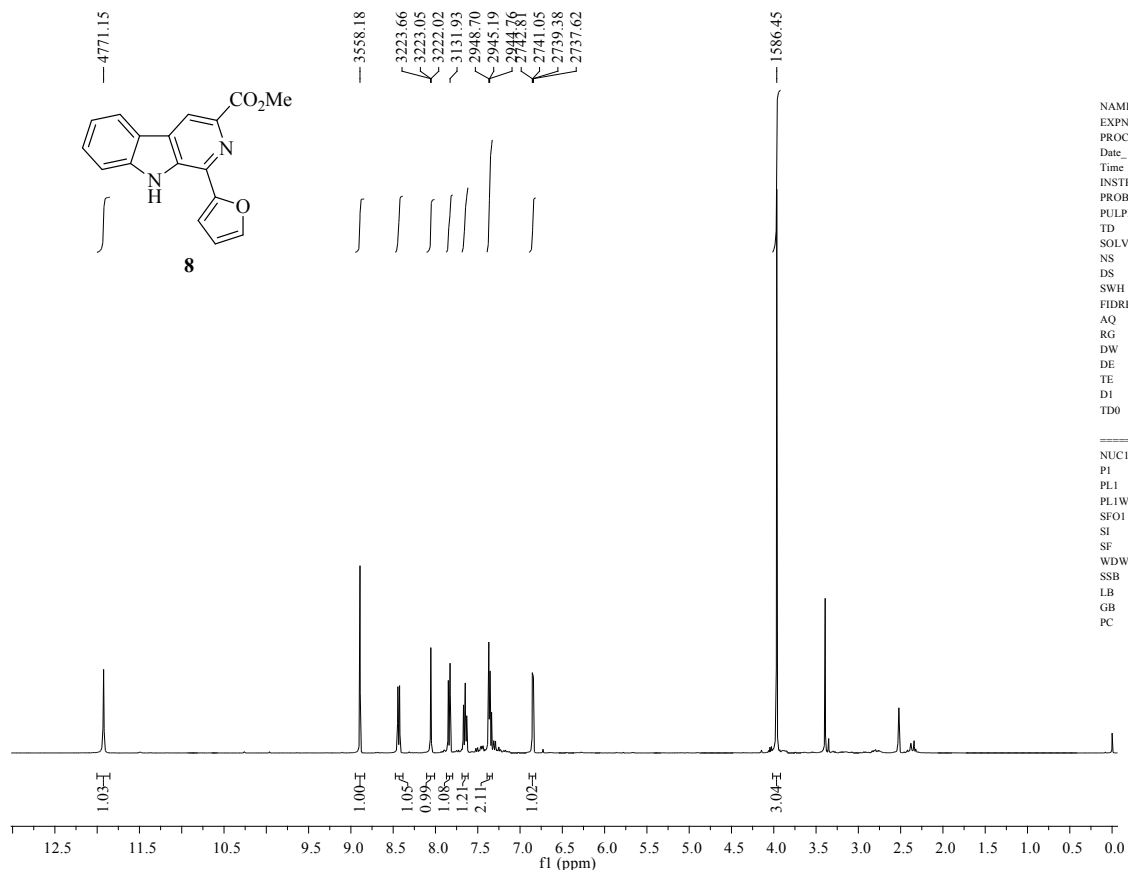

```

NAME      sxx-zb-015
EXPNO     10
PROCNO    1
Date_     20120424
Time      13.06
INSTRUM   spect
PROBHD    5 mm PABBO BB-
PULPROG   zg30
TD         65536
SOLVENT   DMSO
NS         16
DS         0
SWH        8223.685 Hz
FIDRES     0.125483 Hz
AQ         3.9846387 sec
RG         114
DW         60.800 usec
DE         6.50 usec
TE         294.3 K
D1         1.00000000 sec
TD0        1
    
```

```

===== CHANNEL f1 =====
NUC1       1H
P1         14.90 usec
PL1        -1.00 dB
PL1W       13.37643433 W
SFO1       400.1324710 MHz
SI         32768
SF         400.1299947 MHz
WDW        EM
SSB        0
LB         0.30 Hz
GB         0
PC         1.00
    
```

<sup>13</sup>C NMR (DMSO-*d*<sub>6</sub>, 100 MHz) spectrum of compound **8**:

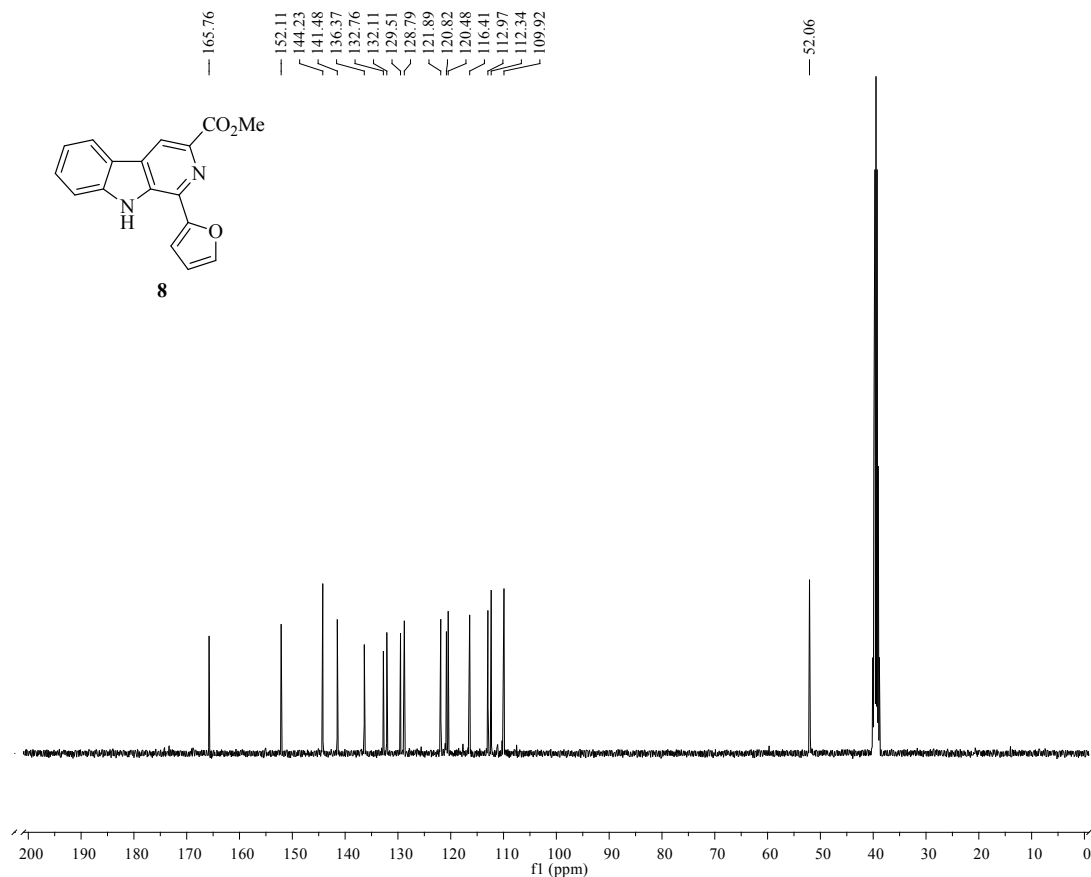

```

NAME      sx-zb-305
EXPNO     10
PROCNO    1
Date_     20130916
Time      22.09
INSTRUM   spect
PROBHD    5 mm PABBO BB-
PULPROG   zgpg30
TD         65536
SOLVENT   DMSO
NS         400
DS         0
SWH        24038.461 Hz
FIDRES     0.366798 Hz
AQ         1.3631988 sec
RG         203
DW         20.800 usec
DE         6.50 usec
TE         295.7 K
D1         2.00000000 sec
D11        0.03000000 sec
TD0        1
    
```

```

===== CHANNEL f1 =====
NUC1       13C
P1         9.85 usec
PL1        -2.20 dB
PL1W       60.02919006 W
SFO1       100.6228298 MHz
    
```

```

===== CHANNEL f2 =====
CPDPRG2   waltz16
NUC2       1H
PCPD2     90.00 usec
PL2        -1.00 dB
PL12      14.71 dB
PL13      17.90 dB
PL2W      13.37643433 W
PL12W     0.35920334 W
PL13W     0.17232187 W
SFO2      400.1316005 MHz
SI         32768
SF         100.6128193 MHz
WDW        EM
SSB        0
LB         1.00 Hz
GB         0
PC         1.40
    
```

<sup>1</sup>H NMR (DMSO-*d*<sub>6</sub>, 400 MHz) spectrum of compound **9**:

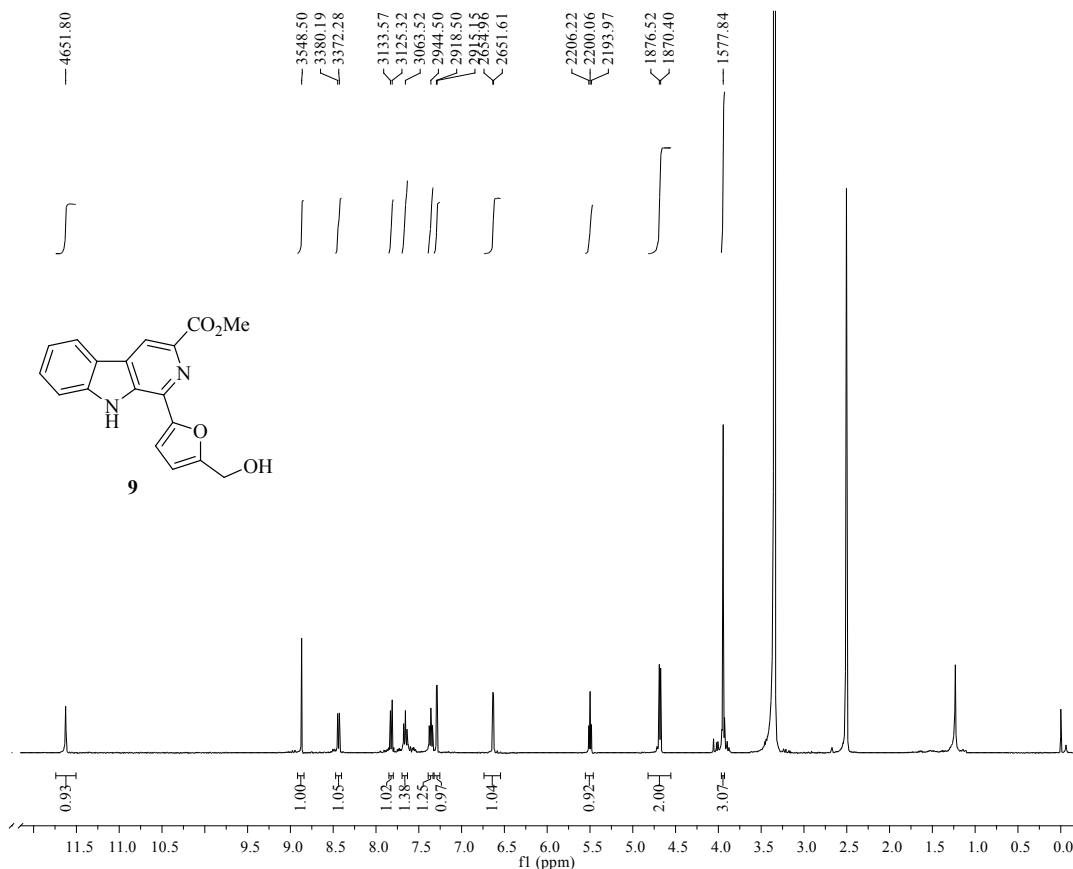

```

NAME      sxx-zh-017
EXPNO    10
PROCNO   1
Date_    20120424
Time     14.47
INSTRUM  spect
PROBHD   5 mm PABBO BB-
PULPROG  zg30
TD       65536
SOLVENT  DMSO
NS       16
DS       0
SWH      8223.685 Hz
FIDRES   0.125483 Hz
AQ       3.9846387 sec
RG       203
DW       60.800 usec
DE       6.50 usec
TE       294.9 K
D1       1.00000000 sec
TD0      1
    
```

```

===== CHANNEL f1 =====
NUC1     1H
P1       14.90 usec
PL1      -1.00 dB
PL1W     13.37643433 W
SFO1     400.1324710 MHz
SI       32768
SF       400.1300017 MHz
WDW      EM
SSB      0
LB       0.30 Hz
GB       0
PC       1.00
    
```

<sup>13</sup>C NMR (DMSO-*d*<sub>6</sub>, 100 MHz) spectrum of compound **9**:

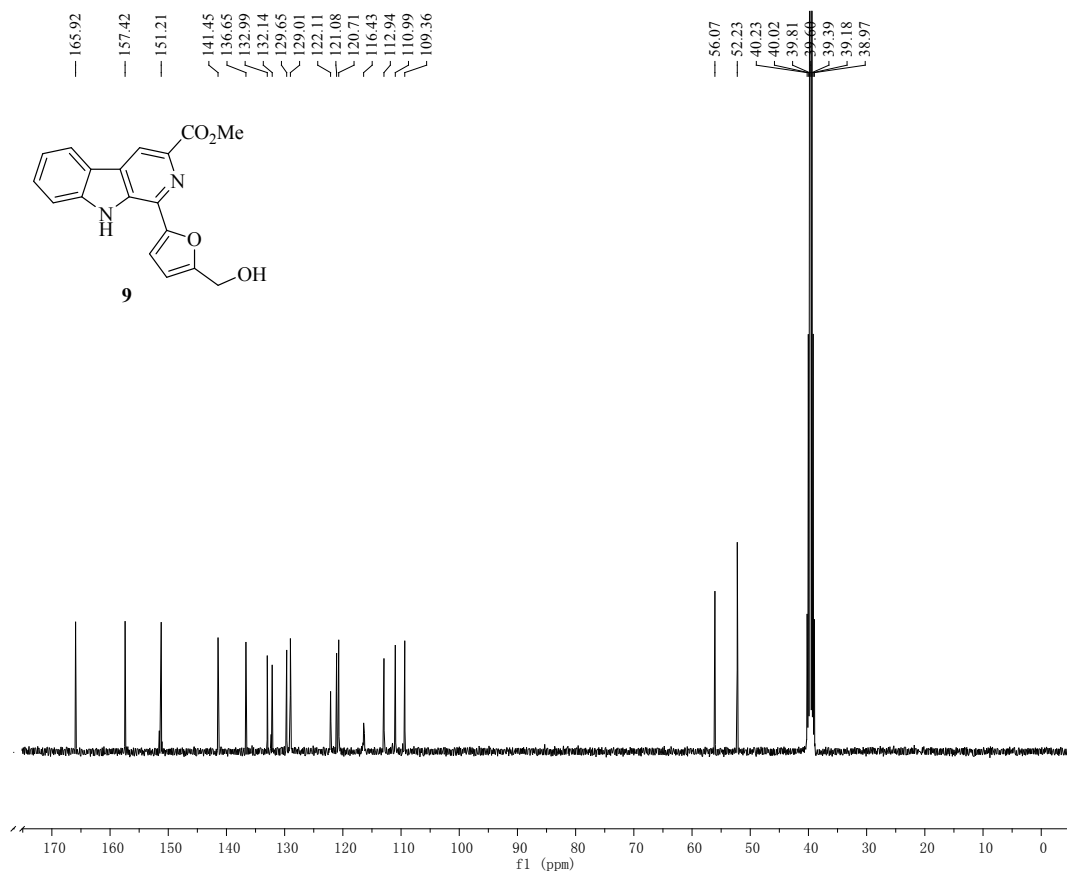

```

NAME      sxx-zh-017C
EXPNO    10
PROCNO   1
Date_    20130919
Time     1.44
INSTRUM  spect
PROBHD   5 mm PABBO BB-
PULPROG  zgpg30
TD       65536
SOLVENT  DMSO
NS       400
DS       0
SWH      24038.461 Hz
FIDRES   0.366798 Hz
AQ       1.3631988 sec
RG       203
DW       20.800 usec
DE       6.50 usec
TE       295.4 K
D1       2.00000000 sec
D11      0.03000000 sec
TD0      1
    
```

```

===== CHANNEL f1 =====
NUC1     13C
P1       9.85 usec
PL1      -2.20 dB
PL1W     60.02919006 W
SFO1     100.6228298 MHz
    
```

```

===== CHANNEL f2 =====
CPDPRG2  waltz16
NUC2     1H
PCPD2    90.00 usec
PL2      -1.00 dB
PL12     14.71 dB
PL13     17.90 dB
PL2W     13.37643433 W
PL12W    0.35920334 W
PL13W    0.17232187 W
SFO2     400.1316005 MHz
SI       32768
SF       100.6127690 MHz
WDW      EM
SSB      0
LB       1.00 Hz
GB       0
PC       1.40
    
```
